# Supplementary material for: Physical activity and self-reported health status among adolescents: a cross-sectional population-based study
Source: PubMed Central journal article supplement — BMJ Open. 2013 May 14;3(5):e002644. doi: 10.1136/bmjopen-2013-002644 (PMC3657658; doi:10.1136/bmjopen-2013-002644), 2013-05-14
Supplement: bmjopen-2013-002644.draft_revisions.pdf [file bmjopen-2013-002644.draft_revisions.pdf]

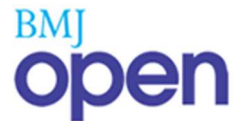

**Physical activity and health status among adolescents: a cross-sectional population-based study**

|                                 |                                                                                                                                                                                                                                                                                                                                                                                                 |
|---------------------------------|-------------------------------------------------------------------------------------------------------------------------------------------------------------------------------------------------------------------------------------------------------------------------------------------------------------------------------------------------------------------------------------------------|
| Journal:                        | <i>BMJ Open</i>                                                                                                                                                                                                                                                                                                                                                                                 |
| Manuscript ID:                  | bmjopen-2013-002644                                                                                                                                                                                                                                                                                                                                                                             |
| Article Type:                   | Research                                                                                                                                                                                                                                                                                                                                                                                        |
| Date Submitted by the Author:   | 29-Jan-2013                                                                                                                                                                                                                                                                                                                                                                                     |
| Complete List of Authors:       | Galán, Iñaki; National Centre of Epidemiology, Boix, Raquel; National Centre of Epidemiology, Medrano, María José; National Centre of Epidemiology, Ramos, Pilar; Faculty of Psychology, University of Seville, Spain, Rivera, Francisco; University of Huelva, Pastor-Barriuso, Roberto; National Centre of Epidemiology, Moreno, Carmen; Faculty of Psychology, University of Seville, Spain, |
| <b>Primary Subject Heading</b>: | Public health                                                                                                                                                                                                                                                                                                                                                                                   |
| Secondary Subject Heading:      | Sports and exercise medicine                                                                                                                                                                                                                                                                                                                                                                    |
| Keywords:                       | Physical activity, Health status, Adolescents                                                                                                                                                                                                                                                                                                                                                   |
|                                 |                                                                                                                                                                                                                                                                                                                                                                                                 |

SCHOLARONE™  
Manuscripts

1  
2  
3 **Physical activity and health status among adolescents: a cross-sectional population-based**  
4  
5 **study**  
6

7 **Galán I,<sup>1,2</sup> Boix R,<sup>1</sup> Medrano MJ,<sup>1</sup> Ramos P,<sup>3</sup> Rivera F,<sup>4</sup> Pastor-Barriuso R,<sup>1,5</sup> Moreno C<sup>3</sup>**  
8  
9

10  
11  
12 <sup>1</sup> *Centro Nacional de Epidemiología. Instituto de Salud Carlos III* [National Centre of  
13 Epidemiology, Carlos III Institute of Health], Madrid (Spain)  
14

15  
16 <sup>2</sup> *Departamento de Medicina Preventiva y Salud Pública. Facultad de Medicina. Universidad*  
17 *Autónoma de Madrid* [Department of Preventive Medicine and Public Health, Faculty of  
18 Medicine, Autonomous University of Madrid], Madrid (Spain)  
19

20  
21 <sup>3</sup> *Departamento de Psicología Evolutiva y de la Educación. Facultad de Psicología.*  
22 *Universidad de Sevilla* [Department of Developmental and Educational Psychology, Faculty of  
23 Psychology, University of Seville], Seville (Spain)  
24

25  
26 <sup>4</sup> *Departamento de Psicología Clínica, Experimental y Social. Universidad de Huelva*  
27 [Department of Clinical, Experimental and Social Psychology, University of Huelva], Huelva  
28 (Spain)  
29

30  
31 <sup>5</sup> Consortium for Biomedical Research in Epidemiology and Public Health (CIBERESP), Spain  
32  
33

34  
35  
36  
37  
38  
39  
40 **Keywords:** Physical activity, health status, adolescents  
41

42 **Word count:** 3,032  
43  
44

45  
46  
47 **Corresponding author:**

48 Iñaki Galán

49 Centro Nacional de Epidemiología, Madrid (Spain)

50 c/ Monforte de Lemos 5. CP: 28029

51 Telephone: +34 918222679

52 Fax: +34 913877815

53 e-mail: [igalan@isciii.es](mailto:igalan@isciii.es)  
54  
55  
56  
57  
58  
59  
60

## Abstract

**Objectives:** Little is known about the dose-response relationship between physical activity and health benefits among young people. Our objective was to analyse the association between the frequency of undertaking Moderate-to-Vigorous Physical Activity (MVPA) and the health status of the adolescent population.

**Design:** Cross-sectional study.

**Setting:** All regions of Spain.

**Participants:** Students aged 11-18 years participating in the Spanish Health Behaviour in School-aged Children (HBSC) survey 2006. A total of 375 schools and 21,188 students were selected.

**Main outcomes:** The frequency of undertaking MVPA was measured, as were the following four health indicators: self-rated health, health complaints, satisfaction with life, and health-related quality of life. Linear and logistic regression models were used to analyse the association, adjusting for potential confounding variables and the modelling of the dose-response relationship.

**Results:** As the frequency of MVPA increased, the improvement in health benefits was greater. A linear trend ( $p < 0.05$ ) was found for self-rated health and health complaints in males and females, and for satisfaction with life among females; for health-related quality of life, this relationship was quadratic for both sexes ( $p < 0.05$ ). For self-reported health and health complaints, the effect was found to be of greater magnitude in males than in females and, in all scales, the benefits were observed from the lowest frequencies of MVPA, especially in males.

**Conclusions:** A protective effect of MVPA was found in both sexes for the four health indicators studied, and this activity had a gradient effect. Among males, health benefits were detected from

1  
2  
3  
4  
5  
6  
7  
8  
9  
10  
11  
12  
13  
14  
15  
16  
17  
18  
19  
20  
21  
22  
23  
24  
25  
26  
27  
28  
29  
30  
31  
32  
33  
34  
35  
36  
37  
38  
39  
40  
41  
42  
43  
44  
45  
46  
47  
48  
49  
50  
51  
52  
53  
54  
55  
56  
57  
58  
59  
60

very low levels of physical activity and the magnitude of the relationship was greater than that for females.

For peer review only

## Article summary

### Article focus

- Although it is recommended that all adolescents should undertake Moderate-to-Vigorous Physical Activity (MVPA) on most days of the week, little is known about the nature of the relationship in this population, and whether or not the effect varies depending on age and sex.
- We examined cross-sectional associations between the frequency of undertaking MVPA and the health status of the adolescent population, using subjective health scales that are considered to be useful tools especially in the stage of adolescence, when psychological aspects are so important in the feeling of well-being among young people.

### Key messages

- The protective effect of MVPA on health was detected from very low levels, below those established by current recommendations.
- A linear trend was found for self-rated health, health complaints and for satisfaction with life. For health-related quality of life the relationship was quadratic.
- The positive effect on health produced lower results in females than in males.

### Strengths and limitations of this study

- The main strength is the representativeness and large size of the sample. The methodology employed is the standard one for the HBSC study in which more than 40 Western countries have participated.
- A major limitation is the cross-sectional nature of the study. Moreover, the measurement of health status using subjective health scales and the estimation of MVPA are both based on self-reported information.

## INTRODUCTION

According to the World Health Organization<sup>1</sup>, physical inactivity is the fourth most important risk factor affecting global mortality, to which nearly 6% of all deaths are attributed. In the adolescent population, short-term benefits related to Physical Activity (PA) are improvements in lipid profile, blood pressure, metabolic syndrome, muscular strength and bone density, together with a reduction in obesity and overweight levels, as well as a decrease in emotional problems and depressive symptoms.<sup>2-5</sup> Moreover, young people who undertake PA adopt healthy behaviour more easily and have better levels of academic achievement and cognitive functioning.<sup>4,6-8</sup>

The dose-response relationship between physical activity and various health indicators has mainly been studied in the adult population,<sup>9-15</sup> where there is still a controversy about whether or not this relationship is linear.<sup>12,16</sup> Although it is recommended that all adolescents should undertake Moderate-to-Vigorous Physical Activity (MVPA) on most days of the week, little is known about the nature of the relationship in this population. Therefore, finding out the effect on health of several levels of PA could have important implications for improving the recommendations regarding this activity.

It should be emphasized that the special characteristics of adolescence require that measurement of health status must be approached from a global and comprehensive perspective for each individual. Concepts such as 'subjective health' and 'health-related quality of life' cover complex physical, emotional, mental and social aspects.<sup>17,18</sup> Hence, it is important to evaluate if the effect of the PA is distributed in a distinct way for the different dimensions of health status.

Finally, although PA varies considerably depending on age and sex,<sup>19</sup> to our knowledge there have been very few studies in the literature about the role that these variables play regarding the effect of PA on health.<sup>4</sup>

1  
2  
3 The objective of this study was to analyse the association between the frequency of undertaking  
4 MVPA and the different dimensions of adolescent health status, assessing if this relationship  
5 differs according to age and sex.  
6  
7  
8  
9

## 10 11 12 **METHODS**

### 13 14 **Study population**

15  
16  
17 The source of information was the Health Behaviour in School-aged Children (HBSC) study  
18 carried out in 2006.<sup>20</sup> The population was a representative sample of preadolescents and  
19 adolescents, with an age range of 11-18 years, resident in Spain and enrolled in school from the  
20 5th year of primary school to the last year of upper secondary school (2nd year of  
21 baccalaureate). A multistage stratified random sampling was used, taking into account age  
22 strata, region (autonomous community), school site (rural and urban), and type of school (public  
23 and private). Initially, 480 schools were contacted of which 377 (103 private and 274 public  
24 schools) agreed to participate in the study, which represented a response rate of 78.5%. A total  
25 of 22,350 questionnaires were collected, although subsequently 539 were excluded because of  
26 non-response to questions about sex and age, or lack of response to more than 50% of the  
27 questionnaire. The sample size was 21,811 participants. The study was carried out in spring  
28 2006. Previously trained survey technicians visited the selected schools, where the students  
29 completed an anonymous questionnaire during normal school hours.  
30  
31  
32  
33  
34  
35  
36  
37  
38  
39  
40  
41  
42  
43  
44  
45  
46

### 47 **Study variables**

48  
49  
50 Health status was measured using four indicators: 1) self-rated health was measured using the  
51 question “*Would you say that your health is: excellent, good, fair or bad?*”. Optimal health status  
52 was categorized by a response of excellent or good, and sub-optimal health status was  
53 categorized by a response of fair or bad. 2) The health complaints indicator was assessed using a  
54  
55  
56  
57  
58  
59  
60

1  
2  
3 scale based on the HBSC-Symptom Checklist, which is a list of eight physical and psychological  
4 symptoms (headaches, abdominal pain, backache, feeling low, irritability, nervousness, sleeping  
5 difficulties and dizziness), to estimate their frequency during the last six months. Having 2 or  
6 more symptoms with a frequency of several times a week or daily was considered to define  
7 having noticeable subjective health complaints.<sup>17</sup> 3) Satisfaction with life was estimated using  
8 the Cantril Ladder,<sup>21</sup> in which, using a scale from 0 to 10, the participant was asked “*on which*  
9 *rung of the ladder (scale from 0 to 10) do you feel you stand at this moment in your life?*”, with 0  
10 being the worst score and 10 the best. A score of 0 to 5 was categorized as dissatisfied, whereas a  
11 score of 6 to 10 was categorized as satisfied.<sup>17</sup> 4) Health-related quality of life was measured  
12 using the Kidscreen-10 index,<sup>22</sup> a series of 10 questions about mood, ability to concentrate,  
13 energy, vitality, well-being, ability to have fun with friends. Each question has five categories of  
14 response ranging from “never” to “always” or from “not at all” to “extremely often”. When using  
15 this index the scores are calculated using T-values from a representative sample of the European  
16 general population with a mean of 50 and a standard deviation of 1.  
17  
18  
19  
20  
21  
22  
23  
24  
25  
26  
27  
28  
29  
30  
31  
32

33  
34 The frequency of MVPA was measured using the question: “*in the last seven days, considering*  
35 *moderate and vigorous activity... On how many days did you feel you were physically active for*  
36 *a total of 60 minutes per day?*” The response categories were from 0 to 7 days.  
37  
38  
39  
40

41 The following factors were considered as potentially confounding variables for the association  
42 between health status and frequency of MVPA: 1) personal variables (sex, age, country of birth,  
43 current smoker, alcohol consumption, body-mass index –calculated as the ratio of weight in  
44 kg/height in m<sup>2</sup> from self-reported weight and height, and defining overweight and obesity using  
45 the cut-off points proposed by Cole et al.,<sup>23</sup> consumption of fruit and vegetables, daily  
46 breakfast, number of hours each day spent watching television and using computers or game  
47 consoles, number of hours each day spent doing school homework); 2) family variables  
48 (employment status of the father, employment status of the mother, family purchasing power –  
49  
50  
51  
52  
53  
54  
55  
56  
57  
58  
59  
60



1  
2  
3 measured by the Family Affluence Scale,<sup>24</sup> an index estimated by four items: number of times  
4 that the adolescents have been on holiday with their family in the last 12 months; does the family  
5 own a car or van; does the student have his/her own bedroom; number of computers owned by  
6 the family-, country of birth of the father, country of birth of the mother, type of household –both  
7 parents, single parent, blended family–, number of minors in the household, number of adults in  
8 the household); and 3) relationships with the school, the family and friends (academic  
9 achievement, satisfaction with family relationships, satisfaction with relationships with friends).  
10  
11  
12  
13  
14  
15  
16  
17  
18 The variables are categorized in Table 1.  
19

### 20 21 **Data analysis**

22  
23  
24 The questionnaires with missing values were excluded from data analysis, so that the number of  
25 subjects studied was 17,467 for self-rated health; 17,358 for satisfaction with life; 16,803 for  
26 health complaints; and 16,560 for health-related quality of life.  
27  
28  
29

30  
31 The complex sampling design was taken into account during analysis by using the “Survey Data”  
32 module of the statistical package Stata v11. Prevalence was calculated for optimal self-rated  
33 health, low level of health complaints, high satisfaction with life, and the means for the scores on  
34 the scale for health-related quality of life, with 95% confidence intervals, both global and for the  
35 categories of each one of the exposure variables. Regression models were used, logistic ones for  
36 the estimation of the odds ratio of prevalence (OR) and linear ones for the calculation of the  
37 regression coefficients, adjusting for the potential confounding variables mentioned above. In  
38 these models, statistical significance was set at  $p < 0.05$ .  
39  
40  
41  
42  
43  
44  
45  
46  
47

48  
49 Linear and quadratic trends of the association between undertaking MVPA and the health  
50 indicators were calculated from the regression models. For the linear trend, the average value for  
51 each category was used modelling it as a continuous variable, while for the quadratic trend the  
52 square of these values was used.  
53  
54  
55  
56  
57  
58  
59  
60

1  
2  
3 To further explore the relationships between PA and health status indicators without imposing  
4 any particular functional form for the dose-response trends, the amount of moderate-to-vigorous  
5 physical activity was entered in regression models using restricted quadratic splines with knots at  
6 1, 3.5, and 6 days/week.<sup>25</sup> Restricted quadratic splines allow for different quadratic trends within  
7 each intermediate category and linear trends in boundary categories, and hence they can  
8 accommodate a wide variety of smooth dose-response curves, while avoiding implausible shapes  
9 at the tails of the exposure distribution.  
10  
11  
12  
13  
14  
15  
16  
17

18 Interactions between MVPA, age and sex were evaluated. Given that interactions were found in  
19 the relationship between the frequency of MVPA and health status according to sex, the results  
20 are shown separately for males and females.  
21  
22  
23  
24  
25  
26  
27

## 28 RESULTS

29  
30  
31 Table 1 describes the health status of the questionnaire respondents, as estimated by the four  
32 health indicators. A total of 91.1% (CI 95%: 90.3-92.0) declared they had an optimal self-rated  
33 health, 67.4% (CI 95%: 66.1-68.5) had a low level of health complaints and 90.9% (CI 95%:  
34 90.1-91.6) reported a high satisfaction with life. The mean score on the scale for health-related  
35 quality of life was 47.1 (CI 95%: 46.5- 47.6).  
36  
37  
38  
39  
40  
41  
42

43 According to all the indicators used, the level of health was better, in a statistically significant  
44 way, for the questionnaire respondents who indicated that they undertook MVPA more  
45 frequently, with gradual increases depending on the categories of PA (Table 1).  
46  
47  
48  
49

50 No statistically significant interactions were found between MVPA and age, whereas statistical  
51 significance was reached between MVPA and sex for the indicators self-rated health and  
52 satisfaction with life.  
53  
54  
55  
56  
57  
58  
59  
60

1  
2  
3 Tables 3 and 4 and Figure 1 show the results of the multivariate analysis that evaluated, for each  
4 sex separately, the association of the frequency of undertaking MVPA with the different indicators  
5 of health status, controlling the effect on this association of personal and family factors. For both  
6 boys and girls, there was a positive, graded and statistically significant association (linear trend,  
7  $p < 0.001$ ) between MVPA and self-rated health (Table 3), with odds ratios (OR) that ranged in  
8 males from 2.37, for those who undertook MVPA on 1-2 days, to 4.60 and 4.05, for those  
9 undertaking it on 5-6 and 7 days, respectively. Moving from less than 5 days to 5-6 days of MVPA,  
10 the OR increased from 2.34 to 4.60. In females, although a positive association was also found, the  
11 magnitude of the benefits on self-reported health was lower, with values that were half those for the  
12 males (OR= 2.14, if MPVA undertaken 7 days).

13  
14  
15  
16  
17  
18  
19  
20  
21  
22  
23  
24  
25  
26 Regarding less health complaints (Table 3), an increase in the positive effects was seen in males  
27 from small amounts of MVPA on 1-2 days (OR=1.66,  $p=0.008$ ), which increased further to an OR  
28 of nearly 2 for MVPA on 5-6 days. In females, this effect was lower, reaching statistical  
29 significance after MVPA on 5-6 days with an OR of 1.46 ( $p=0.009$ ). The linear trend  $p$ -value was  
30 statistically significant ( $p < 0.001$ ) in both males and females.

31  
32  
33  
34  
35  
36  
37  
38  
39  
40  
41  
42  
43  
44  
45  
46  
47  
48  
49  
50  
51  
52  
53  
54  
55  
56  
57  
58  
59  
60  
The degree of satisfaction with life (Table 3) was also shown to be significantly associated with the  
frequency of undertaking PA; among the boys the OR for high satisfaction increased to 1.99 if  
physical activity was undertaken on 1-2 days per week, and satisfaction remained at these values  
for frequencies of more than 5 days of MVPA. In girls, the magnitude of the effect was similar, but  
the gradient was steeper. The linear trend  $p$ -value was statistically significant for females  
( $p < 0.001$ ), but not for males.

Table 4 shows the same analysis applied to health-related quality of life, considering it as a  
continuous variable and using linear regression to analyse it. In males, an increasing dose-  
response effect was seen, especially noticeable after 5-days per week of MVPA ( $\beta=3.03$ ), which  
increased even further, to 5.08, for those undertaking MVPA for 7-days per week. In females,

1  
2  
3 the protective effect was lower at low levels of frequency of MVPA, but reached the same  
4  
5 magnitude from 5 days of MVPA. Overall, this indicator was the one that showed fewer  
6  
7 differences between boys and girls, as can be seen in Figure 1. The quadratic trend p-value was  
8  
9 statistically significant in males ( $p=0.006$ ) and females ( $p<0.001$ ).  
10  
11

## 12 13 14 15 **DISCUSSION**

### 16 17 18 **Principal findings**

19  
20 The results of this study clearly show the benefits of undertaking physical activity on the health  
21  
22 status of adolescents enrolled in schools in Spain. The following results should be highlighted:  
23

24 1) the magnitude of the effect, with benefits on optimal health that reached OR higher than 4,  
25  
26 for males who undertook MVPA daily or on most days, as compared to those who never  
27  
28 undertook it; 2) the existence of a dose-response effect, with the positive effects increasing in  
29  
30 accordance with the increase in the frequency of MVPA; 3) the consistency of the results with  
31  
32 the association present for the four health indicators in both sexes; and 4) the greater positive  
33  
34 effect in males, especially at low levels of frequency of MVPA.  
35  
36

37  
38 Few studies have linked the effect of MPVA on general indicators of health status in  
39  
40 adolescents. Using data from the HBSC study for adolescents from North America, Western  
41  
42 Europe, Eastern Europe, Northern Europe and Southern Europe, Iannotti et al.<sup>26</sup> evaluated the  
43  
44 relationship between the frequency of PA and self-rated health, health complaints and  
45  
46 satisfaction with life and found, as in our study, beneficial effects for all three indicators.  
47  
48

### 49 50 **Dose-response relationship**

51  
52 The dose-response relationship between PA and health implies that increases in PA cause  
53  
54 additional improvements in health status, even when it is not undertaken very frequently. This  
55  
56 has also been found in other studies regarding dyslipidemia, blood pressure, overweight and  
57  
58  
59  
60

1  
2  
3 obesity, metabolic syndrome and mental health.<sup>4,27-29</sup> However, to our knowledge, there are no  
4  
5 comparable studies that measure the nature of the relationship on general indicators of health  
6  
7 status. Indeed, there is a controversy about whether this relationship is linear or curvilinear, as  
8  
9 some studies have found linear patterns, whereas others have not,<sup>4,27-29</sup> probably because the  
10  
11 patterns can be different depending upon the health effect that is being assessed. In our study, a  
12  
13 curvilinear relationship was found with a slight slowdown in the health benefits beyond 3-4  
14  
15 days of MVPA in the following indicators: self-rated health; health complaints; and satisfaction  
16  
17 with life. In contrast, for health-related quality of life in both sexes, the benefits increased from  
18  
19 these intermediate levels of MVPA. These differences in the dose-response relationship suggest  
20  
21 that the effect varies depending upon the different dimensions of health status to which the  
22  
23 indicators are related. Although self-rated health has been proposed as a measurement of the  
24  
25 summary effect of multiple dimensions of health, it is more closely related to the physical  
26  
27 dimension rather than the mental and social ones.<sup>30</sup> Similarly, the scale for health complaints is  
28  
29 related to symptoms with psychosomatic components very frequently associated with  
30  
31 adolescence.<sup>31</sup> Yet, the scale for the quality of life, besides including such physical and mental  
32  
33 dimensions, also incorporates family and social relationships, which could suggest that these  
34  
35 additional dimensions may be involved in the achieving of greater health benefits with the  
36  
37 maximum frequencies of MVPA.  
38  
39  
40  
41  
42

43  
44 It should be stressed that the benefits to health status are obtained from low levels of PA,  
45  
46 especially for boys. Similar results have been reported for self-rated health in a young adult  
47  
48 population<sup>32</sup> and regarding blood pressure and dyslipidemia in adolescents.<sup>28,29</sup> This could have  
49  
50 important implications for the preventive recommendations because, although 60 minutes of  
51  
52 physical activity is currently recommended (if possible on a daily basis), the fact that positive  
53  
54 results of a moderate magnitude can be achieved with very small amounts of MVPA could  
55  
56 encourage the participation of the more sedentary people.  
57  
58  
59  
60

### Gender differences

The results in health that are derived from undertaking MVPA are greater in males, especially in self-rated health and, to a lesser extent, in having less health complaints. According to our study, females need to undertake more days of MVPA to obtain similar health benefits. However, the effect on satisfaction with life and health-related quality of life was fairly similar in males and females. These differences suggest that the variation of the effect of MVPA according to sex could also be associated to different dimensions of health status. Previous reviews have clearly shown important differences between males and females in the quantity, intensity and type of physical activity, and that, in part, these distinctions could be explained by biological differences and those relating to sociocultural environment and body image<sup>19,33</sup>. It would, therefore, be interesting for subsequent studies to undertake detailed research about this relationship.

### Strengths and weaknesses

To aid correct interpretation of these data, several limitations should be mentioned. First, the limitation in causal inference, stemming from the cross-sectional nature of the study, would theoretically affect the temporality of the association. That is, people who have health problems can have limitations in undertaking physical exercise. However, from the data of the National Health Survey of 2006,<sup>34</sup> only 1.7% of adolescents between 16 and 19 years do not undertake the leisure time physical exercise that they would like to take because of health problems, hence, this figure would not affect the results obtained. Second, although it has shown an acceptable validation in our geographical coverage,<sup>35</sup> the measurement of MVPA is based (like several covariables of the study) on self-reported information and, therefore, it is not exempt from measurement bias. Third, it has not been possible to differentiate the effect of the intensity of physical activity, which is a dimension independently related with self-rated health.<sup>32</sup>

1  
2  
3 The main strengths of this study are the representativeness and large size of the sample used,  
4  
5 which means that the results can be extrapolated accurately, and that the methodology employed  
6  
7 is the standard one for the HBSC study. This is a collaborative WHO study in which more than  
8  
9 40 Western countries (including Spain) have participated, so that our use of the standard  
10  
11 methodology implies the comparability of our results at an international level. The measurement  
12  
13 of health status using subjective health scales, as in this present study, has been validated in  
14  
15 previous studies,<sup>18,21,22,36,37</sup> and such scales are considered to be useful tools especially in the  
16  
17 stage of adolescence, when psychological aspects are so important in the feeling of well-being  
18  
19 among young people.  
20  
21  
22  
23  
24  
25

## 26 CONCLUSIONS

27  
28 To sum up, an association was found between the frequency of undertaking MVPA and the  
29  
30 health status of adolescents enrolled in schools in Spain. A linear trend was found for self-rated  
31  
32 health, health complaints and for satisfaction with life. For health-related quality of life the  
33  
34 relationship was quadratic. The protective effect of MVPA on health was detected from very  
35  
36 low levels, below those established by current recommendations. In general, the effect on health  
37  
38 produced lower results in females than in males, a finding that needs to be explained by  
39  
40 subsequent research.  
41  
42  
43  
44  
45  
46

47 **Acknowledgments:** We thank the teachers, principals and participants for their generous  
48  
49 contribution to this study.  
50  
51

52 **Contributors:** All authors were involved in the development of the design of the study. PR, FR  
53  
54 and CM coordinated the field work and collected the data. IG, RB, MM and RP conducted the  
55  
56  
57  
58  
59  
60

1  
2  
3 analyses. IG and RB prepared the first draft. All authors contributed to the interpretation of data  
4  
5 and revision of the manuscript. All authors approved the final version.  
6  
7

8 **Funding:** This study has been funded by the *Consejo Superior de Deportes* [National Sports  
9  
10 Council] and the *Ministerio de Sanidad, Servicios Sociales e Igualdad* [Ministry of Health and  
11  
12 Social Policy].  
13

14 **Competing interests:** None.  
15  
16

17 **Ethics approval:** This study was approved by the Institutional Review Board of the Carlos III  
18  
19 Institute of Health.  
20  
21

22 **Provenance and peer review:** Not commissioned; externally peer reviewed.  
23  
24

25 **Data sharing statement:** Full results of the Spanish HBSC study are available at  
26  
27 [http://www.msps.es/profesionales/saludPublica/prevPromocion/promocion/saludJovenes/estudi](http://www.msps.es/profesionales/saludPublica/prevPromocion/promocion/saludJovenes/estudioHBSC/nacional_hbsc.htm)  
28  
29 [oHBSC/nacional\\_hbsc.htm](http://www.msps.es/profesionales/saludPublica/prevPromocion/promocion/saludJovenes/estudioHBSC/nacional_hbsc.htm)  
30  
31  
32  
33  
34  
35  
36  
37  
38  
39  
40  
41  
42  
43  
44  
45  
46  
47  
48  
49  
50  
51  
52  
53  
54  
55  
56  
57  
58  
59  
60



## REFERENCES

1. WHO. Global Strategy on Diet, Physical Activity and Health.  
[http://www.who.int/dietphysicalactivity/strategy/eb11344/strategy\\_english\\_web.pdf](http://www.who.int/dietphysicalactivity/strategy/eb11344/strategy_english_web.pdf) (accessed Dec 2012).
2. Biddle SJ, Asare M. Physical activity and mental health in children and adolescents: a review of reviews. *Br J Sports Med* 2011, 45:886-95.
3. Hallal PC, Victora CG, Azevedo MR, *et al.* Adolescent physical activity and health: a systematic review. *Sports Med* 2006, 36:1019-30.
4. Janssen I, Leblanc AG. Systematic review of the health benefits of physical activity and fitness in school-aged children and youth. *Int J Behav Nutr Phys Act* 2010, 7:40.
5. Strong WB, Malina RM, Blimkie CJ, *et al.* Evidence based physical activity for school-age youth. *J Pediatr* 2005, 146:732-7.
6. Physical Activity Guidelines Advisory Committee report, 2008. To the Secretary of Health and Human Services. Part A: executive summary. *Nutr Rev* 2009, 67:114-20.
7. Janssen I. Physical activity guidelines for children and youth. *Can J Public Health* 2007, 98 Suppl 2:109-21.
8. Fedewa A, Ahn S. The effects of physical activity and physical fitness on children's achievement and cognitive outcomes: a meta-analysis. *Res Q Exerc Sport* 2011, 82:521-35.
9. Abu-Omar K, Rutten A, Robine JM. Self-rated health and physical activity in the European Union. *Soz Praventivmed* 2004, 49:235-42.
10. Haennel RG, Lemire F. Physical activity to prevent cardiovascular disease. How much is enough? *Can Fam Physician* 2002, 48:65-71.

- 1  
2  
3 11. Kim K, Shin YJ, Nam JH, *et al.* A dose-response relationship between types of physical activity  
4 and distress. *J Korean Med Sci* 2008, 23:218-25.  
5  
6  
7  
8 12. Lee IM, Skerrett PJ. Physical activity and all-cause mortality: what is the dose-response relation?  
9  
10 *Med Sci Sports Exerc* 2001, 33 Suppl 6:459-71.  
11  
12  
13 13. Martin CK, Church TS, Thompson AM, *et al.* Exercise dose and quality of life: a randomized  
14 controlled trial. *Arch Intern Med* 2009, 169:269-78.  
15  
16  
17 14. Mayer-Davis EJ, D'Agostino R, Jr., Karter AJ, *et al.* Intensity and amount of physical activity in  
18 relation to insulin sensitivity: the Insulin Resistance Atherosclerosis Study. *JAMA* 1998, 279:669-  
19 74.  
20  
21  
22  
23  
24 15. Ohkawara K, Tanaka S, Miyachi M, *et al.* A dose-response relation between aerobic exercise and  
25 visceral fat reduction: systematic review of clinical trials. *Int J Obes (Lond)* 2007, 31:1786-97.  
26  
27  
28  
29 16. Lollgen H, Bockenhoff A, Knapp G. Physical activity and all-cause mortality: an updated meta-  
30 analysis with different intensity categories. *Int J Sports Med* 2009, 30:213-24.  
31  
32  
33  
34 17. Ravens-Sieberer U, Torsheim T, Hetland J, *et al.* Subjective health, symptom load and quality of  
35 life of children and adolescents in Europe. *Int J Public Health* 2009, 54 Suppl 2:151-9.  
36  
37  
38  
39 18. Ravens-Sieberer U, Erhart M, Wille N, *et al.* Generic health-related quality-of-life assessment in  
40 children and adolescents: methodological considerations. *Pharmacoeconomics* 2006, 24:1199-  
41 220.  
42  
43  
44  
45 19. Sallis JF, Prochaska JJ, Taylor WC. A review of correlates of physical activity of children and  
46 adolescents. *Med Sci Sports Exerc* 2000, 32:963-75.  
47  
48  
49  
50 20. Currie C, Nic GS, Godeau E. The Health Behaviour in School-aged Children: WHO  
51 Collaborative Cross-National (HBSC) study: origins, concept, history and development 1982-  
52 2008. *Int J Public Health* 2009, 54 Suppl 2:131-9.  
53  
54  
55  
56  
57  
58  
59  
60

- 1  
2  
3  
4  
5  
6  
7  
8  
9  
10  
11  
12  
13  
14  
15  
16  
17  
18  
19  
20  
21  
22  
23  
24  
25  
26  
27  
28  
29  
30  
31  
32  
33  
34  
35  
36  
37  
38  
39  
40  
41  
42  
43  
44  
45  
46  
47  
48  
49  
50  
51  
52  
53  
54  
55  
56  
57  
58  
59  
60
21. Curries, CE, Gabhainn, SN, Godeau, E. Inequalities in young people Health. HBSC International report from the 2005/2006 Survey. WHO Regional Office for Europe, Copenhagen, Denmark. [http://www.euro.who.int/\\_data/assets/pdf\\_file/0005/53852/E91416.pdf](http://www.euro.who.int/_data/assets/pdf_file/0005/53852/E91416.pdf) (accessed Dec 2012).
  22. Erhart M, Ottova V, Gaspar T, *et al.* Measuring mental health and well-being of school-children in 15 European countries using the KIDSCREEN-10 Index. *Int J Public Health* 2009, 54 Suppl 2:160-6.
  23. Cole TJ, Bellizzi MC, Flegal KM, *et al.* Establishing a standard definition for child overweight and obesity worldwide: international survey. *BMJ* 2000, 320:1240-3.
  24. Currie C, Molcho M, Boyce W, *et al.* Researching health inequalities in adolescents: the development of the Health Behaviour in School-Aged Children (HBSC) family affluence scale. *Soc Sci Med* 2008, 66:1429-36.
  25. Greenland S. Dose-response and trend analysis in epidemiology: alternatives to categorical analysis. *Epidemiology* 1995, 6:356-65.
  26. Iannotti RJ, Janssen I, Haug E, *et al.* Interrelationships of adolescent physical activity, screen-based sedentary behaviour, and social and psychological health. *Int J Public Health* 2009, 54 Suppl 2:191-8.
  27. Hamer M, Stamatakis E, Steptoe A. Dose-response relationship between physical activity and mental health: the Scottish Health Survey. *Br J Sports Med* 2009, 43:1111-4.
  28. Leblanc AG, Janssen I. Dose-response relationship between physical activity and dyslipidemia in youth. *Can J Cardiol* 2010, 26:201-5.
  29. Mark AE, Janssen I. Dose-response relation between physical activity and blood pressure in youth. *Med Sci Sports Exerc* 2008, 40:1007-12.

- 1  
2  
3 30. Mavaddat N, Kinmonth AL, Sanderson S, *et al.* What determines Self-Rated Health (SRH)? A  
4 cross-sectional study of SF-36 health domains in the EPIC-Norfolk cohort. *J Epidemiol*  
5 *Community Health* 2011, 65:800-6.  
6  
7  
8  
9  
10 31. Ravens-Sieberer U, Erhart M, Torsheim T, Hetland J, *et al.* An international scoring system for  
11 self-reported health complaints in adolescents. *Eur J Public Health* 2008, 18:294-9.  
12  
13  
14 32. Galan I, Meseguer CM, Herruzo R, *et al.* Self-rated health according to amount, intensity and  
15 duration of leisure time physical activity. *Prev Med* 2010, 51:378-83.  
16  
17  
18  
19 33. Van Der HK, Paw MJ, Twisk JW, *et al.* A brief review on correlates of physical activity and  
20 sedentariness in youth. *Med Sci Sports Exerc* 2007, 39:1241-50.  
21  
22  
23  
24 34. Ministry of Health, Social Services and Equality, 2012. National Health Survey 2006.  
25  
26 <http://www.msps.es/estadEstudios/estadisticas/encuestaNacional/encuesta2006.htm> (accessed  
27 Dec 2012).  
28  
29  
30  
31 35. Martinez-Gomez D, Martinez-De-Haro V, Del-Campo J, *et al.* [Validity of four questionnaires to  
32 assess physical activity in Spanish adolescents]. *Gac Sanit* 2009, 23:512-7.  
33  
34  
35  
36 36. Boardman JD. Self-rated health among U.S. adolescents. *J Adolesc Health* 2006, 38:401-8.  
37  
38  
39 37. Fosse NE, Haas SA. Validity and stability of self-reported health among adolescents in a  
40 longitudinal, nationally representative survey. *Pediatrics* 2009, 123:e496-e501.  
41  
42  
43  
44  
45  
46  
47  
48  
49  
50  
51  
52  
53  
54  
55  
56  
57  
58  
59  
60

Table 1. Description of the sample and distribution of optimal self-rated health, less health complaints, high satisfaction with life and health-related quality of life, according to individual variables. Spanish adolescents aged 11–18 years, 2006.

|                                     |                       | Optimal Self-reported health |       | Less health complaints |       | High satisfaction with life |       | Health-related quality of life |       |
|-------------------------------------|-----------------------|------------------------------|-------|------------------------|-------|-----------------------------|-------|--------------------------------|-------|
|                                     |                       | N                            | %     | N                      | %     | N                           | %     | N                              | Mean  |
| MVPA                                | Global                | 17467                        | 91.1  | 16803                  | 67.4  | 17358                       | 90.9  | 16560                          | 47.1  |
|                                     | Never                 | 1032                         | 80.1* | 1003                   | 54.1* | 1024                        | 82.3* | 985                            | 42.6* |
|                                     | 1-2 days              | 4184                         | 87.5  | 4007                   | 62.8  | 4158                        | 87.4  | 3958                           | 44.3  |
|                                     | 3-4 days              | 5592                         | 90.8  | 5381                   | 66.3  | 5561                        | 91.3  | 5321                           | 46.2  |
|                                     | 5-6 days              | 3259                         | 94.8  | 3139                   | 72.8  | 3244                        | 93.1  | 3105                           | 48.2  |
| Sex                                 | 7 days                | 3400                         | 95.9  | 3273                   | 74.1  | 3371                        | 95.2  | 3191                           | 52.5  |
|                                     | Male                  | 8194                         | 93.3* | 7899                   | 76.7* | 8126                        | 91.9* | 7754                           | 48.3* |
| Age                                 | Female                | 9273                         | 89.3  | 8904                   | 59.5  | 9232                        | 90.0  | 8807                           | 46.1  |
|                                     | 10-12                 | 5168                         | 95.8* | 4838                   | 68.6  | 5124                        | 94.9* | 4707                           | 52.5* |
|                                     | 13-16                 | 8852                         | 90.1  | 8589                   | 67.6  | 8796                        | 89.8  | 8469                           | 45.6  |
| Born in Spain                       | 17-18                 | 3447                         | 86.8  | 3376                   | 65.1  | 3438                        | 87.7  | 3385                           | 43.2  |
|                                     | Yes                   | 16323                        | 91.1  | 15726                  | 67.7* | 16228                       | 91.2* | 15499                          | 47.2  |
| Smoking                             | No                    | 1144                         | 91.2  | 1077                   | 62.9  | 1130                        | 85.3  | 1062                           | 45.7  |
|                                     | Non-smoker            | 11254                        | 94.5* | 10746                  | 70.6* | 11177                       | 94.0* | 10553                          | 49.3* |
|                                     | Smoker                | 2857                         | 80.9  | 2799                   | 56.6  | 2846                        | 83.7  | 2780                           | 42.8  |
| Consumption of alcohol              | Ex-smoker             | 3356                         | 89.2  | 3258                   | 66.6  | 3335                        | 86.9  | 3228                           | 44.1  |
|                                     | Never                 | 7918                         | 95.4* | 7504                   | 70.4* | 7853                        | 94.3* | 7334                           | 50.7* |
|                                     | Rarely                | 3976                         | 89.9  | 3842                   | 65.2  | 3960                        | 88.9  | 3802                           | 45.4  |
|                                     | Monthly               | 2298                         | 88.1  | 2243                   | 66.3  | 2290                        | 87.2  | 2240                           | 43.5  |
| Body-mass index                     | Weekly or daily       | 3275                         | 85.2  | 3214                   | 64.2  | 3255                        | 87.9  | 3185                           | 43.9  |
|                                     | Normal or underweight | 12320                        | 92.5* | 11903                  | 68.2* | 12241                       | 91.5* | 11732                          | 47.0  |
|                                     | Overweight            | 2264                         | 86.7  | 2150                   | 67.6  | 2247                        | 90.3  | 2370                           | 47.1  |
|                                     | Obese                 | 348                          | 77.4  | 329                    | 58.0  | 349                         | 83.0  | 325                            | 46.6  |
| Consumption of fruit and vegetables | NR                    | 2535                         | 90.4  | 2421                   | 64.6  | 2521                        | 89.4  | 2535                           | 47.2  |
|                                     | Quartile 1            | 4786                         | 88.2* | 4597                   | 64.1* | 4754                        | 88.8* | 4521                           | 45.8* |
|                                     | Quartile 2            | 3698                         | 91.5  | 3562                   | 67.5  | 3676                        | 91.5  | 3509                           | 46.5  |
|                                     | Quartile 3            | 4302                         | 92.5  | 4136                   | 69.7  | 4276                        | 92.2  | 4083                           | 47.2  |
|                                     | Quartile 4            | 4681                         | 92.6  | 4508                   | 68.5  | 4652                        | 91.2  | 4448                           | 48.7  |
| Breakfast during the week           | Every day             | 12830                        | 93.2* | 12355                  | 70.4* | 12756                       | 92.6* | 12146                          | 48.1* |
|                                     | Not every day         | 4637                         | 85.5  | 4448                   | 59.1  | 4602                        | 86.1  | 4415                           | 44.3  |
| Time spent TV and computers         | Quartile 1            | 4001                         | 91.1  | 3835                   | 68.7* | 3983                        | 91.5* | 4093                           | 48.0* |
|                                     | Quartile 2            | 4305                         | 91.1  | 4136                   | 69.4  | 4291                        | 91.8  | 4109                           | 47.0  |
|                                     | Quartile 3            | 4315                         | 91.7  | 4185                   | 68.8  | 4289                        | 91.5  | 4315                           | 47.0  |
|                                     | Quartile 4            | 4157                         | 90.2  | 3997                   | 62.8  | 4117                        | 88.7  | 3956                           | 46.2  |
|                                     | NR                    | 689                          | 92.6  | 650                    | 65.4  | 678                         | 89.3  | 628                            | 48.6  |
| Time spent studying/ homework       | Quartile 1            | 3718                         | 89.3* | 3580                   | 68.8* | 3698                        | 87.1* | 3502                           | 46.3* |
|                                     | Quartile 2            | 3636                         | 92.2  | 3485                   | 69.3  | 3616                        | 91.9  | 3431                           | 47.9  |
|                                     | Quartile 3            | 5182                         | 92.4  | 4979                   | 68.8  | 5148                        | 92.5  | 4936                           | 47.7  |
|                                     | Quartile 4            | 4548                         | 90.5  | 4399                   | 62.9  | 4529                        | 91.5  | 4347                           | 46.3  |
|                                     | NR                    | 383                          | 89.4  | 360                    | 69.3  | 367                         | 88.6  | 345                            | 48.4  |
| Academic achievement                | Very good             | 2809                         | 96.3* | 2692                   | 71.8* | 2796                        | 96.4* | 2644                           | 52.4* |
|                                     | Good                  | 7375                         | 94.0  | 7073                   | 69.7  | 7327                        | 94.2  | 6988                           | 48.2  |
|                                     | Average               | 5847                         | 87.4  | 5645                   | 65.3  | 5811                        | 87.3  | 5579                           | 44.2  |
|                                     | Low                   | 1436                         | 79.7  | 1393                   | 54.0  | 1424                        | 75.3  | 1350                           | 41.7  |

\*  $p < 0.05$

MVPA: Moderate-to-Vigorous Physical Activity

NR: Non-response

Table 2. Description of the sample and distribution of optimal self-rated health, less health complaints, high satisfaction with life and health-related quality of life, according to family variables. Spanish adolescents aged 11–18 years, 2006.

|                                                       | Optimal Self-reported health |       | Less health complaints |       | High satisfaction with life |       | Health-related quality of life |       |
|-------------------------------------------------------|------------------------------|-------|------------------------|-------|-----------------------------|-------|--------------------------------|-------|
|                                                       | N                            | %     | N                      | %     | N                           | %     | N                              | Mean  |
| Employment situation of father                        |                              |       |                        |       |                             |       |                                |       |
| Paid employment                                       | 16187                        | 91.5* | 15581                  | 67.8* | 16089                       | 91.3* | 15364                          | 47.2* |
| No paid employment                                    | 643                          | 86.9  | 615                    | 63.0  | 639                         | 85.4  | 603                            | 45.4  |
| Don't know                                            | 79                           | 90.3  | 74                     | 52.9  | 78                          | 91.5  | 73                             | 43.3  |
| No father                                             | 558                          | 85.4  | 533                    | 59.8  | 552                         | 82.0  | 521                            | 44.3  |
| Employment situation of mother                        |                              |       |                        |       |                             |       |                                |       |
| Paid employment                                       | 12355                        | 91.0  | 11885                  | 67.1  | 12274                       | 90.8* | 11706                          | 47.1* |
| No paid employment                                    | 4940                         | 91.5  | 4749                   | 68.3  | 4911                        | 91.4  | 4694                           | 47.0  |
| Don't know                                            | 48                           | 90.9  | 47                     | 59.1  | 48                          | 91.4  | 44                             | 47.5  |
| No mother                                             | 124                          | 83.7  | 122                    | 58.7  | 125                         | 78.0  | 117                            | 45.2  |
| Socioeconomic status                                  |                              |       |                        |       |                             |       |                                |       |
| Low                                                   | 2552                         | 86.2* | 2450                   | 62.6* | 2537                        | 84.5* | 2403                           | 45.2* |
| Average                                               | 8180                         | 91.2  | 7876                   | 66.7  | 8136                        | 90.9  | 7731                           | 46.9  |
| High                                                  | 6735                         | 92.9  | 6477                   | 69.9  | 6685                        | 93.2  | 6427                           | 48.0  |
| Country of birth of father                            |                              |       |                        |       |                             |       |                                |       |
| Spain                                                 | 15941                        | 91.1  | 15369                  | 67.6  | 15854                       | 91.2* | 15160                          | 47.1  |
| Other countries                                       | 1526                         | 91.1  | 1434                   | 64.7  | 1504                        | 86.2  | 1401                           | 46.4  |
| Country of birth of mother                            |                              |       |                        |       |                             |       |                                |       |
| Spain                                                 | 16161                        | 91.1  | 15572                  | 67.7* | 16071                       | 91.1* | 15350                          | 47.1  |
| Other countries                                       | 1306                         | 91.9  | 1231                   | 62.4  | 1287                        | 87.3  | 1211                           | 46.1  |
| Type of household                                     |                              |       |                        |       |                             |       |                                |       |
| Both parents                                          | 14773                        | 92.0* | 14238                  | 68.4* | 14684                       | 91.9* | 14016                          | 47.3* |
| Single parent                                         | 1771                         | 86.9  | 1690                   | 62.2  | 1754                        | 85.0  | 1674                           | 45.7  |
| Blended                                               | 587                          | 83.0  | 562                    | 59.3  | 587                         | 82.6  | 556                            | 44.2  |
| Others                                                | 336                          | 85.3  | 313                    | 61.3  | 333                         | 86.8  | 315                            | 46.8  |
| Number of adults in the household                     |                              |       |                        |       |                             |       |                                |       |
| 2                                                     | 13606                        | 91.7* | 13606                  | 64.1* | 13521                       | 91.2* | 12912                          | 47.3  |
| 0,1,3,4,5                                             | 3861                         | 88.8  | 3861                   | 68.3  | 3837                        | 89.3  | 3649                           | 46.4  |
| Number of minors in the household                     |                              |       |                        |       |                             |       |                                |       |
| 1,2,3                                                 | 16097                        | 91.1  | 16097                  | 60.3* | 16008                       | 91.0  | 15303                          | 47.1  |
| >3                                                    | 1370                         | 90.6  | 1370                   | 68.0  | 1350                        | 88.8  | 1258                           | 46.8  |
| Satisfaction: family relationships <sup>a</sup>       |                              |       |                        |       |                             |       |                                |       |
| Good                                                  | 15537                        | 93.0* | 15537                  | 45.2* | 15442                       | 94.2* | 14722                          | 48.0* |
| Fair-bad                                              | 1930                         | 75.9  | 1930                   | 70.1  | 1916                        | 64.2  | 1839                           | 39.4  |
| Satisfaction: relationships with friends <sup>a</sup> |                              |       |                        |       |                             |       |                                |       |
| Good                                                  | 16412                        | 92.0* | 16412                  | 48.5* | 16310                       | 92.3* | 15560                          | 47.5* |
| Fair-bad                                              | 1055                         | 77.1  | 1055                   | 68.6  | 1048                        | 68.5  | 1001                           | 40.0  |

\* p<0.05

<sup>a</sup> Good: score 7-10; Fair-bad: score 0-6

Table 3. Logistic models. Association between the amount of moderate-to-vigorous physical activity and optimal self-rated health, less health complaints and high satisfaction with life. Spanish adolescents aged 11–18 years, 2006.

|                                    | Males               |        |  | Females             |        |
|------------------------------------|---------------------|--------|--|---------------------|--------|
|                                    | OR* (95% CI)        | P      |  | OR* (95% CI)        | P      |
| <b>Optimal self-rated health</b>   |                     |        |  |                     |        |
| Frequency of undertaking MVPA      |                     |        |  |                     |        |
| Never                              | 1 (ref)             |        |  | 1 (ref)             |        |
| 1-2 days                           | 2.37 (1.56 to 3.58) | <0.001 |  | 1.20 (0.85 to 1.69) | 0.282  |
| 3-4 days                           | 2.34 (1.44 to 3.81) | 0.001  |  | 1.51 (1.06 to 2.14) | 0.020  |
| 5-6 days                           | 4.60 (2.60 to 8.13) | <0.001 |  | 2.28 (1.47 to 3.52) | <0.001 |
| 7 days                             | 4.05 (2.38 to 6.89) | <0.001 |  | 2.14 (1.37 to 3.34) | 0.001  |
| Linear trend P-value               | <0.001              |        |  | <0.001              |        |
| Quadratic trend P-value            | 0.325               |        |  | 0.850               |        |
| <b>Less health complaints</b>      |                     |        |  |                     |        |
| Frequency of undertaking MVPA      |                     |        |  |                     |        |
| Never                              | 1 (ref)             |        |  | 1 (ref)             |        |
| 1-2 days                           | 1.66 (1.14 to 2.42) | 0.008  |  | 1.16 (0.90 to 1.49) | 0.226  |
| 3-4 days                           | 1.65 (1.14 to 2.39) | 0.007  |  | 1.21 (0.93 to 1.58) | 0.143  |
| 5-6 days                           | 2.09 (1.47 to 2.96) | <0.001 |  | 1.46 (1.10 to 1.93) | 0.009  |
| 7 days                             | 1.94 (1.38 to 2.73) | <0.001 |  | 1.32 (0.97 to 1.80) | 0.076  |
| Linear trend P-value               | 0.001               |        |  | 0.021               |        |
| Quadratic trend P-value            | 0.216               |        |  | 0.463               |        |
| <b>High satisfaction with life</b> |                     |        |  |                     |        |
| Frequency of undertaking MVPA      |                     |        |  |                     |        |
| Never                              | 1 (ref)             |        |  | 1 (ref)             |        |
| 1-2 days                           | 1.99 (1.20 to 3.31) | 0.007  |  | 0.93 (0.63 to 1.36) | 0.722  |
| 3-4 days                           | 1.52 (0.90 to 2.55) | 0.111  |  | 1.44 (0.99 to 2.10) | 0.056  |
| 5-6 days                           | 2.02 (1.17 to 3.49) | 0.011  |  | 1.56 (0.98 to 2.49) | 0.059  |
| 7 days                             | 1.94 (1.09 to 3.44) | 0.023  |  | 2.00 (1.19 to 3.35) | 0.008  |
| Linear trend P-value               | 0.128               |        |  | <0.001              |        |
| Quadratic trend P-value            | 0.661               |        |  | 0.975               |        |

\* Adjusted for age, country of birth, smoking, alcohol consumption, BMI, consumption of fruit and vegetables, daily breakfast, time spent watching TV using computers, time spent studying, academic achievement, employment situation of the father and mother, socioeconomic status, country of birth of the father and mother, type of household, number of adults and number of minors in the household, satisfaction with family relationships and with friends.

Table 4. Linear models. Association between the amount of moderate-to-vigorous physical activity and health-related quality of life. Spanish adolescents aged 11–18 years, 2006.

|                               | Males               |        | Females               |        |
|-------------------------------|---------------------|--------|-----------------------|--------|
|                               | $\beta$ * (95% CI)  | P      | $\beta$ * (95% CI)    | P      |
| Frequency of undertaking MVPA |                     |        |                       |        |
| Never                         | 0 (ref)             |        | 0 (ref)               |        |
| 1-2 days                      | 1.61 (0.29 to 2.93) | 0.017  | 0.19 (- 0.71 to 1.10) | 0.676  |
| 3-4 days                      | 1.87 (0.50 to 3.24) | 0.007  | 1.19 (0.37 to 2.02)   | 0.005  |
| 5-6 days                      | 3.03 (1.74 to 4.31) | <0.001 | 2.79 (1.76 to 3.82)   | <0.001 |
| 7 days                        | 5.08 (3.73 to 6.43) | <0.001 | 5.09 (3.86 to 6.32)   | <0.001 |
| Linear trend P-value          | <0.001              |        | <0.001                |        |
| Quadratic trend P-value       | 0.006               |        | <0.001                |        |

\* Adjusted for age, country of birth, smoking, alcohol consumption, BMI, consumption of fruit and vegetables, daily breakfast, time spent watching TV and using computers, time spent studying, academic achievement, employment situation of the father and mother, socioeconomic status, country of birth of the father and mother, type of household, number of adults and number of minors in the household, satisfaction with family relationships and with friends.



1  
2  
3 Figure 1. Dose-response relationship of the amount of Moderate-to-Vigorous Physical Activity  
4 (MVPA) with optimal self-rated health, less health complaints, high satisfaction with life, and  
5 health-related quality of life among Spanish adolescents aged 11–18 years.  
6  
7  
8

9 *Footnote:*

10  
11 Curves represent adjusted odds ratios or mean differences (solid lines) and their 95% confidence  
12 intervals (dashed lines) based on restricted quadratic splines for the amount of MVPA with  
13 knots at 1, 3.5, and 6 days/week. The reference value (odds ratio = 1 and mean difference = 0)  
14 was set at 0 days/week of moderate-vigorous physical activity. Odds ratios and mean  
15 differences were obtained from logistic and linear regression models accounting for the complex  
16 survey and adjusted for personal and familial risk factors (see Methods). Bars represent the  
17 weighted bar charts of the amount of MVPA among males and females.  
18  
19  
20  
21  
22  
23  
24  
25  
26  
27  
28  
29  
30  
31  
32  
33  
34  
35  
36  
37  
38  
39  
40  
41  
42  
43  
44  
45  
46  
47  
48  
49  
50  
51  
52  
53  
54  
55  
56  
57  
58  
59  
60

1  
2  
3  
4  
5  
6  
7  
8  
9  
10  
11  
12  
13  
14  
15  
16  
17  
18  
19  
20  
21  
22  
23  
24  
25  
26  
27  
28  
29  
30  
31  
32  
33  
34  
35  
36  
37  
38  
39  
40  
41  
42  
43  
44  
45  
46  
47  
48  
49  
50  
51  
52  
53  
54  
55  
56  
57  
58  
59  
60

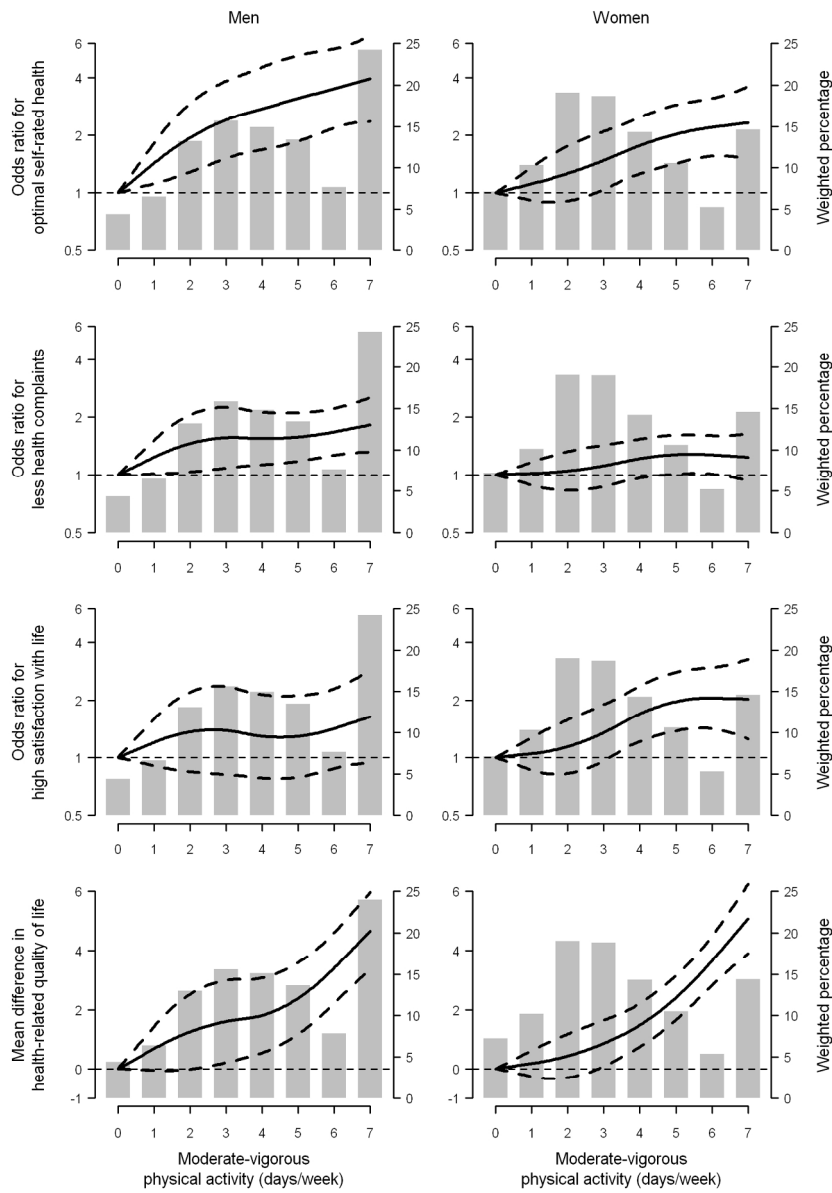

142x203mm (300 x 300 DPI)

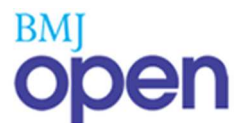

**Physical activity and health status among adolescents: a cross-sectional population-based study**

|                                 |                                                                                                                                                                                                                                                                                                                                                                                                 |
|---------------------------------|-------------------------------------------------------------------------------------------------------------------------------------------------------------------------------------------------------------------------------------------------------------------------------------------------------------------------------------------------------------------------------------------------|
| Journal:                        | <i>BMJ Open</i>                                                                                                                                                                                                                                                                                                                                                                                 |
| Manuscript ID:                  | bmjopen-2013-002644.R1                                                                                                                                                                                                                                                                                                                                                                          |
| Article Type:                   | Research                                                                                                                                                                                                                                                                                                                                                                                        |
| Date Submitted by the Author:   | 25-Mar-2013                                                                                                                                                                                                                                                                                                                                                                                     |
| Complete List of Authors:       | Galán, Iñaki; National Centre of Epidemiology, Boix, Raquel; National Centre of Epidemiology, Medrano, María José; National Centre of Epidemiology, Ramos, Pilar; Faculty of Psychology, University of Seville, Spain, Rivera, Francisco; University of Huelva, Pastor-Barriuso, Roberto; National Centre of Epidemiology, Moreno, Carmen; Faculty of Psychology, University of Seville, Spain, |
| <b>Primary Subject Heading</b>: | Public health                                                                                                                                                                                                                                                                                                                                                                                   |
| Secondary Subject Heading:      | Sports and exercise medicine                                                                                                                                                                                                                                                                                                                                                                    |
| Keywords:                       | Physical activity, Health status, Adolescents                                                                                                                                                                                                                                                                                                                                                   |
|                                 |                                                                                                                                                                                                                                                                                                                                                                                                 |

SCHOLARONE™  
Manuscripts

1  
2  
3 **Physical activity and self-reported health status among adolescents: a cross-sectional**  
4 **population-based study**  
5  
6

7 **Galán I,<sup>1,2</sup> Boix R,<sup>1</sup> Medrano MJ,<sup>1</sup> Ramos P,<sup>3</sup> Rivera F,<sup>4</sup> Pastor-Barriuso R,<sup>1,5</sup> Moreno C<sup>3</sup>**  
8  
9

10  
11  
12 <sup>1</sup> *Centro Nacional de Epidemiología. Instituto de Salud Carlos III* [National Centre of  
13 Epidemiology, Carlos III Institute of Health], Madrid (Spain)  
14

15  
16 <sup>2</sup> *Departamento de Medicina Preventiva y Salud Pública. Facultad de Medicina.*  
17 *Universidad Autónoma de Madrid* [Department of Preventive Medicine and Public  
18 Health, Faculty of Medicine, Autonomous University of Madrid], Madrid (Spain)  
19

20  
21 <sup>3</sup> *Departamento de Psicología Evolutiva y de la Educación. Facultad de Psicología.*  
22 *Universidad de Sevilla* [Department of Developmental and Educational Psychology,  
23 Faculty of Psychology, University of Seville], Seville (Spain)  
24  
25

26  
27 <sup>4</sup> *Departamento de Psicología Clínica, Experimental y Social. Universidad de Huelva*  
28 [Department of Clinical, Experimental and Social Psychology, University of Huelva],  
29 Huelva (Spain)  
30  
31

32  
33 <sup>5</sup> Consortium for Biomedical Research in Epidemiology and Public Health  
34 (CIBERESP), Spain  
35  
36  
37  
38  
39  
40  
41

42 **Keywords:** Physical activity, health status, adolescents  
43

44 **Word count:**  
45  
46  
47  
48

49 **Corresponding author:**

50 Iñaki Galán

51 Centro Nacional de Epidemiología, Madrid (Spain)

52 c/ Monforte de Lemos 5. CP: 28029

53 Telephone: +34 918222679

54 Fax: +34 913877815

55 e-mail: [igalan@isciii.es](mailto:igalan@isciii.es)  
56  
57  
58  
59  
60

## Abstract

**Objectives:** Little is known about the dose-response relationship between physical activity and health benefits among young people. Our objective was to analyse the association between the frequency of undertaking Moderate-to-Vigorous Physical Activity (MVPA) and the self-reported health status of the adolescent population.

**Design:** Cross-sectional study.

**Setting:** All regions of Spain.

**Participants:** Students aged 11-18 years participating in the Spanish Health Behaviour in School-aged Children (HBSC) survey 2006. A total of 375 schools and 21,188 students were selected.

**Main outcomes:** The frequency of undertaking MVPA was measured by questionnaire, as were the following four health indicators: self-rated health, health complaints, satisfaction with life, and health-related quality of life. Linear and logistic regression models were used to analyse the association, adjusting for potential confounding variables and the modelling of the dose-response relationship.

**Results:** As the frequency of MVPA increased, the association with health benefits was stronger. A linear trend ( $p < 0.05$ ) was found for self-rated health and health complaints in males and females, and for satisfaction with life among females; for health-related quality of life, this relationship was quadratic for both sexes ( $p < 0.05$ ). For self-reported health and health complaints, the effect was found to be of greater magnitude in males than in females and, in all scales, the benefits were observed from the lowest frequencies of MVPA, especially in males.

**Conclusions:** A protective effect of MVPA was found in both sexes for the four health indicators studied, and this activity had a gradient effect. Among males, health benefits

1  
2  
3  
4  
5  
6  
7  
8  
9  
10  
11  
12  
13  
14  
15  
16  
17  
18  
19  
20  
21  
22  
23  
24  
25  
26  
27  
28  
29  
30  
31  
32  
33  
34  
35  
36  
37  
38  
39  
40  
41  
42  
43  
44  
45  
46  
47  
48  
49  
50  
51  
52  
53  
54  
55  
56  
57  
58  
59  
60

were detected from very low levels of physical activity and the magnitude of the relationship was greater than that for females.

For peer review only

## Article summary

### Article focus

- Although it is recommended that all adolescents should undertake 60 minutes of daily Moderate-to-Vigorous Physical Activity (MVPA), little is known about the nature of the relationship in this population, and whether or not the effect varies depending on age and sex.
- We examined cross-sectional associations between the frequency of undertaking self-reported MVPA and the health status of the adolescent population, using subjective health scales that are considered to be useful tools especially in the stage of adolescence, when psychological aspects are so important in the feeling of well-being among young people.

### Key messages

- The protective effect of MVPA on health was detected from very low levels, below those established by current recommendations.
- A linear trend was found for self-rated health, health complaints and for satisfaction with life. For health-related quality of life the relationship was quadratic.
- The positive effect on health produced lower results in females than in males.

### Strengths and limitations of this study

- The main strength is the representativeness and large size of the sample. The methodology employed is the standard one for the HBSC study in which more than 40 Western countries have participated.
- A major limitation is the cross-sectional nature of the study. Moreover, the measurement of health status using subjective health scales and the estimation of MVPA are both based on self-reported information.

## INTRODUCTION

According to the World Health Organization (WHO)<sup>1</sup>, physical inactivity is the fourth most important risk factor affecting global mortality, to which nearly 6% of all deaths are attributed. In the adolescent population, short-term benefits related to Physical Activity (PA) are improvements in lipid profile, blood pressure, metabolic syndrome, muscular strength and bone density, together with a reduction in obesity and overweight levels, as well as a decrease in emotional problems and depressive symptoms.<sup>2-5</sup> Moreover, young people who undertake PA adopt healthy behaviour more easily and have better levels of academic achievement and cognitive functioning.<sup>4, 6-8</sup>

The dose-response relationship between physical activity and various health indicators has mainly been studied in the adult population,<sup>9-15</sup> where there is still a controversy about whether or not this relationship is linear.<sup>12,16</sup> Ekelund et al.,<sup>17</sup> in a pooled data analysis of 14 studies in children and adolescents, found a direct benefit between three tertiles of Moderate-to-Vigorous Physical Activity (MVPA) in relation to cardiometabolic outcomes. Although the WHO recommends that all children of 5-17 years of age take at least 60 minutes of daily MVPA,<sup>18</sup> little is known about the nature of the relationship in this population. Therefore, finding out the effect on health of several levels of PA could have important implications for improving the recommendations regarding this activity.

It should be emphasized that concepts underlying health status in children and adolescents differ from those for adults. As young people are still developing, the measurement of health status must be approached from a global and comprehensive perspective for each individual. Concepts such as 'subjective health' and 'health-related quality of life' cover complex physical, emotional, mental and social aspects.<sup>19,20</sup> Hence,



1  
2  
3 it is important to evaluate if the effect of the PA is distributed in a distinct way for the  
4  
5 different dimensions of health status.  
6

7  
8 Finally, although PA varies considerably depending on age and sex,<sup>21</sup> to our knowledge  
9  
10 there have been very few studies in the literature about the role that these variables play  
11  
12 regarding the effect of PA on health.<sup>4</sup>  
13

14  
15 The objective of this study was to analyse the association between the frequency of  
16  
17 undertaking MVPA and the different dimensions of adolescent health status, assessing if  
18  
19 this relationship differs according to age and sex.  
20  
21

## 22 23 24 25 **METHODS**

### 26 27 **Study population**

28  
29  
30 The source of information was the Health Behaviour in School-aged Children (HBSC)  
31  
32 study carried out in 2006.<sup>22</sup> The population was a representative sample of  
33  
34 preadolescents and adolescents, with an age range of 11-18 years, resident in Spain and  
35  
36 enrolled in school from the 5th year of primary school to the last year of upper  
37  
38 secondary school (2nd year of baccalaureate). A multistage stratified random sampling  
39  
40 was used, taking into account age strata (4 groups), region (17 autonomous  
41  
42 communities), school site (rural and urban), and type of school (public and private).  
43  
44 Initially, 480 schools were contacted of which 377 (103 private and 274 public schools)  
45  
46 agreed to participate in the study, which represented a response rate of 78.5%. On  
47  
48 average, three classes were selected in each school. A total of 22,350 questionnaires  
49  
50 were collected, although subsequently 539 were excluded because of non-response to  
51  
52 questions about sex and age, or lack of response to more than 50% of the questionnaire.  
53  
54  
55  
56  
57 The sample size was 21,811 participants. The study was carried out in spring 2006.  
58  
59  
60

1  
2  
3 Previously trained survey technicians visited the selected schools, where the students  
4  
5 completed an anonymous questionnaire during normal school hours.  
6

7  
8 This study was approved by the Institutional Review Board of the Carlos III Institute of  
9  
10 Health .  
11

### 12 13 **Study variables**

14  
15 Health status was measured using four indicators: 1) self-rated health was measured using  
16  
17 the question “*Would you say that your health is: excellent, good, fair or bad*”. Optimal  
18  
19 health status was categorized by a response of excellent or good, and sub-optimal health  
20  
21 status was categorized by a response of fair or bad. 2) The health complaints indicator  
22  
23 was assessed using a scale based on the HBSC-Symptom Checklist, which is a list of  
24  
25 eight physical and psychological symptoms (headaches, abdominal pain, backache,  
26  
27 feeling low, irritability, nervousness, sleeping difficulties and dizziness), to estimate their  
28  
29 frequency during the last six months. Having 2 or more symptoms with a frequency of  
30  
31 several times a week or daily was considered to define having noticeable subjective  
32  
33 health complaints.<sup>19</sup> 3) Satisfaction with life was estimated using the Cantril Ladder,<sup>23</sup> in  
34  
35 which, using a scale from 0 to 10, the participant was asked “*on which rung of the ladder*  
36  
37 *(scale from 0 to 10) do you feel you stand at this moment in your life?*”, with 0 being the  
38  
39 worst score and 10 the best. A score of 0 to 5 was categorized as dissatisfied, whereas a  
40  
41 score of 6 to 10 was categorized as satisfied.<sup>19</sup> 4) Health-related quality of life was  
42  
43 measured using the Kidscreen-10 index,<sup>24</sup> a series of 10 questions about mood, ability to  
44  
45 concentrate, energy, vitality, well-being, ability to have fun with friends. Each question  
46  
47 has five categories of response ranging from “never” to “always” or from “not at all” to  
48  
49 “extremely often”. The items fulfil the assumptions of the Rasch model. To make the  
50  
51 interpretation more applicable, the scores of the Rasch scales are translated into T-values  
52  
53  
54  
55  
56  
57  
58  
59  
60

1  
2  
3 with scale means of 50 and standard deviation of 10, with higher values indicating higher  
4  
5 health-related quality of life.<sup>24</sup>  
6

7  
8 The frequency of MVPA was measured using the question: “*in the last seven days,*  
9  
10 *considering moderate and vigorous activity... On how many days did you feel you were*  
11 *physically active for a total of 60 minutes per day?*” The response categories were from 0  
12  
13 to 7 days. This question, when compared with PA assessed by accelerometers in Spanish  
14  
15 adolescents, has shown an acceptable validation.<sup>25</sup>  
16  
17

18  
19 The following factors were considered as potentially confounding variables for the  
20  
21 association between health status and frequency of MVPA: 1) personal variables (sex,  
22  
23 age, country of birth, current smoker, alcohol consumption, body-mass index –calculated  
24  
25 as the ratio of weight in kg/height in m<sup>2</sup> from self-reported weight and height, and  
26  
27 defining overweight and obesity using the cut-off points proposed by Cole et al.,<sup>26</sup>  
28  
29 consumption of fruit and vegetables, daily breakfast, number of hours each day spent  
30  
31 watching television and using computers or game consoles, number of hours each day  
32  
33 spent doing school homework); 2) family variables (employment status of the father,  
34  
35 employment status of the mother, family purchasing power –measured by the Family  
36  
37 Affluence Scale,<sup>27</sup> an index estimated by four items: number of times that the adolescents  
38  
39 have been on holiday with their family in the last 12 months; does the family own a car or  
40  
41 van; does the student have his/her own bedroom; number of computers owned by the  
42  
43 family-, country of birth of the father, country of birth of the mother, type of household –  
44  
45 both parents, single parent, blended family–, number of minors in the household, number  
46  
47 of adults in the household); and 3) relationships with the school, the family and friends  
48  
49 (academic achievement, satisfaction with family relationships, satisfaction with  
50  
51 relationships with friends). The variables are categorized in Table 1.  
52  
53  
54  
55  
56

## 57 **Data analysis**

58  
59  
60

1  
2  
3 The questionnaires with missing values were excluded from data analysis, so that the  
4  
5 number of subjects studied was 17,467 for self-rated health; 17,358 for satisfaction with  
6  
7 life; 16,803 for health complaints; and 16,560 for health-related quality of life. The  
8  
9 sample excluding missing values was similar to the original, comparing the main  
10  
11 socioeconomic variables, health status, and the frequency of undertaking MVPA.  
12

13  
14 The complex sampling design was taken into account during analysis by using the  
15  
16 “Survey Data” module of the statistical package Stata v11. Standard errors were  
17  
18 computed by using the linearized variance estimator based on a first-order Taylor series.  
19  
20 Prevalence was calculated for optimal self-rated health, low level of health complaints,  
21  
22 high satisfaction with life, and the means for the scores on the scale for health-related  
23  
24 quality of life, with 95% confidence intervals, both global and for the categories of each  
25  
26 one of the exposure variables.  
27  
28

29  
30 Regression models were used, logistic ones for the estimation of the odds ratio of  
31  
32 prevalence (OR) and linear ones for the calculation of the regression coefficients,  
33  
34 adjusting for the potential confounding variables mentioned above. All co-variables were  
35  
36 added simultaneously into the models. First, we calculated the association between the  
37  
38 frequency of undertaking MVPA and health status by estimating OR for the following  
39  
40 categories: 1-2 days, 3-4 days, 5-6 days, and 7 days, using ‘never’ as the reference.  
41  
42 Second, linear and quadratic trends of the association between MVPA and the health  
43  
44 indicators were calculated from the regression models. For the linear trend, the average  
45  
46 value for each category was used modelling it as a continuous variable, while for the  
47  
48 quadratic trend the square of these values was used. Statistical significance was set at  
49  
50  $p < 0.05$ .  
51  
52  
53  
54

55 To further explore the relationships between MVPA and health status indicators without  
56  
57 imposing any particular functional form for the dose-response trends, the amount of  
58  
59  
60

1  
2  
3 moderate-to-vigorous physical activity was entered in regression models using restricted  
4 quadratic splines with knots at 1, 3.5, and 6 days/week.<sup>28</sup> Restricted quadratic splines  
5 allow for different quadratic trends within each intermediate category and linear trends in  
6 boundary categories, and hence they can accommodate a wide variety of smooth dose-  
7 response curves, while avoiding implausible shapes at the tails of the exposure  
8 distribution.

9  
10  
11  
12  
13  
14  
15  
16 Interactions between MVPA, age and sex were evaluated. Given that interactions were  
17 found in the relationship between the frequency of MVPA and health status according to  
18 sex, the results are shown separately for males and females.

## 25 26 **RESULTS**

27  
28  
29 Table 1 describes the health status of the questionnaire respondents, as estimated by the  
30 four health indicators. A total of 91.1% (CI 95%: 90.3-92.0) declared they had an  
31 optimal self-rated health, 67.4% (CI 95%: 66.1-68.5) had a low level of health  
32 complaints and 90.9% (CI 95%: 90.1-91.6) reported a high satisfaction with life. The  
33 mean score on the scale for health-related quality of life was 47.1 (CI 95%: 46.5- 47.6).

34  
35  
36  
37  
38  
39  
40 According to all the indicators used, the level of health was better, in a statistically  
41 significant way, for the questionnaire respondents who indicated that they undertook  
42 MVPA more frequently, with gradual increases depending on the categories of MVPA  
43 (Table 1). The rest of potentially confounding variables considered, were also associated  
44 with self-rated health, less health complaints, high satisfaction with life and health-  
45 related quality of life (Tables 1 and 2).

1  
2  
3 No statistically significant interactions were found between MVPA and age, whereas  
4  
5 statistical significance was reached between MVPA and sex for the indicators self-rated  
6  
7 health and satisfaction with life.  
8  
9

10 Tables 3 and 4 and Figure 1 show the results of the multivariate analysis that evaluated, for  
11  
12 each sex separately, the association of the frequency of undertaking MVPA with the  
13  
14 different indicators of health status, controlling the effect on this association of personal and  
15  
16 family factors. For both boys and girls, there was a positive, graded and statistically  
17  
18 significant association (linear trend,  $p < 0.001$ ) between MVPA and self-rated health (Table  
19  
20 3), with odds ratios (OR) that ranged in males from 2.37, for those who undertook MVPA  
21  
22 on 1-2 days, to 4.60 and 4.05, for those undertaking it on 5-6 and 7 days, respectively.  
23  
24 Moving from less than 5 days to 5-6 days of MVPA, the OR increased from 2.34 to 4.60. In  
25  
26 females, although a positive association was also found, the magnitude of the benefits on  
27  
28 self-reported health was lower, with values that were half those for the males (OR= 2.14, if  
29  
30 MPVA undertaken 7 days).  
31  
32  
33

34  
35 Regarding less health complaints (Table 3), an increase in the positive effects was seen in  
36  
37 males from small amounts of MVPA on 1-2 days (OR=1.66,  $p=0.008$ ), which increased  
38  
39 further to an OR of nearly 2 for MVPA on 5-6 days. In females, this effect was lower,  
40  
41 reaching statistical significance after MVPA on 5-6 days with an OR of 1.46 ( $p=0.009$ ). The  
42  
43 linear trend p-value was statistically significant ( $p < 0.001$ ) in both males and females.  
44  
45

46 The degree of satisfaction with life (Table 3) was also shown to be significantly associated  
47  
48 with the frequency of undertaking MVPA; among the boys the OR for high satisfaction  
49  
50 increased to 1.99 if physical activity was undertaken on 1-2 days per week, and satisfaction  
51  
52 remained at these values for frequencies of more than 5 days of MVPA. In girls, the  
53  
54 magnitude of the effect was similar, but the gradient was steeper. The linear trend p-value  
55  
56 was statistically significant for females ( $p < 0.001$ ), but not for males.  
57  
58  
59  
60

1  
2  
3 Table 4 shows the same analysis applied to health-related quality of life, considering it  
4 as a continuous variable and using linear regression to analyse it. In males, an increasing  
5 dose-response effect was seen, especially noticeable after 5-days per week of MVPA  
6 ( $\beta=3.03$ ), which increased even further, to 5.08, for those undertaking MVPA for 7-days  
7 per week. In females, the benefits were lower at low levels of frequency of MVPA, but  
8 reached the same magnitude from 5 days of MVPA. Overall, this indicator was the one  
9 that showed fewer differences between boys and girls, as can be seen in Figure 1. The  
10 quadratic trend p-value was statistically significant in males ( $p=0.006$ ) and females  
11 ( $p<0.001$ ).

## 22 23 24 25 26 **DISCUSSION**

### 27 28 **Principal findings**

29  
30 The results of this study clearly show the benefits of undertaking physical activity on the  
31 health status of adolescents enrolled in schools in Spain. The following results should be  
32 highlighted: 1) the magnitude of the effect, with benefits for optimal health reaching OR  
33 higher than 4 for males who undertook MVPA daily or on most days, as compared to  
34 those who never undertook it; 2) the existence of a dose-response effect, with the  
35 positive effects increasing in accordance with the increase in the frequency of MVPA; 3)  
36 the consistency of the results with the association present for the four health indicators in  
37 both sexes; and 4) the greater positive effect in males, especially at low levels of  
38 frequency of MVPA.

39  
40 Few studies have linked the effect of MPVA on general indicators of health status in  
41 adolescents. Using data from the HBSC study for adolescents from North America,  
42 Western Europe, Eastern Europe, Northern Europe and Southern Europe, Iannotti et al.<sup>29</sup>  
43  
44  
45  
46  
47  
48  
49  
50  
51  
52  
53  
54  
55  
56  
57  
58  
59  
60

1  
2  
3 evaluated the relationship between the frequency of PA and self-rated health, health  
4 complaints and satisfaction with life and found, as in our study, beneficial effects for all  
5 three indicators.  
6  
7  
8  
9

### 10 **Dose-response relationship**

11  
12 The dose-response relationship between PA and health implies that increases in PA are  
13 related with additional improvements in health status, even when it is not undertaken  
14 very frequently. This has also been found in other studies regarding dyslipidemia, blood  
15 pressure, overweight and obesity, metabolic syndrome and mental health.<sup>4,30-32</sup> However,  
16 to our knowledge, there are no comparable studies that measure the nature of the  
17 relationship on general indicators of health status. Indeed, there is a controversy about  
18 whether this relationship is linear or curvilinear, as some studies have found linear  
19 patterns, whereas others have not,<sup>4,30-32</sup> probably because the patterns can be different  
20 depending upon the health effect that is being assessed. In our study, a curvilinear  
21 relationship was found with a slight slowdown in the health benefits beyond 3-4 days of  
22 MVPA in the following indicators: self-rated health; health complaints; and satisfaction  
23 with life. In contrast, for health-related quality of life in both sexes, the benefits  
24 increased from these intermediate levels of MVPA. These differences in the dose-  
25 response relationship suggest that the effect varies depending upon the different  
26 dimensions of health status to which the indicators are related. Although self-rated  
27 health has been proposed as a measurement of the summary effect of multiple  
28 dimensions of health, it is more closely related to the physical dimension rather than the  
29 mental and social ones.<sup>33</sup> Similarly, the scale for health complaints is related to  
30 symptoms with psychosomatic components very frequently associated with  
31 adolescence.<sup>34</sup> Yet, the scale for the quality of life, besides including such physical and  
32 mental dimensions, also incorporates family and social relationships, which could  
33  
34  
35  
36  
37  
38  
39  
40  
41  
42  
43  
44  
45  
46  
47  
48  
49  
50  
51  
52  
53  
54  
55  
56  
57  
58  
59  
60



1  
2  
3 suggest that these additional dimensions may be involved in the achieving of greater  
4  
5 health benefits with the maximum frequencies of MVPA.  
6

7  
8 It should be stressed that the benefits to health status are obtained from low levels of  
9  
10 MVPA, especially for boys. Similar results have been reported for self-rated health in a  
11  
12 young adult population<sup>35</sup> and regarding blood pressure and dyslipidemia in  
13  
14 adolescents.<sup>31,32</sup> This could have important implications for the preventive  
15  
16 recommendations, because (although 60 minutes of physical activity is currently  
17  
18 recommended, if possible on a daily basis) the fact that positive results of a moderate  
19  
20 magnitude can be achieved with very small amounts of MVPA may encourage the  
21  
22 participation of the more sedentary people. Nevertheless, the maximum benefits were  
23  
24 obtained according to public health recommendations, so the message should be: “even a  
25  
26 little is good; more is better”.<sup>36</sup>  
27  
28  
29

### 30 **Gender differences**

31  
32  
33 The results in health that are derived from undertaking MVPA are greater in males,  
34  
35 especially in self-rated health and, to a lesser extent, in having less health complaints.  
36  
37 According to our study, females need to undertake more days of MVPA to obtain  
38  
39 similar health benefits. However, the effect on satisfaction with life and health-related  
40  
41 quality of life was fairly similar in males and females. These differences suggest that the  
42  
43 variation of the effect of MVPA according to sex could also be associated to different  
44  
45 dimensions of health status. Previous reviews have clearly shown important differences  
46  
47 between males and females in the quantity, intensity and type of physical activity, and  
48  
49 that, in part, these distinctions could be explained by biological differences and those  
50  
51 relating to sociocultural environment and body image.<sup>21,37</sup> It would, therefore, be  
52  
53 interesting for subsequent studies to undertake detailed research about this relationship.  
54  
55  
56  
57

### 58 **Strengths and weaknesses**

1  
2  
3 To aid correct interpretation of these data, several limitations should be mentioned. First,  
4  
5 the limitation in causal inference, stemming from the cross-sectional nature of the study,  
6  
7 would theoretically affect the temporality of the association. That is, people who have  
8  
9 health problems can have limitations in undertaking physical exercise. However, from  
10  
11 the data of the National Health Survey of 2006,<sup>38</sup> only 1.7% of adolescents between 16  
12  
13 and 19 years do not undertake the leisure time physical exercise that they would like to  
14  
15 take because of health problems, hence, this figure would not affect the results obtained.  
16  
17 Second, the measurement of health status, MVPA and several covariables of the study is  
18  
19 based on self-reported information. Although it is difficult to anticipate the magnitude  
20  
21 and direction of the bias induced by measurement error in self-reported physical activity  
22  
23 without validity or reproducibility substudies, some degree of attenuation in the  
24  
25 underlying trends would be expected if the misclassification of physical activity status  
26  
27 was nondifferential with respect to health outcomes. Nevertheless, the measurement of  
28  
29 health status using subjective health scales, as in this present study, has been validated in  
30  
31 previous studies,<sup>20,23,24,39,40</sup> and such scales are considered to be useful tools especially in  
32  
33 the stage of adolescence, when psychological aspects are so important in the feeling of  
34  
35 well-being among young people. The variable used for estimating MVPA has been  
36  
37 previously validated in an adolescent population of Spain, obtaining an acceptable level  
38  
39 of validity when compared with measurement using accelerometers.<sup>25</sup> Other variables,  
40  
41 such as self-reported BMI or tobacco consumption, have also been validated in Spain, by  
42  
43 comparing them with objective measurements.<sup>41,42</sup> Third, it has not been possible to  
44  
45 differentiate the effect of the intensity of physical activity, which is a dimension  
46  
47 independently related with self-rated health.<sup>35</sup>

48  
49 The main strengths of this study are the representativeness and large size of the sample  
50  
51 used, which means that the results can be extrapolated accurately, and that the  
52  
53  
54  
55  
56  
57  
58  
59  
60

1  
2  
3 methodology employed is the standard one for the HBSC study. This is a collaborative  
4  
5 WHO study in which more than 40 Western countries (including Spain) have  
6  
7 participated.  
8

## 9 10 **CONCLUSIONS**

11  
12 To sum up, an association was found between the frequency of undertaking self-reported  
13  
14 MVPA and the health status of adolescents enrolled in schools in Spain. A linear trend  
15  
16 was found for self-rated health, health complaints and for satisfaction with life. For  
17  
18 health-related quality of life the relationship was quadratic. The benefits of MVPA on  
19  
20 health were detected from very low levels, below those established by current  
21  
22 recommendations. In general, the magnitude of association was lower in females than in  
23  
24 males, a finding that needs to be explained by subsequent research.  
25  
26  
27  
28  
29  
30

31 **Acknowledgments:** We thank the teachers, principals and participants for their  
32  
33 generous contribution to this study.  
34  
35

36 **Contributors:** All authors were involved in the development of the design of the study.  
37  
38 PR, FR and CM coordinated the field work and collected the data. IG, RB, MM and RP  
39  
40 conducted the analyses. IG and RB prepared the first draft. All authors contributed to the  
41  
42 interpretation of data and revision of the manuscript. All authors approved the final  
43  
44 version.  
45  
46  
47

48 **Funding:** This study has been funded by the *Consejo Superior de Deportes* [National  
49  
50 Sports Council] and the *Ministerio de Sanidad, Servicios Sociales e Igualdad* [Ministry  
51  
52 of Health and Social Policy].  
53  
54

55 **Competing interests:** None.  
56  
57  
58  
59  
60

1  
2  
3 **Ethics approval:** This study was approved by the Institutional Review Board of the  
4  
5 Carlos III Institute of Health.  
6

7  
8 **Provenance and peer review:** Not commissioned; externally peer reviewed.  
9

10 **Data sharing statement:** Full results of the Spanish HBSC study are available at  
11  
12 <http://www.msps.es/profesionales/saludPublica/prevPromocion/promocion/saludJovenes>  
13  
14 [/estudioHBSC/nacional\\_hbsc.htm](http://www.msps.es/profesionales/saludPublica/prevPromocion/promocion/saludJovenes)  
15  
16  
17  
18  
19  
20  
21  
22  
23  
24  
25  
26  
27  
28  
29  
30  
31  
32  
33  
34  
35  
36  
37  
38  
39  
40  
41  
42  
43  
44  
45  
46  
47  
48  
49  
50  
51  
52  
53  
54  
55  
56  
57  
58  
59  
60

## REFERENCES

1. World Health Organization. Global Strategy on Diet, Physical Activity and Health.  
[http://www.who.int/dietphysicalactivity/strategy/eb11344/strategy\\_english\\_web.pdf](http://www.who.int/dietphysicalactivity/strategy/eb11344/strategy_english_web.pdf)  
(accessed Dec 2012).
2. Biddle SJ, Asare M. Physical activity and mental health in children and adolescents: a review of reviews. *Br J Sports Med* 2011, 45:886-95.
3. Hallal PC, Victora CG, Azevedo MR, *et al.* Adolescent physical activity and health: a systematic review. *Sports Med* 2006, 36:1019-30.
4. Janssen I, Leblanc AG. Systematic review of the health benefits of physical activity and fitness in school-aged children and youth. *Int J Behav Nutr Phys Act* 2010, 7:40.
5. Strong WB, Malina RM, Blimkie CJ, *et al.* Evidence based physical activity for school-age youth. *J Pediatr* 2005, 146:732-7.
6. Physical Activity Guidelines Advisory Committee report, 2008. To the Secretary of Health and Human Services. Part A: executive summary. *Nutr Rev* 2009, 67; 114-20.
7. Janssen I. Physical activity guidelines for children and youth. *Can J Public Health* 2007, 98 Suppl 2:109-21.
8. Fedewa A, Ahn S. The effects of physical activity and physical fitness on children's achievement and cognitive outcomes: a meta-analysis. *Res Q Exerc Sport* 2011, 82:521-35.
9. Abu-Omar K, Rutten A, Robine JM. Self-rated health and physical activity in the European Union. *Soz Praventivmed* 2004, 49:235-42.

10. Haennel RG, Lemire F. Physical activity to prevent cardiovascular disease. How much is enough? *Can Fam Physician* 2002, 48:65-71.
11. Kim K, Shin YJ, Nam JH, *et al*. A dose-response relationship between types of physical activity and distress. *J Korean Med Sci* 2008, 23:218-25.
12. Lee IM, Skerrett PJ. Physical activity and all-cause mortality: what is the dose-response relation? *Med Sci Sports Exerc* 2001, 33 Suppl 6:459-71.
13. Martin CK, Church TS, Thompson AM, *et al*. Exercise dose and quality of life: a randomized controlled trial. *Arch Intern Med* 2009, 169:269-78.
14. Mayer-Davis EJ, D'Agostino R, Jr., Karter AJ, *et al*. Intensity and amount of physical activity in relation to insulin sensitivity: the Insulin Resistance Atherosclerosis Study. *JAMA* 1998, 279:669-74.
15. Ohkawara K, Tanaka S, Miyachi M, *et al*. A dose-response relation between aerobic exercise and visceral fat reduction: systematic review of clinical trials. *Int J Obes (Lond)* 2007, 31:1786-97.
16. Lollgen H, Bockenhoff A, Knapp G. Physical activity and all-cause mortality: an updated meta-analysis with different intensity categories. *Int J Sports Med* 2009, 30:213-24.
17. Ekelund U, Luan J, Sherar LB, *et al*. Moderate to vigorous physical activity and sedentary time and cardiometabolic risk factors in children and adolescents. *JAMA* 2012, 307:704-12.
18. World Health Organization. Global recommendations on physical activity for health. World Health Organization 2010.  
[http://whqlibdoc.who.int/publications/2010/9789241599979\\_eng.pdf](http://whqlibdoc.who.int/publications/2010/9789241599979_eng.pdf) (accessed Feb 2013).

- 1  
2  
3  
4  
5  
6  
7  
8  
9  
10  
11  
12  
13  
14  
15  
16  
17  
18  
19  
20  
21  
22  
23  
24  
25  
26  
27  
28  
29  
30  
31  
32  
33  
34  
35  
36  
37  
38  
39  
40  
41  
42  
43  
44  
45  
46  
47  
48  
49  
50  
51  
52  
53  
54  
55  
56  
57  
58  
59  
60
19. Ravens-Sieberer U, Torsheim T, Hetland J, *et al.* Subjective health, symptom load and quality of life of children and adolescents in Europe. *Int J Public Health* 2009, 54 Suppl 2:151-9.
  20. Ravens-Sieberer U, Erhart M, Wille N, *et al.* Generic health-related quality-of-life assessment in children and adolescents: methodological considerations. *Pharmacoeconomics* 2006, 24:1199-220.
  21. Sallis JF, Prochaska JJ, Taylor WC. A review of correlates of physical activity of children and adolescents. *Med Sci Sports Exerc* 2000, 32:963-75.
  22. Currie C, Nic GS, Godeau E. The Health Behaviour in School-aged Children: WHO Collaborative Cross-National (HBSC) study: origins, concept, history and development 1982-2008. *Int J Public Health* 2009, 54 Suppl 2:131-9.
  23. Curries, CE, Gabhainn, SN, Godeau, E. Inequalities in young people Health. HBSC International report from the 2005/2006 Survey. WHO Regional Office for Europe, Copenhagen, Denmark.  
[http://www.euro.who.int/\\_data/assets/pdf\\_file/0005/53852/E91416.pdf](http://www.euro.who.int/_data/assets/pdf_file/0005/53852/E91416.pdf) (accessed Dec 2012).
  24. Erhart M, Ottova V, Gaspar T, *et al.* Measuring mental health and well-being of school-children in 15 European countries using the KIDSCREEN-10 Index. *Int J Public Health* 2009, 54 Suppl 2:160-6.
  25. Martinez-Gomez D, Martinez-De-Haro V, Del-Campo J, *et al.* [Validity of four questionnaires to assess physical activity in Spanish adolescents]. *Gac Sanit* 2009, 23:512-7.
  26. Cole TJ, Bellizzi MC, Flegal KM, *et al.* Establishing a standard definition for child overweight and obesity worldwide: international survey. *BMJ* 2000, 320:1240-3.

- 1  
2  
3 27. Currie C, Molcho M, Boyce W, *et al.* Researching health inequalities in adolescents: the  
4 development of the Health Behaviour in School-Aged Children (HBSC) family affluence  
5 scale. *Soc Sci Med* 2008, 66:1429-36.  
6  
7  
8  
9  
10 28. Greenland S. Dose-response and trend analysis in epidemiology: alternatives to  
11 categorical analysis. *Epidemiology* 1995, 6:356-65.  
12  
13  
14 29. Iannotti RJ, Janssen I, Haug E, *et al.* Interrelationships of adolescent physical activity,  
15 screen-based sedentary behaviour, and social and psychological health. *Int J Public*  
16 *Health* 2009, 54 Suppl 2:191-8.  
17  
18  
19  
20 30. Hamer M, Stamatakis E, Steptoe A. Dose-response relationship between physical activity  
21 and mental health: the Scottish Health Survey. *Br J Sports Med* 2009, 43:1111-4.  
22  
23  
24  
25 31. Leblanc AG, Janssen I. Dose-response relationship between physical activity and  
26 dyslipidemia in youth. *Can J Cardiol* 2010, 26:201-5.  
27  
28  
29  
30 32. Mark AE, Janssen I. Dose-response relation between physical activity and blood pressure  
31 in youth. *Med Sci Sports Exerc* 2008, 40:1007-12.  
32  
33  
34  
35 33. Mavaddat N, Kinmonth AL, Sanderson S, *et al.* What determines Self-Rated Health  
36 (SRH)? A cross-sectional study of SF-36 health domains in the EPIC-Norfolk cohort. *J*  
37 *Epidemiol Community Health* 2011, 65:800-6.  
38  
39  
40  
41 34. Ravens-Sieberer U, Erhart M, Torsheim T, *et al.* An international scoring system for self-  
42 reported health complaints in adolescents. *Eur J Public Health* 2008, 18:294-9.  
43  
44  
45  
46 35. Galan I, Meseguer CM, Herruzo R, *et al.* Self-rated health according to amount, intensity  
47 and duration of leisure time physical activity. *Prev Med* 2010, 51:378-83.  
48  
49  
50  
51 36. Lee IM. Dose-response relation between physical activity and fitness: even a little is  
52 good; more is better. *JAMA* 2007; 297, 2137-9.  
53  
54  
55  
56  
57  
58  
59  
60



- 1  
2  
3 37. Van Der HK, Paw MJ, Twisk JW, *et al.* A brief review on correlates of physical activity  
4 and sedentariness in youth. *Med Sci Sports Exerc* 2007, 39:1241-50.  
5  
6  
7  
8 38. Ministry of Health, Social Services and Equality, 2012. National Health Survey 2006.  
9  
10 <http://www.msps.es/estadEstudios/estadisticas/encuestaNacional/encuesta2006.htm>  
11  
12 (accessed Dec 2012).  
13  
14  
15 39. Boardman JD. Self-rated health among U.S. adolescents. *J Adolesc Health* 2006, 38:401-  
16  
17 8.  
18  
19  
20 40. Fosse NE, Haas SA. Validity and stability of self-reported health among adolescents in a  
21  
22 longitudinal, nationally representative survey. *Pediatrics* 2009, 123:e496-e501.  
23  
24  
25 41. Galán I, Gandarillas A, Febrel C, *et al.* [Validation of self-reported weight and height in  
26  
27 an adolescent population]. *Gac Sanit* 2001, 15:490-7.  
28  
29  
30 42. Galán I, Meseguer CM, León CM, *et al.* Validity of adolescent self-reported smoking  
31  
32 [Validez de la medición del consumo de tabaco autodeclarado en población juvenil]. *Gac*  
33  
34 *Sanit* 2000, 14 Suppl 2: 85.  
35  
36  
37  
38  
39  
40  
41  
42  
43  
44  
45  
46  
47  
48  
49  
50  
51  
52  
53  
54  
55  
56  
57  
58  
59  
60

Table 1. Description of the sample and distribution of optimal self-rated health, less health complaints, high satisfaction with life and health-related quality of life, according to individual variables. Spanish adolescents aged 11–18 years, 2006.

|                                     |                       | Optimal Self-reported health<br>N (17467) | Less health complaints<br>N (16803) | High satisfaction with life<br>N (17358) | Health-related quality of life<br>N (16560) |
|-------------------------------------|-----------------------|-------------------------------------------|-------------------------------------|------------------------------------------|---------------------------------------------|
|                                     |                       | %                                         | %                                   | %                                        | Mean                                        |
| MVPA                                | Global                | 91.1                                      | 67.4                                | 90.9                                     | 47.1                                        |
|                                     | Never                 | 80.1*                                     | 54.1*                               | 82.3*                                    | 42.6*                                       |
|                                     | 1-2 days              | 87.5                                      | 62.8                                | 87.4                                     | 44.3                                        |
|                                     | 3-4 days              | 90.8                                      | 66.3                                | 91.3                                     | 46.2                                        |
|                                     | 5-6 days              | 94.8                                      | 72.8                                | 93.1                                     | 48.2                                        |
| Sex                                 | 7 days                | 95.9                                      | 74.1                                | 95.2                                     | 52.5                                        |
|                                     | Men                   | 93.3*                                     | 76.7*                               | 91.9*                                    | 48.3*                                       |
| Age                                 | Women                 | 89.3                                      | 59.5                                | 90.0                                     | 46.1                                        |
|                                     | 10-12                 | 95.8*                                     | 68.6                                | 94.9*                                    | 52.5*                                       |
|                                     | 13-16                 | 90.1                                      | 67.6                                | 89.8                                     | 45.6                                        |
| Born in Spain                       | 17-18                 | 86.8                                      | 65.1                                | 87.7                                     | 43.2                                        |
|                                     | Yes                   | 91.1                                      | 67.7*                               | 91.2*                                    | 47.2                                        |
|                                     | No                    | 91.2                                      | 62.9                                | 85.3                                     | 45.7                                        |
| Smoking                             | Non-smoker            | 94.5*                                     | 70.6*                               | 94.0*                                    | 49.3*                                       |
|                                     | Smoker                | 80.9                                      | 56.6                                | 83.7                                     | 42.8                                        |
|                                     | Ex-smoker             | 89.2                                      | 66.6                                | 86.9                                     | 44.1                                        |
| Consumption of alcohol              | Never                 | 95.4*                                     | 70.4*                               | 94.3*                                    | 50.7*                                       |
|                                     | Rarely                | 89.9                                      | 65.2                                | 88.9                                     | 45.4                                        |
|                                     | Monthly               | 88.1                                      | 66.3                                | 87.2                                     | 43.5                                        |
|                                     | Weekly or daily       | 85.2                                      | 64.2                                | 87.9                                     | 43.9                                        |
| Body-mass index                     | Normal or underweight | 92.5*                                     | 68.2*                               | 91.5*                                    | 47.0                                        |
|                                     | Overweight            | 86.7                                      | 67.6                                | 90.3                                     | 47.1                                        |
|                                     | Obese                 | 77.4                                      | 58.0                                | 83.0                                     | 46.6                                        |
|                                     | NR                    | 90.4                                      | 64.6                                | 89.4                                     | 47.2                                        |
| Consumption of fruit and vegetables | Quartile 1            | 88.2*                                     | 64.1*                               | 88.8*                                    | 45.8*                                       |
|                                     | Quartile 2            | 91.5                                      | 67.5                                | 91.5                                     | 46.5                                        |
|                                     | Quartile 3            | 92.5                                      | 69.7                                | 92.2                                     | 47.2                                        |
|                                     | Quartile 4            | 92.6                                      | 68.5                                | 91.2                                     | 48.7                                        |
| Breakfast during the week           | Every day             | 93.2*                                     | 70.4*                               | 92.6*                                    | 48.1*                                       |
|                                     | Not every day         | 85.5                                      | 59.1                                | 86.1                                     | 44.3                                        |
| Time spent TV and computers         | Quartile 1            | 91.1                                      | 68.7*                               | 91.5*                                    | 48.0*                                       |
|                                     | Quartile 2            | 91.1                                      | 69.4                                | 91.8                                     | 47.0                                        |
|                                     | Quartile 3            | 91.7                                      | 68.8                                | 91.5                                     | 47.0                                        |
|                                     | Quartile 4            | 90.2                                      | 62.8                                | 88.7                                     | 46.2                                        |
|                                     | NR                    | 92.6                                      | 65.4                                | 89.3                                     | 48.6                                        |
| Time spent studying/ homework       | Quartile 1            | 89.3*                                     | 68.8*                               | 87.1*                                    | 46.3*                                       |
|                                     | Quartile 2            | 92.2                                      | 69.3                                | 91.9                                     | 47.9                                        |
|                                     | Quartile 3            | 92.4                                      | 68.8                                | 92.5                                     | 47.7                                        |
|                                     | Quartile 4            | 90.5                                      | 62.9                                | 91.5                                     | 46.3                                        |
|                                     | NR                    | 89.4                                      | 69.3                                | 88.6                                     | 48.4                                        |
| Academic achievement                | Very good             | 96.3*                                     | 71.8*                               | 96.4*                                    | 52.4*                                       |
|                                     | Good                  | 94.0                                      | 69.7                                | 94.2                                     | 48.2                                        |
|                                     | Average               | 87.4                                      | 65.3                                | 87.3                                     | 44.2                                        |
|                                     | Low                   | 79.7                                      | 54.0                                | 75.3                                     | 41.7                                        |

\*  $p < 0.05$

MVPA: Moderate-to-Vigorous Physical Activity

NR: Non-response

Table 2. Description of the sample and distribution of optimal self-rated health, less health complaints, high satisfaction with life and health-related quality of life, according to family variables. Spanish adolescents aged 11–18 years, 2006.

|                                                       | Optimal Self-reported health<br>N (17467) | Less health complaints<br>N (16803) | High satisfaction with life<br>N (17358) | Health-related quality of life<br>N (16560) |
|-------------------------------------------------------|-------------------------------------------|-------------------------------------|------------------------------------------|---------------------------------------------|
|                                                       | %                                         | %                                   | %                                        | Mean                                        |
| Employment situation of father                        |                                           |                                     |                                          |                                             |
| Paid employment                                       | 91.5*                                     | 67.8*                               | 91.3*                                    | 47.2*                                       |
| No paid employment                                    | 86.9                                      | 63.0                                | 85.4                                     | 45.4                                        |
| Don't know                                            | 90.3                                      | 52.9                                | 91.5                                     | 43.3                                        |
| No father                                             | 85.4                                      | 59.8                                | 82.0                                     | 44.3                                        |
| Employment situation of mother                        |                                           |                                     |                                          |                                             |
| Paid employment                                       | 91.0                                      | 67.1                                | 90.8*                                    | 47.1*                                       |
| No paid employment                                    | 91.5                                      | 68.3                                | 91.4                                     | 47.0                                        |
| Don't know                                            | 90.9                                      | 59.1                                | 91.4                                     | 47.5                                        |
| No mother                                             | 83.7                                      | 58.7                                | 78.0                                     | 45.2                                        |
| Socioeconomic status                                  |                                           |                                     |                                          |                                             |
| Low                                                   | 86.2*                                     | 62.6*                               | 84.5*                                    | 45.2*                                       |
| Average                                               | 91.2                                      | 66.7                                | 90.9                                     | 46.9                                        |
| High                                                  | 92.9                                      | 69.9                                | 93.2                                     | 48.0                                        |
| Country of birth of father                            |                                           |                                     |                                          |                                             |
| Spain                                                 | 91.1                                      | 67.6                                | 91.2*                                    | 47.1                                        |
| Other countries                                       | 91.1                                      | 64.7                                | 86.2                                     | 46.4                                        |
| Country of birth of mother                            |                                           |                                     |                                          |                                             |
| Spain                                                 | 91.1                                      | 67.7*                               | 91.1*                                    | 47.1                                        |
| Other countries                                       | 91.9                                      | 62.4                                | 87.3                                     | 46.1                                        |
| Type of household                                     |                                           |                                     |                                          |                                             |
| Both parents                                          | 92.0*                                     | 68.4*                               | 91.9*                                    | 47.3*                                       |
| Single parent                                         | 86.9                                      | 62.2                                | 85.0                                     | 45.7                                        |
| Blended                                               | 83.0                                      | 59.3                                | 82.6                                     | 44.2                                        |
| Others                                                | 85.3                                      | 61.3                                | 86.8                                     | 46.8                                        |
| Number of adults in the household                     |                                           |                                     |                                          |                                             |
| 2                                                     | 91.7*                                     | 64.1*                               | 91.2*                                    | 47.3                                        |
| 0,1,3,4,5                                             | 88.8                                      | 68.3                                | 89.3                                     | 46.4                                        |
| Number of minors in the household                     |                                           |                                     |                                          |                                             |
| 1,2,3                                                 | 91.1                                      | 60.3*                               | 91.0                                     | 47.1                                        |
| >3                                                    | 90.6                                      | 68.0                                | 88.8                                     | 46.8                                        |
| Satisfaction: family relationships <sup>a</sup>       |                                           |                                     |                                          |                                             |
| Good                                                  | 93.0*                                     | 45.2*                               | 94.2*                                    | 48.0*                                       |
| Fair-bad                                              | 75.9                                      | 70.1                                | 64.2                                     | 39.4                                        |
| Satisfaction: relationships with friends <sup>a</sup> |                                           |                                     |                                          |                                             |
| Good                                                  | 92.0*                                     | 48.5*                               | 92.3*                                    | 47.5*                                       |
| Fair-bad                                              | 77.1                                      | 68.6                                | 68.5                                     | 40.0                                        |

\*  $p < 0.05$

<sup>a</sup> Good: score 7-10; Fair-bad: score 0-6

Table 3. Logistic models. Association between the amount of moderate-to-vigorous physical activity and optimal self-rated health, less health complaints and high satisfaction with life. Spanish adolescents aged 11–18 years, 2006.

|                                    | Men                 |        | Women               |        |  |
|------------------------------------|---------------------|--------|---------------------|--------|--|
|                                    | OR* (95% CI)        | P      | OR* (95% CI)        | P      |  |
| <b>Optimal self-rated health</b>   |                     |        |                     |        |  |
| Frequency of undertaking MVPA      |                     |        |                     |        |  |
| Never                              | 1 (ref)             |        | 1 (ref)             |        |  |
| 1-2 days                           | 2.37 (1.56 to 3.58) | <0.001 | 1.20 (0.85 to 1.69) | 0.282  |  |
| 3-4 days                           | 2.34 (1.44 to 3.81) | 0.001  | 1.51 (1.06 to 2.14) | 0.020  |  |
| 5-6 days                           | 4.60 (2.60 to 8.13) | <0.001 | 2.28 (1.47 to 3.52) | <0.001 |  |
| 7 days                             | 4.05 (2.38 to 6.89) | <0.001 | 2.14 (1.37 to 3.34) | 0.001  |  |
| Linear trend P-value               | <0.001              |        | <0.001              |        |  |
| Quadratic trend P-value            | 0.325               |        | 0.850               |        |  |
| <b>Less health complaints</b>      |                     |        |                     |        |  |
| Frequency of undertaking MVPA      |                     |        |                     |        |  |
| Never                              | 1 (ref)             |        | 1 (ref)             |        |  |
| 1-2 days                           | 1.66 (1.14 to 2.42) | 0.008  | 1.16 (0.90 to 1.49) | 0.226  |  |
| 3-4 days                           | 1.65 (1.14 to 2.39) | 0.007  | 1.21 (0.93 to 1.58) | 0.143  |  |
| 5-6 days                           | 2.09 (1.47 to 2.96) | <0.001 | 1.46 (1.10 to 1.93) | 0.009  |  |
| 7 days                             | 1.94 (1.38 to 2.73) | <0.001 | 1.32 (0.97 to 1.80) | 0.076  |  |
| Linear trend P-value               | 0.001               |        | 0.021               |        |  |
| Quadratic trend P-value            | 0.216               |        | 0.463               |        |  |
| <b>High satisfaction with life</b> |                     |        |                     |        |  |
| Frequency of undertaking MVPA      |                     |        |                     |        |  |
| Never                              | 1 (ref)             |        | 1 (ref)             |        |  |
| 1-2 days                           | 1.99 (1.20 to 3.31) | 0.007  | 0.93 (0.63 to 1.36) | 0.722  |  |
| 3-4 days                           | 1.52 (0.90 to 2.55) | 0.111  | 1.44 (0.99 to 2.10) | 0.056  |  |
| 5-6 days                           | 2.02 (1.17 to 3.49) | 0.011  | 1.56 (0.98 to 2.49) | 0.059  |  |
| 7 days                             | 1.94 (1.09 to 3.44) | 0.023  | 2.00 (1.19 to 3.35) | 0.008  |  |
| Linear trend P-value               | 0.128               |        | <0.001              |        |  |
| Quadratic trend P-value            | 0.661               |        | 0.975               |        |  |

\* Adjusted for age, country of birth, smoking, alcohol consumption, BMI, consumption of fruit and vegetables, daily breakfast, time spent watching TV using computers, time spent studying, academic achievement, employment situation of the father and mother, socioeconomic status, country of birth of the father and mother, type of household, number of adults and number of minors in the household, satisfaction with family relationships and with friends.

Table 4. Linear models. Association between the amount of moderate-to-vigorous physical activity and health-related quality of life. Spanish adolescents aged 11–18 years, 2006.

|                               | Men                 |        | Women                 |        |
|-------------------------------|---------------------|--------|-----------------------|--------|
|                               | $\beta$ * (95% CI)  | P      | $\beta$ * (95% CI)    | P      |
| Frequency of undertaking MVPA |                     |        |                       |        |
| Never                         | 0 (ref)             |        | 0 (ref)               |        |
| 1-2 days                      | 1.61 (0.29 to 2.93) | 0.017  | 0.19 (- 0.71 to 1.10) | 0.676  |
| 3-4 days                      | 1.87 (0.50 to 3.24) | 0.007  | 1.19 (0.37 to 2.02)   | 0.005  |
| 5-6 days                      | 3.03 (1.74 to 4.31) | <0.001 | 2.79 (1.76 to 3.82)   | <0.001 |
| 7 days                        | 5.08 (3.73 to 6.43) | <0.001 | 5.09 (3.86 to 6.32)   | <0.001 |
| Linear trend P-value          | <0.001              |        | <0.001                |        |
| Quadratic trend P-value       | 0.006               |        | <0.001                |        |

\* Adjusted for age, country of birth, smoking, alcohol consumption, BMI, consumption of fruit and vegetables, daily breakfast, time spent watching TV and using computers, time spent studying, academic achievement, employment situation of the father and mother, socioeconomic status, country of birth of the father and mother, type of household, number of adults and number of minors in the household, satisfaction with family relationships and with friends.

1  
2  
3 Figure 1. Dose-response relationship of the amount of self-reported Moderate-to-  
4 Vigorous Physical Activity (MVPA) with optimal self-rated health, less health  
5 complaints, high satisfaction with life, and health-related quality of life among Spanish  
6 adolescents aged 11–18 years.  
7  
8  
9

10  
11 *Footnote:*

12 Curves represent adjusted odds ratios or mean differences (solid lines) and their 95%  
13 confidence intervals (dashed lines) based on restricted quadratic splines for the amount  
14 of MVPA with knots at 1, 3.5, and 6 days/week. The reference value (odds ratio = 1 and  
15 mean difference = 0) was set at 0 days/week of moderate-vigorous physical activity.  
16 Odds ratios and mean differences were obtained from logistic and linear regression  
17 models accounting for the complex survey and adjusted for personal and familial risk  
18 factors (see Methods). Bars represent the weighted bar charts of the amount of MVPA  
19 among men and women.  
20  
21  
22  
23  
24  
25  
26  
27  
28  
29  
30  
31  
32  
33  
34  
35  
36  
37  
38  
39  
40  
41  
42  
43  
44  
45  
46  
47  
48  
49  
50  
51  
52  
53  
54  
55  
56  
57  
58  
59  
60

1  
2  
3 **Physical activity and self-reported health status among adolescents: a cross-sectional**  
4 **population-based study**  
5  
6

7 **Galán I,<sup>1,2</sup> Boix R,<sup>1</sup> Medrano MJ,<sup>1</sup> Ramos P,<sup>3</sup> Rivera F,<sup>4</sup> Pastor-Barriuso R,<sup>1,5</sup> Moreno C<sup>3</sup>**  
8  
9

10  
11  
12 <sup>1</sup> *Centro Nacional de Epidemiología. Instituto de Salud Carlos III* [National Centre of  
13 Epidemiology, Carlos III Institute of Health], Madrid (Spain)  
14

15  
16 <sup>2</sup> *Departamento de Medicina Preventiva y Salud Pública. Facultad de Medicina.*  
17 *Universidad Autónoma de Madrid* [Department of Preventive Medicine and Public  
18 Health, Faculty of Medicine, Autonomous University of Madrid], Madrid (Spain)  
19

20  
21 <sup>3</sup> *Departamento de Psicología Evolutiva y de la Educación. Facultad de Psicología.*  
22 *Universidad de Sevilla* [Department of Developmental and Educational Psychology,  
23 Faculty of Psychology, University of Seville], Seville (Spain)  
24  
25

26  
27 <sup>4</sup> *Departamento de Psicología Clínica, Experimental y Social. Universidad de Huelva*  
28 [Department of Clinical, Experimental and Social Psychology, University of Huelva],  
29 Huelva (Spain)  
30  
31

32  
33 <sup>5</sup> Consortium for Biomedical Research in Epidemiology and Public Health  
34 (CIBERESP), Spain  
35  
36

37  
38  
39  
40  
41 **Keywords:** Physical activity, health status, adolescents  
42

43  
44 **Word count:**  
45  
46

47  
48  
49 **Corresponding author:**

50 Iñaki Galán

51 Centro Nacional de Epidemiología, Madrid (Spain)

52 c/ Monforte de Lemos 5. CP: 28029

53 Telephone: +34 918222679

54 Fax: +34 913877815

55 e-mail: [igalan@isciii.es](mailto:igalan@isciii.es)  
56  
57  
58  
59  
60

## Abstract

**Objectives:** Little is known about the dose-response relationship between physical activity and health benefits among young people. Our objective was to analyse the association between the frequency of undertaking Moderate-to-Vigorous Physical Activity (MVPA) and the self-reported health status of the adolescent population.

**Design:** Cross-sectional study.

**Setting:** All regions of Spain.

**Participants:** Students aged 11-18 years participating in the Spanish Health Behaviour in School-aged Children (HBSC) survey 2006. A total of 375 schools and 21,188 students were selected.

**Main outcomes:** The frequency of undertaking MVPA was measured by questionnaire, as were the following four health indicators: self-rated health, health complaints, satisfaction with life, and health-related quality of life. Linear and logistic regression models were used to analyse the association, adjusting for potential confounding variables and the modelling of the dose-response relationship.

**Results:** As the frequency of MVPA increased, the association with health benefits was stronger. A linear trend ( $p < 0.05$ ) was found for self-rated health and health complaints in males and females, and for satisfaction with life among females; for health-related quality of life, this relationship was quadratic for both sexes ( $p < 0.05$ ). For self-reported health and health complaints, the effect was found to be of greater magnitude in males than in females and, in all scales, the benefits were observed from the lowest frequencies of MVPA, especially in males.

**Conclusions:** A protective effect of MVPA was found in both sexes for the four health indicators studied, and this activity had a gradient effect. Among males, health benefits



1  
2  
3 were detected from very low levels of physical activity and the magnitude of the  
4  
5 relationship was greater than that for females.  
6  
7  
8  
9  
10  
11  
12  
13  
14  
15  
16  
17  
18  
19  
20  
21  
22  
23  
24  
25  
26  
27  
28  
29  
30  
31  
32  
33  
34  
35  
36  
37  
38  
39  
40  
41  
42  
43  
44  
45  
46  
47  
48  
49  
50  
51  
52  
53  
54  
55  
56  
57  
58  
59  
60

For peer review only

## Article summary

### Article focus

- Although it is recommended that all adolescents should undertake 60 minutes of daily Moderate-to-Vigorous Physical Activity (MVPA), little is known about the nature of the relationship in this population, and whether or not the effect varies depending on age and sex.
- We examined cross-sectional associations between the frequency of undertaking self-reported MVPA and the health status of the adolescent population, using subjective health scales that are considered to be useful tools especially in the stage of adolescence, when psychological aspects are so important in the feeling of well-being among young people.

### Key messages

- The protective effect of MVPA on health was detected from very low levels, below those established by current recommendations.
- A linear trend was found for self-rated health, health complaints and for satisfaction with life. For health-related quality of life the relationship was quadratic.
- The positive effect on health produced lower results in females than in males.

### Strengths and limitations of this study

- The main strength is the representativeness and large size of the sample. The methodology employed is the standard one for the HBSC study in which more than 40 Western countries have participated.
- A major limitation is the cross-sectional nature of the study. Moreover, the measurement of health status using subjective health scales and the estimation of MVPA are both based on self-reported information.

## INTRODUCTION

According to the World Health Organization (WHO)<sup>1</sup>, physical inactivity is the fourth most important risk factor affecting global mortality, to which nearly 6% of all deaths are attributed. In the adolescent population, short-term benefits related to Physical Activity (PA) are improvements in lipid profile, blood pressure, metabolic syndrome, muscular strength and bone density, together with a reduction in obesity and overweight levels, as well as a decrease in emotional problems and depressive symptoms.<sup>2-5</sup> Moreover, young people who undertake PA adopt healthy behaviour more easily and have better levels of academic achievement and cognitive functioning.<sup>4, 6-8</sup>

The dose-response relationship between physical activity and various health indicators has mainly been studied in the adult population,<sup>9-15</sup> where there is still a controversy about whether or not this relationship is linear.<sup>12,16</sup> Ekelund et al.,<sup>17</sup> in a pooled data analysis of 14 studies in children and adolescents, found a direct benefit between three tertiles of Moderate-to-Vigorous Physical Activity (MVPA) in relation to cardiometabolic outcomes. Although the WHO recommends that all children of 5-17 years of age take at least 60 minutes of daily MVPA,<sup>18</sup> little is known about the nature of the relationship in this population. Therefore, finding out the effect on health of several levels of PA could have important implications for improving the recommendations regarding this activity.

It should be emphasized that concepts underlying health status in children and adolescents differ from those for adults. As young people are still developing, the measurement of health status must be approached from a global and comprehensive perspective for each individual. Concepts such as 'subjective health' and 'health-related quality of life' cover complex physical, emotional, mental and social aspects.<sup>19,20</sup> Hence,

1  
2  
3 it is important to evaluate if the effect of the PA is distributed in a distinct way for the  
4  
5 different dimensions of health status.  
6

7  
8 Finally, although PA varies considerably depending on age and sex,<sup>21</sup> to our knowledge  
9  
10 there have been very few studies in the literature about the role that these variables play  
11  
12 regarding the effect of PA on health.<sup>4</sup>  
13

14  
15 The objective of this study was to analyse the association between the frequency of  
16  
17 undertaking MVPA and the different dimensions of adolescent health status, assessing if  
18  
19 this relationship differs according to age and sex.  
20  
21

## 22 23 24 25 **METHODS**

### 26 27 **Study population**

28  
29  
30 The source of information was the Health Behaviour in School-aged Children (HBSC)  
31  
32 study carried out in 2006.<sup>22</sup> The population was a representative sample of  
33  
34 preadolescents and adolescents, with an age range of 11-18 years, resident in Spain and  
35  
36 enrolled in school from the 5th year of primary school to the last year of upper  
37  
38 secondary school (2nd year of baccalaureate). A multistage stratified random sampling  
39  
40 was used, taking into account age strata (4 groups), region (17 autonomous  
41  
42 communities), school site (rural and urban), and type of school (public and private).  
43  
44 Initially, 480 schools were contacted of which 377 (103 private and 274 public schools)  
45  
46 agreed to participate in the study, which represented a response rate of 78.5%. **On**  
47  
48 **average, three classes were selected in each school.** A total of 22,350 questionnaires  
49  
50 were collected, although subsequently 539 were excluded because of non-response to  
51  
52 questions about sex and age, or lack of response to more than 50% of the questionnaire.  
53  
54  
55  
56  
57 The sample size was 21,811 participants. The study was carried out in spring 2006.  
58  
59  
60

1  
2  
3 Previously trained survey technicians visited the selected schools, where the students  
4  
5 completed an anonymous questionnaire during normal school hours.  
6  
7

8 This study was approved by the Institutional Review Board of the Carlos III Institute of  
9  
10 Health .  
11

### 12 Study variables

13  
14 Health status was measured using four indicators: 1) self-rated health was measured using  
15 the question “*Would you say that your health is: excellent, good, fair or bad*”. Optimal  
16 health status was categorized by a response of excellent or good, and sub-optimal health  
17 status was categorized by a response of fair or bad. 2) The health complaints indicator  
18 was assessed using a scale based on the HBSC-Symptom Checklist, which is a list of  
19 eight physical and psychological symptoms (headaches, abdominal pain, backache,  
20 feeling low, irritability, nervousness, sleeping difficulties and dizziness), to estimate their  
21 frequency during the last six months. Having 2 or more symptoms with a frequency of  
22 several times a week or daily was considered to define having noticeable subjective  
23 health complaints.<sup>19</sup> 3) Satisfaction with life was estimated using the Cantril Ladder,<sup>23</sup> in  
24 which, using a scale from 0 to 10, the participant was asked “*on which rung of the ladder*  
25 *(scale from 0 to 10) do you feel you stand at this moment in your life?*”, with 0 being the  
26 worst score and 10 the best. A score of 0 to 5 was categorized as dissatisfied, whereas a  
27 score of 6 to 10 was categorized as satisfied.<sup>19</sup> 4) Health-related quality of life was  
28 measured using the Kidscreen-10 index,<sup>24</sup> a series of 10 questions about mood, ability to  
29 concentrate, energy, vitality, well-being, ability to have fun with friends. Each question  
30 has five categories of response ranging from “never” to “always” or from “not at all” to  
31 “extremely often”. The items fulfil the assumptions of the Rasch model. To make the  
32 interpretation more applicable, the scores of the Rasch scales are translated into T-values  
33  
34  
35  
36  
37  
38  
39  
40  
41  
42  
43  
44  
45  
46  
47  
48  
49  
50  
51  
52  
53  
54  
55  
56  
57  
58  
59  
60

1  
2  
3 with scale means of 50 and standard deviation of 10, with higher values indicating higher  
4  
5 health-related quality of life.<sup>24</sup>  
6

7  
8 The frequency of MVPA was measured using the question: “*in the last seven days,*  
9  
10 *considering moderate and vigorous activity... On how many days did you feel you were*  
11 *physically active for a total of 60 minutes per day?*” The response categories were from 0  
12 to 7 days. This question, when compared with PA assessed by accelerometers in Spanish  
13 adolescents, has shown an acceptable validation.<sup>25</sup>  
14  
15  
16  
17  
18

19  
20 The following factors were considered as potentially confounding variables for the  
21 association between health status and frequency of MVPA: 1) personal variables (sex,  
22 age, country of birth, current smoker, alcohol consumption, body-mass index –calculated  
23 as the ratio of weight in kg/height in m<sup>2</sup> from self-reported weight and height, and  
24 defining overweight and obesity using the cut-off points proposed by Cole et al.,<sup>26</sup>  
25 consumption of fruit and vegetables, daily breakfast, number of hours each day spent  
26 watching television and using computers or game consoles, number of hours each day  
27 spent doing school homework); 2) family variables (employment status of the father,  
28 employment status of the mother, family purchasing power –measured by the Family  
29 Affluence Scale,<sup>27</sup> an index estimated by four items: number of times that the adolescents  
30 have been on holiday with their family in the last 12 months; does the family own a car or  
31 van; does the student have his/her own bedroom; number of computers owned by the  
32 family-, country of birth of the father, country of birth of the mother, type of household –  
33 both parents, single parent, blended family–, number of minors in the household, number  
34 of adults in the household); and 3) relationships with the school, the family and friends  
35 (academic achievement, satisfaction with family relationships, satisfaction with  
36 relationships with friends). The variables are categorized in Table 1.  
37  
38  
39  
40  
41  
42  
43  
44  
45  
46  
47  
48  
49  
50  
51  
52  
53  
54  
55  
56

### 57 **Data analysis**

58  
59  
60

1  
2  
3 The questionnaires with missing values were excluded from data analysis, so that the  
4  
5 number of subjects studied was 17,467 for self-rated health; 17,358 for satisfaction with  
6  
7 life; 16,803 for health complaints; and 16,560 for health-related quality of life. The  
8  
9 sample excluding missing values was similar to the original, comparing the main  
10  
11 socioeconomic variables, health status, and the frequency of undertaking MVPA.  
12

13  
14 The complex sampling design was taken into account during analysis by using the  
15  
16 “Survey Data” module of the statistical package Stata v11. Standard errors were  
17  
18 computed by using the linearized variance estimator based on a first-order Taylor series.  
19  
20 Prevalence was calculated for optimal self-rated health, low level of health complaints,  
21  
22 high satisfaction with life, and the means for the scores on the scale for health-related  
23  
24 quality of life, with 95% confidence intervals, both global and for the categories of each  
25  
26 one of the exposure variables.  
27  
28

29  
30 Regression models were used, logistic ones for the estimation of the odds ratio of  
31  
32 prevalence (OR) and linear ones for the calculation of the regression coefficients,  
33  
34 adjusting for the potential confounding variables mentioned above. All co-variables were  
35  
36 added simultaneously into the models. First, we calculated the association between the  
37  
38 frequency of undertaking MVPA and health status by estimating OR for the following  
39  
40 categories: 1-2 days, 3-4 days, 5-6 days, and 7 days, using ‘never’ as the reference.  
41  
42 Second, linear and quadratic trends of the association between MVPA and the health  
43  
44 indicators were calculated from the regression models. For the linear trend, the average  
45  
46 value for each category was used modelling it as a continuous variable, while for the  
47  
48 quadratic trend the square of these values was used. Statistical significance was set at  
49  
50  $p < 0.05$ .  
51  
52  
53  
54

55 To further explore the relationships between MVPA and health status indicators without  
56  
57 imposing any particular functional form for the dose-response trends, the amount of  
58  
59  
60

1  
2  
3 moderate-to-vigorous physical activity was entered in regression models using restricted  
4 quadratic splines with knots at 1, 3.5, and 6 days/week.<sup>28</sup> Restricted quadratic splines  
5 allow for different quadratic trends within each intermediate category and linear trends in  
6 boundary categories, and hence they can accommodate a wide variety of smooth dose-  
7 response curves, while avoiding implausible shapes at the tails of the exposure  
8 distribution.

9  
10  
11  
12  
13  
14  
15  
16 Interactions between MVPA, age and sex were evaluated. Given that interactions were  
17 found in the relationship between the frequency of MVPA and health status according to  
18 sex, the results are shown separately for males and females.

## 25 26 RESULTS

27  
28  
29 Table 1 describes the health status of the questionnaire respondents, as estimated by the  
30 four health indicators. A total of 91.1% (CI 95%: 90.3-92.0) declared they had an  
31 optimal self-rated health, 67.4% (CI 95%: 66.1-68.5) had a low level of health  
32 complaints and 90.9% (CI 95%: 90.1-91.6) reported a high satisfaction with life. The  
33 mean score on the scale for health-related quality of life was 47.1 (CI 95%: 46.5- 47.6).

34  
35  
36  
37  
38  
39  
40 According to all the indicators used, the level of health was better, in a statistically  
41 significant way, for the questionnaire respondents who indicated that they undertook  
42 MVPA more frequently, with gradual increases depending on the categories of MVPA  
43 (Table 1). **The rest of potentially confounding variables considered, were also associated**  
44 **with self-rated health, less health complaints, high satisfaction with life and health-**  
45 **related quality of life (Tables 1 and 2).**



1  
2  
3 No statistically significant interactions were found between MVPA and age, whereas  
4  
5 statistical significance was reached between MVPA and sex for the indicators self-rated  
6  
7 health and satisfaction with life.  
8  
9

10 Tables 3 and 4 and Figure 1 show the results of the multivariate analysis that evaluated, for  
11  
12 each sex separately, the association of the frequency of undertaking MVPA with the  
13  
14 different indicators of health status, controlling the effect on this association of personal and  
15  
16 family factors. For both boys and girls, there was a positive, graded and statistically  
17  
18 significant association (linear trend,  $p < 0.001$ ) between MVPA and self-rated health (Table  
19  
20 3), with odds ratios (OR) that ranged in males from 2.37, for those who undertook MVPA  
21  
22 on 1-2 days, to 4.60 and 4.05, for those undertaking it on 5-6 and 7 days, respectively.  
23  
24 Moving from less than 5 days to 5-6 days of MVPA, the OR increased from 2.34 to 4.60. In  
25  
26 females, although a positive association was also found, the magnitude of the benefits on  
27  
28 self-reported health was lower, with values that were half those for the males (OR= 2.14, if  
29  
30 MPVA undertaken 7 days).  
31  
32  
33

34  
35 Regarding less health complaints (Table 3), an increase in the positive effects was seen in  
36  
37 males from small amounts of MVPA on 1-2 days (OR=1.66,  $p=0.008$ ), which increased  
38  
39 further to an OR of nearly 2 for MVPA on 5-6 days. In females, this effect was lower,  
40  
41 reaching statistical significance after MVPA on 5-6 days with an OR of 1.46 ( $p=0.009$ ). The  
42  
43 linear trend p-value was statistically significant ( $p < 0.001$ ) in both males and females.  
44  
45

46 The degree of satisfaction with life (Table 3) was also shown to be significantly associated  
47  
48 with the frequency of undertaking MVPA; among the boys the OR for high satisfaction  
49  
50 increased to 1.99 if physical activity was undertaken on 1-2 days per week, and satisfaction  
51  
52 remained at these values for frequencies of more than 5 days of MVPA. In girls, the  
53  
54 magnitude of the effect was similar, but the gradient was steeper. The linear trend p-value  
55  
56 was statistically significant for females ( $p < 0.001$ ), but not for males.  
57  
58  
59  
60

1  
2  
3 Table 4 shows the same analysis applied to health-related quality of life, considering it  
4 as a continuous variable and using linear regression to analyse it. In males, an increasing  
5 dose-response effect was seen, especially noticeable after 5-days per week of MVPA  
6 ( $\beta=3.03$ ), which increased even further, to 5.08, for those undertaking MVPA for 7-days  
7 per week. In females, the benefits were lower at low levels of frequency of MVPA, but  
8 reached the same magnitude from 5 days of MVPA. Overall, this indicator was the one  
9 that showed fewer differences between boys and girls, as can be seen in Figure 1. The  
10 quadratic trend p-value was statistically significant in males ( $p=0.006$ ) and females  
11 ( $p<0.001$ ).

## 22 23 24 25 26 **DISCUSSION**

### 27 28 **Principal findings**

29  
30 The results of this study clearly show the benefits of undertaking physical activity on the  
31 health status of adolescents enrolled in schools in Spain. The following results should be  
32 highlighted: 1) the magnitude of the effect, with benefits for optimal health reaching OR  
33 higher than 4 for males who undertook MVPA daily or on most days, as compared to  
34 those who never undertook it; 2) the existence of a dose-response effect, with the  
35 positive effects increasing in accordance with the increase in the frequency of MVPA; 3)  
36 the consistency of the results with the association present for the four health indicators in  
37 both sexes; and 4) the greater positive effect in males, especially at low levels of  
38 frequency of MVPA.

39  
40 Few studies have linked the effect of MPVA on general indicators of health status in  
41 adolescents. Using data from the HBSC study for adolescents from North America,  
42 Western Europe, Eastern Europe, Northern Europe and Southern Europe, Iannotti et al.<sup>29</sup>  
43  
44  
45  
46  
47  
48  
49  
50  
51  
52  
53  
54  
55  
56  
57  
58  
59  
60

1  
2  
3 evaluated the relationship between the frequency of PA and self-rated health, health  
4 complaints and satisfaction with life and found, as in our study, beneficial effects for all  
5 three indicators.  
6  
7  
8

### 9 10 **Dose-response relationship**

11  
12 The dose-response relationship between PA and health implies that increases in PA are  
13 related with additional improvements in health status, even when it is not undertaken  
14 very frequently. This has also been found in other studies regarding dyslipidemia, blood  
15 pressure, overweight and obesity, metabolic syndrome and mental health.<sup>4,30-32</sup> However,  
16 to our knowledge, there are no comparable studies that measure the nature of the  
17 relationship on general indicators of health status. Indeed, there is a controversy about  
18 whether this relationship is linear or curvilinear, as some studies have found linear  
19 patterns, whereas others have not,<sup>4,30-32</sup> probably because the patterns can be different  
20 depending upon the health effect that is being assessed. In our study, a curvilinear  
21 relationship was found with a slight slowdown in the health benefits beyond 3-4 days of  
22 MVPA in the following indicators: self-rated health; health complaints; and satisfaction  
23 with life. In contrast, for health-related quality of life in both sexes, the benefits  
24 increased from these intermediate levels of MVPA. These differences in the dose-  
25 response relationship suggest that the effect varies depending upon the different  
26 dimensions of health status to which the indicators are related. Although self-rated  
27 health has been proposed as a measurement of the summary effect of multiple  
28 dimensions of health, it is more closely related to the physical dimension rather than the  
29 mental and social ones.<sup>33</sup> Similarly, the scale for health complaints is related to  
30 symptoms with psychosomatic components very frequently associated with  
31 adolescence.<sup>34</sup> Yet, the scale for the quality of life, besides including such physical and  
32 mental dimensions, also incorporates family and social relationships, which could  
33  
34  
35  
36  
37  
38  
39  
40  
41  
42  
43  
44  
45  
46  
47  
48  
49  
50  
51  
52  
53  
54  
55  
56  
57  
58  
59  
60

1  
2  
3 suggest that these additional dimensions may be involved in the achieving of greater  
4  
5 health benefits with the maximum frequencies of MVPA.  
6

7  
8 It should be stressed that the benefits to health status are obtained from low levels of  
9  
10 **MVPA**, especially for boys. Similar results have been reported for self-rated health in a  
11  
12 young adult population<sup>35</sup> and regarding blood pressure and dyslipidemia in  
13  
14 adolescents.<sup>31,32</sup> This could have important implications for the preventive  
15  
16 recommendations, because (although 60 minutes of physical activity is currently  
17  
18 recommended, if possible on a daily basis) the fact that positive results of a moderate  
19  
20 magnitude can be achieved with very small amounts of MVPA **may** encourage the  
21  
22 participation of the more sedentary people. Nevertheless, the maximum benefits were  
23  
24 obtained according to public health recommendations, so the message should be: “even a  
25  
26 little is good; more is better”.<sup>36</sup>  
27  
28  
29

### 30 **Gender differences**

31  
32  
33 The results in health that are derived from undertaking MVPA are greater in males,  
34  
35 especially in self-rated health and, to a lesser extent, in having less health complaints.  
36  
37 According to our study, females need to undertake more days of MVPA to obtain  
38  
39 similar health benefits. However, the effect on satisfaction with life and health-related  
40  
41 quality of life was fairly similar in males and females. These differences suggest that the  
42  
43 variation of the effect of MVPA according to sex could also be associated to different  
44  
45 dimensions of health status. Previous reviews have clearly shown important differences  
46  
47 between males and females in the quantity, intensity and type of physical activity, and  
48  
49 that, in part, these distinctions could be explained by biological differences and those  
50  
51 relating to sociocultural environment and body image.<sup>21,37</sup> It would, therefore, be  
52  
53 interesting for subsequent studies to undertake detailed research about this relationship.  
54  
55  
56  
57

### 58 **Strengths and weaknesses**

1  
2  
3 To aid correct interpretation of these data, several limitations should be mentioned. First,  
4 the limitation in causal inference, stemming from the cross-sectional nature of the study,  
5 would theoretically affect the temporality of the association. That is, people who have  
6 health problems can have limitations in undertaking physical exercise. However, from  
7 the data of the National Health Survey of 2006,<sup>38</sup> only 1.7% of adolescents between 16  
8 and 19 years do not undertake the leisure time physical exercise that they would like to  
9 take because of health problems, hence, this figure would not affect the results obtained.

10  
11  
12  
13  
14  
15  
16  
17  
18  
19  
20  
21  
22  
23  
24  
25  
26  
27  
28  
29  
30  
31  
32  
33  
34  
35  
36  
37  
38  
39  
40  
41  
42  
43  
44  
45  
46  
47  
48  
49  
50  
51  
52  
53  
54  
55  
56  
57  
58  
59  
60

Second, the measurement of health status, MVPA and several covariables of the study is based on self-reported information. Although it is difficult to anticipate the magnitude and direction of the bias induced by measurement error in self-reported physical activity without validity or reproducibility substudies, some degree of attenuation in the underlying trends would be expected if the misclassification of physical activity status was nondifferential with respect to health outcomes. Nevertheless, the measurement of health status using subjective health scales, as in this present study, has been validated in previous studies,<sup>20,23,24,39,40</sup> and such scales are considered to be useful tools especially in the stage of adolescence, when psychological aspects are so important in the feeling of well-being among young people. The variable used for estimating MVPA has been previously validated in an adolescent population of Spain, obtaining an acceptable level of validity when compared with measurement using accelerometers.<sup>25</sup> Other variables, such as self-reported BMI or tobacco consumption, have also been validated in Spain, by comparing them with objective measurements.<sup>41,42</sup> Third, it has not been possible to differentiate the effect of the intensity of physical activity, which is a dimension independently related with self-rated health.<sup>35</sup>

The main strengths of this study are the representativeness and large size of the sample used, which means that the results can be extrapolated accurately, and that the

1  
2  
3 methodology employed is the standard one for the HBSC study. This is a collaborative  
4  
5 WHO study in which more than 40 Western countries (including Spain) have  
6  
7 participated.  
8

## 9 10 **CONCLUSIONS**

11  
12 To sum up, an association was found between the frequency of undertaking **self-reported**  
13  
14 MVPA and the health status of adolescents enrolled in schools in Spain. A linear trend  
15  
16 was found for self-rated health, health complaints and for satisfaction with life. For  
17  
18 health-related quality of life the relationship was quadratic. The benefits of MVPA on  
19  
20 health **were** detected from very low levels, below those established by current  
21  
22 recommendations. In general, **the magnitude of association was lower** in females than in  
23  
24 males, a finding that needs to be explained by subsequent research.  
25  
26  
27  
28  
29  
30

31 **Acknowledgments:** We thank the teachers, principals and participants for their  
32  
33 generous contribution to this study.  
34  
35

36 **Contributors:** All authors were involved in the development of the design of the study.  
37  
38 PR, FR and CM coordinated the field work and collected the data. IG, RB, MM and RP  
39  
40 conducted the analyses. IG and RB prepared the first draft. All authors contributed to the  
41  
42 interpretation of data and revision of the manuscript. All authors approved the final  
43  
44 version.  
45  
46  
47

48 **Funding:** This study has been funded by the *Consejo Superior de Deportes* [National  
49  
50 Sports Council] and the *Ministerio de Sanidad, Servicios Sociales e Igualdad* [Ministry  
51  
52 of Health and Social Policy].  
53  
54

55 **Competing interests:** None.  
56  
57  
58  
59  
60

1  
2  
3 **Ethics approval:** This study was approved by the Institutional Review Board of the  
4  
5 Carlos III Institute of Health.  
6

7  
8 **Provenance and peer review:** Not commissioned; externally peer reviewed.  
9

10 **Data sharing statement:** Full results of the Spanish HBSC study are available at  
11  
12 <http://www.msps.es/profesionales/saludPublica/prevPromocion/promocion/saludJovenes>  
13  
14 [/estudioHBSC/nacional\\_hbsc.htm](http://www.msps.es/profesionales/saludPublica/prevPromocion/promocion/saludJovenes)  
15  
16  
17  
18  
19  
20  
21  
22  
23  
24  
25  
26  
27  
28  
29  
30  
31  
32  
33  
34  
35  
36  
37  
38  
39  
40  
41  
42  
43  
44  
45  
46  
47  
48  
49  
50  
51  
52  
53  
54  
55  
56  
57  
58  
59  
60

## REFERENCES

1. World Health Organization. Global Strategy on Diet, Physical Activity and Health.  
[http://www.who.int/dietphysicalactivity/strategy/eb11344/strategy\\_english\\_web.pdf](http://www.who.int/dietphysicalactivity/strategy/eb11344/strategy_english_web.pdf)  
(accessed Dec 2012).
2. Biddle SJ, Asare M. Physical activity and mental health in children and adolescents: a review of reviews. *Br J Sports Med* 2011, 45:886-95.
3. Hallal PC, Victora CG, Azevedo MR, *et al.* Adolescent physical activity and health: a systematic review. *Sports Med* 2006, 36:1019-30.
4. Janssen I, Leblanc AG. Systematic review of the health benefits of physical activity and fitness in school-aged children and youth. *Int J Behav Nutr Phys Act* 2010, 7:40.
5. Strong WB, Malina RM, Blimkie CJ, *et al.* Evidence based physical activity for school-age youth. *J Pediatr* 2005, 146:732-7.
6. Physical Activity Guidelines Advisory Committee report, 2008. To the Secretary of Health and Human Services. Part A: executive summary. *Nutr Rev* 2009, 67; 114-20.
7. Janssen I. Physical activity guidelines for children and youth. *Can J Public Health* 2007, 98 Suppl 2:109-21.
8. Fedewa A, Ahn S. The effects of physical activity and physical fitness on children's achievement and cognitive outcomes: a meta-analysis. *Res Q Exerc Sport* 2011, 82:521-35.
9. Abu-Omar K, Rutten A, Robine JM. Self-rated health and physical activity in the European Union. *Soz Praventivmed* 2004, 49:235-42.



- 1  
2  
3 10. Haennel RG, Lemire F. Physical activity to prevent cardiovascular disease. How much is  
4  
5 enough? *Can Fam Physician* 2002, 48:65-71.  
6  
7  
8 11. Kim K, Shin YJ, Nam JH, *et al*. A dose-response relationship between types of physical  
9  
10 activity and distress. *J Korean Med Sci* 2008, 23:218-25.  
11  
12  
13 12. Lee IM, Skerrett PJ. Physical activity and all-cause mortality: what is the dose-response  
14  
15 relation? *Med Sci Sports Exerc* 2001, 33 Suppl 6:459-71.  
16  
17  
18 13. Martin CK, Church TS, Thompson AM, *et al*. Exercise dose and quality of life: a  
19  
20 randomized controlled trial. *Arch Intern Med* 2009, 169:269-78.  
21  
22  
23 14. Mayer-Davis EJ, D'Agostino R, Jr., Karter AJ, *et al*. Intensity and amount of physical  
24  
25 activity in relation to insulin sensitivity: the Insulin Resistance Atherosclerosis Study.  
26  
27 *JAMA* 1998, 279:669-74.  
28  
29  
30 15. Ohkawara K, Tanaka S, Miyachi M, *et al*. A dose-response relation between aerobic  
31  
32 exercise and visceral fat reduction: systematic review of clinical trials. *Int J Obes (Lond)*  
33  
34 2007, 31:1786-97.  
35  
36  
37 16. Lollgen H, Bockenhoff A, Knapp G. Physical activity and all-cause mortality: an updated  
38  
39 meta-analysis with different intensity categories. *Int J Sports Med* 2009, 30:213-24.  
40  
41  
42 17. Ekelund U, Luan J, Sherar LB, *et al*. Moderate to vigorous physical activity and sedentary  
43  
44 time and cardiometabolic risk factors in children and adolescents. *JAMA* 2012, 307:704-  
45  
46 12.  
47  
48  
49 18. World Health Organization. Global recommendations on physical activity for health.  
50  
51 World Health Organization 2010.  
52  
53 [http://whqlibdoc.who.int/publications/2010/9789241599979\\_eng.pdf](http://whqlibdoc.who.int/publications/2010/9789241599979_eng.pdf) (accessed Feb  
54  
55 2013).  
56  
57  
58  
59  
60

- 1  
2  
3 19. Ravens-Sieberer U, Torsheim T, Hetland J, *et al.* Subjective health, symptom load and  
4 quality of life of children and adolescents in Europe. *Int J Public Health* 2009, 54 Suppl  
5 2:151-9.  
6  
7  
8  
9  
10 20. Ravens-Sieberer U, Erhart M, Wille N, *et al.* Generic health-related quality-of-life  
11 assessment in children and adolescents: methodological considerations.  
12 *Pharmacoeconomics* 2006, 24:1199-220.  
13  
14  
15  
16  
17 21. Sallis JF, Prochaska JJ, Taylor WC. A review of correlates of physical activity of children  
18 and adolescents. *Med Sci Sports Exerc* 2000, 32:963-75.  
19  
20  
21  
22 22. Currie C, Nic GS, Godeau E. The Health Behaviour in School-aged Children: WHO  
23 Collaborative Cross-National (HBSC) study: origins, concept, history and development  
24 1982-2008. *Int J Public Health* 2009, 54 Suppl 2:131-9.  
25  
26  
27  
28  
29 23. Curries, CE, Gabhainn, SN, Godeau, E. Inequalities in young people Health. HBSC  
30 International report from the 2005/2006 Survey. WHO Regional Office for Europe,  
31 Copenhagen, Denmark.  
32  
33  
34  
35  
36 [http://www.euro.who.int/\\_data/assets/pdf\\_file/0005/53852/E91416.pdf](http://www.euro.who.int/_data/assets/pdf_file/0005/53852/E91416.pdf) (accessed Dec  
37 2012).  
38  
39  
40  
41 24. Erhart M, Ottova V, Gaspar T, *et al.* Measuring mental health and well-being of school-  
42 children in 15 European countries using the KIDSCREEN-10 Index. *Int J Public Health*  
43 2009, 54 Suppl 2:160-6.  
44  
45  
46  
47  
48 25. Martinez-Gomez D, Martinez-De-Haro V, Del-Campo J, *et al.* [Validity of four  
49 questionnaires to assess physical activity in Spanish adolescents]. *Gac Sanit* 2009,  
50 23:512-7.  
51  
52  
53  
54  
55 26. Cole TJ, Bellizzi MC, Flegal KM, *et al.* Establishing a standard definition for child  
56 overweight and obesity worldwide: international survey. *BMJ* 2000, 320:1240-3.  
57  
58  
59  
60

- 1  
2  
3 27. Currie C, Molcho M, Boyce W, *et al.* Researching health inequalities in adolescents: the  
4 development of the Health Behaviour in School-Aged Children (HBSC) family affluence  
5 scale. *Soc Sci Med* 2008, 66:1429-36.  
6  
7  
8  
9  
10 28. Greenland S. Dose-response and trend analysis in epidemiology: alternatives to  
11 categorical analysis. *Epidemiology* 1995, 6:356-65.  
12  
13  
14 29. Iannotti RJ, Janssen I, Haug E, *et al.* Interrelationships of adolescent physical activity,  
15 screen-based sedentary behaviour, and social and psychological health. *Int J Public*  
16 *Health* 2009, 54 Suppl 2:191-8.  
17  
18  
19  
20 30. Hamer M, Stamatakis E, Steptoe A. Dose-response relationship between physical activity  
21 and mental health: the Scottish Health Survey. *Br J Sports Med* 2009, 43:1111-4.  
22  
23  
24 31. Leblanc AG, Janssen I. Dose-response relationship between physical activity and  
25 dyslipidemia in youth. *Can J Cardiol* 2010, 26:201-5.  
26  
27  
28 32. Mark AE, Janssen I. Dose-response relation between physical activity and blood pressure  
29 in youth. *Med Sci Sports Exerc* 2008, 40:1007-12.  
30  
31  
32 33. Mavaddat N, Kinmonth AL, Sanderson S, *et al.* What determines Self-Rated Health  
33 (SRH)? A cross-sectional study of SF-36 health domains in the EPIC-Norfolk cohort. *J*  
34 *Epidemiol Community Health* 2011, 65:800-6.  
35  
36  
37 34. Ravens-Sieberer U, Erhart M, Torsheim T, *et al.* An international scoring system for self-  
38 reported health complaints in adolescents. *Eur J Public Health* 2008, 18:294-9.  
39  
40  
41 35. Galan I, Meseguer CM, Herruzo R, *et al.* Self-rated health according to amount, intensity  
42 and duration of leisure time physical activity. *Prev Med* 2010, 51:378-83.  
43  
44  
45 36. Lee IM. Dose-response relation between physical activity and fitness: even a little is  
46 good; more is better. *JAMA* 2007; 297, 2137-9.  
47  
48  
49  
50  
51  
52  
53  
54  
55  
56  
57  
58  
59  
60

- 1  
2  
3 37. Van Der HK, Paw MJ, Twisk JW, *et al.* A brief review on correlates of physical activity  
4 and sedentariness in youth. *Med Sci Sports Exerc* 2007, 39:1241-50.  
5  
6  
7  
8 38. Ministry of Health, Social Services and Equality, 2012. National Health Survey 2006.  
9  
10 <http://www.msps.es/estadEstudios/estadisticas/encuestaNacional/encuesta2006.htm>  
11  
12 (accessed Dec 2012).  
13  
14  
15 39. Boardman JD. Self-rated health among U.S. adolescents. *J Adolesc Health* 2006, 38:401-  
16  
17 8.  
18  
19  
20 40. Fosse NE, Haas SA. Validity and stability of self-reported health among adolescents in a  
21  
22 longitudinal, nationally representative survey. *Pediatrics* 2009, 123:e496-e501.  
23  
24  
25 41. Galán I, Gandarillas A, Febrel C, *et al.* [Validation of self-reported weight and height in  
26  
27 an adolescent population]. *Gac Sanit* 2001, 15:490-7.  
28  
29  
30 42. Galán I, Meseguer CM, León CM, *et al.* Validity of adolescent self-reported smoking  
31  
32 [Validez de la medición del consumo de tabaco autodeclarado en población juvenil]. *Gac*  
33  
34 *Sanit* 2000, 14 Suppl 2: 85.  
35  
36  
37  
38  
39  
40  
41  
42  
43  
44  
45  
46  
47  
48  
49  
50  
51  
52  
53  
54  
55  
56  
57  
58  
59  
60

Table 1. Description of the sample and distribution of optimal self-rated health, less health complaints, high satisfaction with life and health-related quality of life, according to individual variables. Spanish adolescents aged 11–18 years, 2006.

|                                     |                       | Optimal Self-reported health<br>N (17467) | Less health complaints<br>N (16803) | High satisfaction with life<br>N (17358) | Health-related quality of life<br>N (16560) |
|-------------------------------------|-----------------------|-------------------------------------------|-------------------------------------|------------------------------------------|---------------------------------------------|
|                                     |                       | %                                         | %                                   | %                                        | Mean                                        |
| MVPA                                | Global                | 91.1                                      | 67.4                                | 90.9                                     | 47.1                                        |
|                                     | Never                 | 80.1*                                     | 54.1*                               | 82.3*                                    | 42.6*                                       |
|                                     | 1-2 days              | 87.5                                      | 62.8                                | 87.4                                     | 44.3                                        |
|                                     | 3-4 days              | 90.8                                      | 66.3                                | 91.3                                     | 46.2                                        |
|                                     | 5-6 days              | 94.8                                      | 72.8                                | 93.1                                     | 48.2                                        |
| Sex                                 | 7 days                | 95.9                                      | 74.1                                | 95.2                                     | 52.5                                        |
|                                     | Men                   | 93.3*                                     | 76.7*                               | 91.9*                                    | 48.3*                                       |
| Age                                 | Women                 | 89.3                                      | 59.5                                | 90.0                                     | 46.1                                        |
|                                     | 10-12                 | 95.8*                                     | 68.6                                | 94.9*                                    | 52.5*                                       |
|                                     | 13-16                 | 90.1                                      | 67.6                                | 89.8                                     | 45.6                                        |
| Born in Spain                       | 17-18                 | 86.8                                      | 65.1                                | 87.7                                     | 43.2                                        |
|                                     | Yes                   | 91.1                                      | 67.7*                               | 91.2*                                    | 47.2                                        |
|                                     | No                    | 91.2                                      | 62.9                                | 85.3                                     | 45.7                                        |
| Smoking                             | Non-smoker            | 94.5*                                     | 70.6*                               | 94.0*                                    | 49.3*                                       |
|                                     | Smoker                | 80.9                                      | 56.6                                | 83.7                                     | 42.8                                        |
|                                     | Ex-smoker             | 89.2                                      | 66.6                                | 86.9                                     | 44.1                                        |
| Consumption of alcohol              | Never                 | 95.4*                                     | 70.4*                               | 94.3*                                    | 50.7*                                       |
|                                     | Rarely                | 89.9                                      | 65.2                                | 88.9                                     | 45.4                                        |
|                                     | Monthly               | 88.1                                      | 66.3                                | 87.2                                     | 43.5                                        |
|                                     | Weekly or daily       | 85.2                                      | 64.2                                | 87.9                                     | 43.9                                        |
| Body-mass index                     | Normal or underweight | 92.5*                                     | 68.2*                               | 91.5*                                    | 47.0                                        |
|                                     | Overweight            | 86.7                                      | 67.6                                | 90.3                                     | 47.1                                        |
|                                     | Obese                 | 77.4                                      | 58.0                                | 83.0                                     | 46.6                                        |
|                                     | NR                    | 90.4                                      | 64.6                                | 89.4                                     | 47.2                                        |
| Consumption of fruit and vegetables | Quartile 1            | 88.2*                                     | 64.1*                               | 88.8*                                    | 45.8*                                       |
|                                     | Quartile 2            | 91.5                                      | 67.5                                | 91.5                                     | 46.5                                        |
|                                     | Quartile 3            | 92.5                                      | 69.7                                | 92.2                                     | 47.2                                        |
|                                     | Quartile 4            | 92.6                                      | 68.5                                | 91.2                                     | 48.7                                        |
| Breakfast during the week           | Every day             | 93.2*                                     | 70.4*                               | 92.6*                                    | 48.1*                                       |
|                                     | Not every day         | 85.5                                      | 59.1                                | 86.1                                     | 44.3                                        |
| Time spent TV and computers         | Quartile 1            | 91.1                                      | 68.7*                               | 91.5*                                    | 48.0*                                       |
|                                     | Quartile 2            | 91.1                                      | 69.4                                | 91.8                                     | 47.0                                        |
|                                     | Quartile 3            | 91.7                                      | 68.8                                | 91.5                                     | 47.0                                        |
|                                     | Quartile 4            | 90.2                                      | 62.8                                | 88.7                                     | 46.2                                        |
|                                     | NR                    | 92.6                                      | 65.4                                | 89.3                                     | 48.6                                        |
| Time spent studying/ homework       | Quartile 1            | 89.3*                                     | 68.8*                               | 87.1*                                    | 46.3*                                       |
|                                     | Quartile 2            | 92.2                                      | 69.3                                | 91.9                                     | 47.9                                        |
|                                     | Quartile 3            | 92.4                                      | 68.8                                | 92.5                                     | 47.7                                        |
|                                     | Quartile 4            | 90.5                                      | 62.9                                | 91.5                                     | 46.3                                        |
|                                     | NR                    | 89.4                                      | 69.3                                | 88.6                                     | 48.4                                        |
| Academic achievement                | Very good             | 96.3*                                     | 71.8*                               | 96.4*                                    | 52.4*                                       |
|                                     | Good                  | 94.0                                      | 69.7                                | 94.2                                     | 48.2                                        |
|                                     | Average               | 87.4                                      | 65.3                                | 87.3                                     | 44.2                                        |
|                                     | Low                   | 79.7                                      | 54.0                                | 75.3                                     | 41.7                                        |

\* p<0.05

MVPA: Moderate-to-Vigorous Physical Activity

NR: Non-response

Table 2. Description of the sample and distribution of optimal self-rated health, less health complaints, high satisfaction with life and health-related quality of life, according to family variables. Spanish adolescents aged 11–18 years, 2006.

|                                                       | Optimal Self-reported health<br>N (17467) | Less health complaints<br>N (16803) | High satisfaction with life<br>N (17358) | Health-related quality of life<br>N (16560) |
|-------------------------------------------------------|-------------------------------------------|-------------------------------------|------------------------------------------|---------------------------------------------|
|                                                       | %                                         | %                                   | %                                        | Mean                                        |
| Employment situation of father                        |                                           |                                     |                                          |                                             |
| Paid employment                                       | 91.5*                                     | 67.8*                               | 91.3*                                    | 47.2*                                       |
| No paid employment                                    | 86.9                                      | 63.0                                | 85.4                                     | 45.4                                        |
| Don't know                                            | 90.3                                      | 52.9                                | 91.5                                     | 43.3                                        |
| No father                                             | 85.4                                      | 59.8                                | 82.0                                     | 44.3                                        |
| Employment situation of mother                        |                                           |                                     |                                          |                                             |
| Paid employment                                       | 91.0                                      | 67.1                                | 90.8*                                    | 47.1*                                       |
| No paid employment                                    | 91.5                                      | 68.3                                | 91.4                                     | 47.0                                        |
| Don't know                                            | 90.9                                      | 59.1                                | 91.4                                     | 47.5                                        |
| No mother                                             | 83.7                                      | 58.7                                | 78.0                                     | 45.2                                        |
| Socioeconomic status                                  |                                           |                                     |                                          |                                             |
| Low                                                   | 86.2*                                     | 62.6*                               | 84.5*                                    | 45.2*                                       |
| Average                                               | 91.2                                      | 66.7                                | 90.9                                     | 46.9                                        |
| High                                                  | 92.9                                      | 69.9                                | 93.2                                     | 48.0                                        |
| Country of birth of father                            |                                           |                                     |                                          |                                             |
| Spain                                                 | 91.1                                      | 67.6                                | 91.2*                                    | 47.1                                        |
| Other countries                                       | 91.1                                      | 64.7                                | 86.2                                     | 46.4                                        |
| Country of birth of mother                            |                                           |                                     |                                          |                                             |
| Spain                                                 | 91.1                                      | 67.7*                               | 91.1*                                    | 47.1                                        |
| Other countries                                       | 91.9                                      | 62.4                                | 87.3                                     | 46.1                                        |
| Type of household                                     |                                           |                                     |                                          |                                             |
| Both parents                                          | 92.0*                                     | 68.4*                               | 91.9*                                    | 47.3*                                       |
| Single parent                                         | 86.9                                      | 62.2                                | 85.0                                     | 45.7                                        |
| Blended                                               | 83.0                                      | 59.3                                | 82.6                                     | 44.2                                        |
| Others                                                | 85.3                                      | 61.3                                | 86.8                                     | 46.8                                        |
| Number of adults in the household                     |                                           |                                     |                                          |                                             |
| 2                                                     | 91.7*                                     | 64.1*                               | 91.2*                                    | 47.3                                        |
| 0,1,3,4,5                                             | 88.8                                      | 68.3                                | 89.3                                     | 46.4                                        |
| Number of minors in the household                     |                                           |                                     |                                          |                                             |
| 1,2,3                                                 | 91.1                                      | 60.3*                               | 91.0                                     | 47.1                                        |
| >3                                                    | 90.6                                      | 68.0                                | 88.8                                     | 46.8                                        |
| Satisfaction: family relationships <sup>a</sup>       |                                           |                                     |                                          |                                             |
| Good                                                  | 93.0*                                     | 45.2*                               | 94.2*                                    | 48.0*                                       |
| Fair-bad                                              | 75.9                                      | 70.1                                | 64.2                                     | 39.4                                        |
| Satisfaction: relationships with friends <sup>a</sup> |                                           |                                     |                                          |                                             |
| Good                                                  | 92.0*                                     | 48.5*                               | 92.3*                                    | 47.5*                                       |
| Fair-bad                                              | 77.1                                      | 68.6                                | 68.5                                     | 40.0                                        |

\*  $p < 0.05$

<sup>a</sup> Good: score 7-10; Fair-bad: score 0-6

Table 3. Logistic models. Association between the amount of moderate-to-vigorous physical activity and optimal self-rated health, less health complaints and high satisfaction with life. Spanish adolescents aged 11–18 years, 2006.

|                                    | Men                 |        | Women               |   |        |
|------------------------------------|---------------------|--------|---------------------|---|--------|
|                                    | OR* (95% CI)        | P      | OR* (95% CI)        | P |        |
| <b>Optimal self-rated health</b>   |                     |        |                     |   |        |
| Frequency of undertaking MVPA      |                     |        |                     |   |        |
| Never                              | 1 (ref)             |        | 1 (ref)             |   |        |
| 1-2 days                           | 2.37 (1.56 to 3.58) | <0.001 | 1.20 (0.85 to 1.69) |   | 0.282  |
| 3-4 days                           | 2.34 (1.44 to 3.81) | 0.001  | 1.51 (1.06 to 2.14) |   | 0.020  |
| 5-6 days                           | 4.60 (2.60 to 8.13) | <0.001 | 2.28 (1.47 to 3.52) |   | <0.001 |
| 7 days                             | 4.05 (2.38 to 6.89) | <0.001 | 2.14 (1.37 to 3.34) |   | 0.001  |
| Linear trend P-value               | <0.001              |        | <0.001              |   |        |
| Quadratic trend P-value            | 0.325               |        | 0.850               |   |        |
| <b>Less health complaints</b>      |                     |        |                     |   |        |
| Frequency of undertaking MVPA      |                     |        |                     |   |        |
| Never                              | 1 (ref)             |        | 1 (ref)             |   |        |
| 1-2 days                           | 1.66 (1.14 to 2.42) | 0.008  | 1.16 (0.90 to 1.49) |   | 0.226  |
| 3-4 days                           | 1.65 (1.14 to 2.39) | 0.007  | 1.21 (0.93 to 1.58) |   | 0.143  |
| 5-6 days                           | 2.09 (1.47 to 2.96) | <0.001 | 1.46 (1.10 to 1.93) |   | 0.009  |
| 7 days                             | 1.94 (1.38 to 2.73) | <0.001 | 1.32 (0.97 to 1.80) |   | 0.076  |
| Linear trend P-value               | 0.001               |        | 0.021               |   |        |
| Quadratic trend P-value            | 0.216               |        | 0.463               |   |        |
| <b>High satisfaction with life</b> |                     |        |                     |   |        |
| Frequency of undertaking MVPA      |                     |        |                     |   |        |
| Never                              | 1 (ref)             |        | 1 (ref)             |   |        |
| 1-2 days                           | 1.99 (1.20 to 3.31) | 0.007  | 0.93 (0.63 to 1.36) |   | 0.722  |
| 3-4 days                           | 1.52 (0.90 to 2.55) | 0.111  | 1.44 (0.99 to 2.10) |   | 0.056  |
| 5-6 days                           | 2.02 (1.17 to 3.49) | 0.011  | 1.56 (0.98 to 2.49) |   | 0.059  |
| 7 days                             | 1.94 (1.09 to 3.44) | 0.023  | 2.00 (1.19 to 3.35) |   | 0.008  |
| Linear trend P-value               | 0.128               |        | <0.001              |   |        |
| Quadratic trend P-value            | 0.661               |        | 0.975               |   |        |

\* Adjusted for age, country of birth, smoking, alcohol consumption, BMI, consumption of fruit and vegetables, daily breakfast, time spent watching TV using computers, time spent studying, academic achievement, employment situation of the father and mother, socioeconomic status, country of birth of the father and mother, type of household, number of adults and number of minors in the household, satisfaction with family relationships and with friends.

Table 4. Linear models. Association between the amount of moderate-to-vigorous physical activity and health-related quality of life. Spanish adolescents aged 11–18 years, 2006.

|                               | Men                 |        | Women                 |        |
|-------------------------------|---------------------|--------|-----------------------|--------|
|                               | $\beta$ * (95% CI)  | P      | $\beta$ * (95% CI)    | P      |
| Frequency of undertaking MVPA |                     |        |                       |        |
| Never                         | 0 (ref)             |        | 0 (ref)               |        |
| 1-2 days                      | 1.61 (0.29 to 2.93) | 0.017  | 0.19 (- 0.71 to 1.10) | 0.676  |
| 3-4 days                      | 1.87 (0.50 to 3.24) | 0.007  | 1.19 (0.37 to 2.02)   | 0.005  |
| 5-6 days                      | 3.03 (1.74 to 4.31) | <0.001 | 2.79 (1.76 to 3.82)   | <0.001 |
| 7 days                        | 5.08 (3.73 to 6.43) | <0.001 | 5.09 (3.86 to 6.32)   | <0.001 |
| Linear trend P-value          | <0.001              |        | <0.001                |        |
| Quadratic trend P-value       | 0.006               |        | <0.001                |        |

\* Adjusted for age, country of birth, smoking, alcohol consumption, BMI, consumption of fruit and vegetables, daily breakfast, time spent watching TV and using computers, time spent studying, academic achievement, employment situation of the father and mother, socioeconomic status, country of birth of the father and mother, type of household, number of adults and number of minors in the household, satisfaction with family relationships and with friends.



1  
2  
3 Figure 1. Dose-response relationship of the amount of self-reported Moderate-to-  
4 Vigorous Physical Activity (MVPA) with optimal self-rated health, less health  
5 complaints, high satisfaction with life, and health-related quality of life among Spanish  
6 adolescents aged 11–18 years.  
7  
8  
9

10  
11 *Footnote:*

12 Curves represent adjusted odds ratios or mean differences (solid lines) and their 95%  
13 confidence intervals (dashed lines) based on restricted quadratic splines for the amount  
14 of MVPA with knots at 1, 3.5, and 6 days/week. The reference value (odds ratio = 1 and  
15 mean difference = 0) was set at 0 days/week of moderate-vigorous physical activity.  
16 Odds ratios and mean differences were obtained from logistic and linear regression  
17 models accounting for the complex survey and adjusted for personal and familial risk  
18 factors (see Methods). Bars represent the weighted bar charts of the amount of MVPA  
19 among men and women.  
20  
21  
22  
23  
24  
25  
26  
27  
28  
29  
30  
31  
32  
33  
34  
35  
36  
37  
38  
39  
40  
41  
42  
43  
44  
45  
46  
47  
48  
49  
50  
51  
52  
53  
54  
55  
56  
57  
58  
59  
60

1  
2  
3  
4  
5  
6  
7  
8  
9  
10  
11  
12  
13  
14  
15  
16  
17  
18  
19  
20  
21  
22  
23  
24  
25  
26  
27  
28  
29  
30  
31  
32  
33  
34  
35  
36  
37  
38  
39  
40  
41  
42  
43  
44  
45  
46  
47  
48  
49  
50  
51  
52  
53  
54  
55  
56  
57  
58  
59  
60



142x203mm (300 x 300 DPI)

Dear Editor,

We appreciate the suggestions and comments, which have helped us to improve the manuscript. Please find below the response to each individual comment and a detailed description of the changes made in the manuscript.  
We have highlighted in blue the response to the reviewers and in red the changes in the manuscript.

Yours sincerely,

Iñaki Galán  
Corresponding author

**Reviewer: Allana LeBlanc**  
PhD (candidate)  
Healthy Active Living and Obesity Research Group  
Canada

The author should work with others to improve the overall flow of the manuscript.

With respect to Tables 1 and Table 2, you've presented a great deal of information that doesn't relate directly to your research question and is not spoken to in-text. This makes the tables very long and takes a great deal of time to work through. It is suggested you either reduce the information you present in the tables such that it reflects more concisely what you have spoken to in the text, or you divide up the tables in such a way that it is easier for the reader to orientate to.

Authors:

In these tables, we only describe the characteristics of the sample in relation to dependent variables. As you can see, the information corresponds to the crude analysis of the data, emphasizing that most of the relationships are statistically significant. We did not describe this information in the text because, except for MVPA (the main independent variable), all of them were considered as potentially confounding variables. This has been now stated in the text to make it clear to the reader. Nevertheless, to reduce information, the columns corresponding to the number of individuals have been deleted, maintaining the totals in the subheadings of the columns.

**New sentence: The rest of potentially confounding variables considered, were also associated with self-rated health, less health complaints, high satisfaction with life and health-related quality of life (Tables 1 and 2).**

No reporting guidelines were provided therefor unable to tell if they are in line/with which guidelines

Authors:

The following text has been added in the Introduction, replacing “Although it is recommended that all adolescents should undertake Moderate-to-Vigorous Physical Activity (MVPA) on most days of the week,…”

1  
2  
3 New sentence: "Although the World Health Organization (WHO) recommends that all  
4 children of 5-17 years of age take at least 60 minutes of daily Moderate-to-Vigorous  
5 Physical Activity (MVPA),<sup>18</sup> ..." World Health Organization. *Global recommendations*  
6 *on physical activity for health. World Health Organization 2010.*  
7 [http://whqlibdoc.who.int/publications/2010/9789241599979\\_eng.pdf](http://whqlibdoc.who.int/publications/2010/9789241599979_eng.pdf).

8  
9  
10 I would like to congratulate you on putting together a manuscript that was quite  
11 interesting to read. Some considerations...

12  
13 Major points

14 - there is not enough justification for the use of self-report data. You have one sentence  
15 to this point in the discussion and it is unclear what you are eluding to ("although it has  
16 been an acceptable validation in our geographical coverage"). This was better explained  
17 in the "article summary".

18  
19  
20 Authors:

21 Thank you for pointing out this limitation of the study. We have rewritten the text in the  
22 Limitations subsection (Discussion): Second, the measurement of health status, MVPA  
23 and several covariables of the study is based on self-reported information. Although it is  
24 difficult to anticipate the magnitude and direction of the bias induced by measurement  
25 error in self-reported physical activity without validity or reproducibility substudies,  
26 some degree of attenuation in the underlying trends would be expected if the  
27 misclassification of physical activity status was nondifferential with respect to health  
28 outcomes. Nevertheless, the measurement of health status using subjective health scales,  
29 as in this present study, has been validated in previous studies,<sup>20,23,24,39,40</sup> and such scales  
30 are considered to be useful tools especially in the stage of adolescence, when  
31 psychological aspects are so important in the feeling of well-being among young  
32 people. The variable used for estimating MVPA has been previously validated in an  
33 adolescent population of Spain, obtaining an acceptable level of validity when  
34 compared with measurement using accelerometers.<sup>25</sup> Other variables, such as self-  
35 reported BMI or tobacco consumption, have also been validated in Spain, by comparing  
36 them with objective measurements.<sup>41,42</sup>

37  
38  
39 - to this, I find that at least some of the health related differences between boys and girls  
40 is due to gender differences in perception of physical activity and not the associated  
41 indicator of health

42  
43  
44 Authors:

45 We cannot rule out that some of the health related differences between boys and girls is  
46 due to gender differences in perception of physical activity. The evidence in the general  
47 population supporting the role of physical activity in the primary prevention of  
48 cardiovascular disease and diabetes is now seen to be as strong for women as it is for  
49 men, and the evidence supports an inverse dose-response relationship (*Brown WJ,*  
50 *Burton NW, Rowan PJ. Updating the evidence on physical activity and health in*  
51 *women. Am J Prev Med. 2007 Nov;33(5):404-411*). However, evidence about the effect  
52 on health status using subjective health scales is scarce, above all in adolescents.

53  
54  
55 - looking at the data presented in Table 3, it seems that the majority of health effects  
56 peak at 5-6 days, this is not addressed. It would have been interesting to see if it's at 5 or  
57 6 days that you see the true peak.

Authors:

You can see in the Figure 1 the dose-response relationship for each day of undertaking MVPA, using smooth dose-response curves based on restricted quadratic splines. In Tables 3-4, they were grouped into five categories to be able to estimate odds ratios with greater statistical power.

- most of your sample reported very high levels of health - it may be that you're only seeing significance in the relationship with MVPA because your sample size is so large

Authors:

We agree with the reviewer that sample size used in the survey facilitates statistical significance in the relationships. However, the magnitude, dose-response, and consistency between the four indicators support the association.

- have you calculated if there is a difference in those whom you have complete data on and those whom you have incomplete data (i.e. family SES, activity level, reported health)

Authors:

The sample used to analyse the data of this study, excluding missing values, was similar to the original sample. We attach below, comparisons between these two samples by gender, age, socioeconomic status, health status, and the frequency of undertaking MVPA.

The following text has been incorporated at the end of the first paragraph of Data analysis, in Methods section: **The sample excluding missing values was similar to the original, comparing the main socioeconomic variables, health status, and the frequency of undertaking MVPA.**

**Gender.** Original sample size

Number of obs = 21811

|        | Proportion | Linearized Std. Err. |
|--------|------------|----------------------|
| Gender |            |                      |
| Male   | .4692203   | .0093204             |
| Female | .5307797   | .0093204             |

Sample size excluding missing data

Number of obs = 17467

|        | Proportion | Linearized Std. Err. |
|--------|------------|----------------------|
| Gender |            |                      |
| Male   | .4560236   | .0098674             |
| Female | .5439764   | .0098674             |

**Age.** Original sample size

Number of obs = 21811

|     | Mean     | Linearized<br>Std. Err. |
|-----|----------|-------------------------|
| Age | 14.47145 | .1519659                |

Sample size excluding missing data

Number of obs = 17467

|     | Mean     | Linearized<br>Std. Err. |
|-----|----------|-------------------------|
| Age | 14.61931 | .1545347                |

**Socioeconomic status.** Original sample size

Number of obs = 21537

|                         | Proportion | Linearized<br>Std. Err. |
|-------------------------|------------|-------------------------|
| Socioeconomic<br>Status |            |                         |
| Low                     | .1579951   | .0072041                |
| Average                 | .4647503   | .0079537                |
| High                    | .3772545   | .0126104                |

Sample size excluding missing data

Number of obs = 17467

|                         | Proportion | Linearized<br>Std. Err. |
|-------------------------|------------|-------------------------|
| Socioeconomic<br>Status |            |                         |
| Low                     | .1503122   | .0072175                |
| Average                 | .465247    | .0080808                |
| High                    | .3844407   | .012937                 |

**Optimal self-rated health.** Original sample size

Number of obs = 21633

|            | Proportion | Linearized<br>Std. Err. |
|------------|------------|-------------------------|
| No optimal | .0910135   | .0041122                |
| Optimal    | .9089865   | .0041122                |

Sample size excluding missing data

Number of obs = 17467

|            | Proportion | Linearized Std. Err. |
|------------|------------|----------------------|
| No optimal | .0889121   | .004322              |
| Optimal    | .9110879   | .004322              |

**Frequency of undertaking physical activity (MVPA).** Original sample size

Number of obs = 21034

| Frequency | Proportion | Linearized Std. Err. |
|-----------|------------|----------------------|
| Never     | .0598736   | .0030626             |
| 1-2 days  | .2507102   | .0054253             |
| 2-3 days  | .3190528   | .00488               |
| 5-6 days  | .1793832   | .0041762             |
| 7 days    | .1909802   | .0058509             |

Sample size excluding missing data

Number of obs = 17467

| Frequency | Proportion | Linearized Std. Err. |
|-----------|------------|----------------------|
| Never     | .0587022   | .0033718             |
| 1-2 days  | .2499415   | .0060667             |
| 2-3 days  | .3192562   | .0054461             |
| 5-6 days  | .1821689   | .0043098             |
| 7 days    | .1899313   | .0060428             |

- this data is almost 7 years old, are you worried it is already out of date?

**Authors:**

It is expected that the mechanism underlying the dose-response relationship between physical activity and health status will not vary in the short or medium term.

- I disagree with your statement on p12149-57 - you've shown in this manuscript that youth are reporting significantly better health when they engage in 5-6 days of at least 60 min of MVPA, that is actually a considerable amount of PA and may be VERY intimidating to a sedentary individual. The way this is written is quite contradictory to the message you are sending elsewhere in the manuscript.

**Authors:**

As suggested, we have clarified the message, adding the following sentence:

Nevertheless, the maximum benefits were obtained according to public health recommendations, so the message should be: "even a little is good; more is better."<sup>36</sup> (Lee IM. Dose-response relation between physical activity and fitness: even a little is good; more is better. JAMA 2007; 297, 2137-2139).

Minor points

1  
2  
3 - there are some formatting errors in the references  
4

5 **Authors:**

6 We have checked the format of all references.  
7

8 - headings on your figure for gender are different in tables versus figures (i.e.  
9 males/females vs men/women)  
10

11 **Authors:**

12 Thank you for drawing our attention to this inconsistency. We have modified the labels  
13 of this variable in the tables.  
14

15  
16 - many points throughout the manuscript where the writing is awkward and should be  
17 worked on (e.g. p11,24-29, p11,52, p21,3-7, p12,49-57, p13,33-46, p14,29)  
18

19 Following your recommendation, a native-English speaking copy editor and proofreader  
20 has again reviewed the manuscript, paying special attention to the lines you mention  
21 above. The following are examples of the changes made:  
22

23  
24 Discussion (first paragraph), the new amended text is: 1) the magnitude of the effect,  
25 with benefits for optimal health reaching OR higher than 4 for males who undertook  
26 MVPA daily or on most days, as compared to those who never undertook it;  
27

28 Discussion: Dose-response relationship (last paragraph), the amended text follows: This  
29 could have important implications for the preventive recommendations, because  
30 (although 60 minutes of physical activity is currently recommended, if possible on a  
31 daily basis) the fact that positive results of a moderate magnitude can be achieved with  
32 very small amounts of MVPA may encourage the participation of the more sedentary  
33 people.  
34

35  
36 Conclusions (first line): The sentence has been clarified by emphasizing that the MVPA  
37 is "self-reported".  
38

39 - you are inconsistent with your use of MVPA vs PA  
40

41 **Authors:**

42 We have added MVPA instead of PA when referring to our data.  
43  
44

45 **Reviewer: Kirsten Corder**

46 Position: Investigator Scientist

47 Institution: MRC Epidemiology Unit, Cambridge, UK

48 I have no competing interests to declare.  
49

50  
51 This paper describes dose response associations between self-reported MVPA and self-  
52 reported health indicators among a very large sample of Spanish adolescents. The  
53 authors identify positive dose-response associations between self-reported MVPA and  
54 health which appear to be stronger among males. This is an interesting research  
55 question in a large sample; I have some comments which will hopefully be helpful in  
56 clarifying the manuscript.  
57  
58  
59  
60



1  
2  
3 Overall comments

4 Throughout the manuscript, the authors should be careful to clarify that this study  
5 examines associations between two sets of self-reported variables. Clarification of this  
6 in the title, abstract (e.g. objective and outcomes) and throughout would be useful.  
7

8 Authors:

9 As suggested, we have emphasized throughout the manuscript that measurements are  
10 self-reported variables.  
11

12 Specific comments

13 Abstract results – ‘improvement’ should really be rephrased, perhaps to ‘association’ as  
14 this study is cross-sectional.  
15

16 Authors:

17 As suggested we have modified the text, including the following sentence: As the  
18 frequency of MVPA increased, the association with health benefits was stronger.  
19

20 Article summary

21 Article focus – clarification of the specific PA guidelines for adolescents (e.g. 60 mins  
22 of MVPA) would be helpful.  
23

24 Authors:

25 As suggested we have added the following text in the Article summary: “Although it is  
26 recommended that all adolescents should undertake 60 minutes of daily Moderate-to-  
27 Vigorous Physical Activity (MVPA)...”  
28

29 Strengths/limitations – the self-report nature of the data is a major limitation and should  
30 be included here.  
31

32 Authors:

33 This major limitation is included in the last point of the Article summary: “A major  
34 limitation is the cross-sectional nature of the study. Moreover, the measurement of  
35 health status using subjective health scales and the estimation of MVPA are both based  
36 on self-reported information”.  
37

38 Introduction

39 Paragraph 2 – the authors state that there is little previous research examining MVPA  
40 and health, however the authors refer to some in the discussion (Iannotti et al) which  
41 perhaps should be included here. Additionally, Ekelund et al., JAMA 2012 is relevant to  
42 add here. More specific details about the PA recommendations would also be relevant  
43 to add here.  
44

45 Authors:

46 We have included the following paragraph:  
47 Ekelund et al.,<sup>17</sup> in a pooled data analysis of 14 studies in children and adolescents,  
48 found a direct benefit between three tertiles of Moderate-to-Vigorous Physical Activity  
49 (MVPA) in relation to cardiometabolic outcomes  
50

51 Paragraph 3 – it would be helpful to elaborate or give examples for ‘special  
52 characteristics’; this sentence could also benefit from clarification.  
53  
54  
55  
56  
57  
58  
59  
60

1  
2  
3 Authors:

4 The sentence has been rewritten, as follows:

5 It should be emphasized that concepts underlying health status in children and  
6 adolescents differ from those for adults. As young people are still developing, the  
7 measurement of health status must be approached from a global and comprehensive  
8 perspective for each individual.  
9

10 It is worthy of explanation as to why was only the Spanish HSBC sample used in this  
11 analysis.  
12

13  
14 Authors:

15 We had previously investigated the dose-response relationship between PA and self-  
16 reported health in an adult population of Spain. We wanted to reproduce this analysis in  
17 adolescents living in a similar environment, so taking into account the large sample size  
18 we decided to analyse the information from the HBSC of Spain.  
19

20  
21 Methods

22 Ethics approval for this study should be stated clearly.  
23

24 Authors:

25 We have included this phrase in Methods section: This study was approved by the  
26 Institutional Review Board of the Carlos III Institute of Health.  
27

28 Study population – more detail about how the multistage sampling, and how that took  
29 all of the listed factors into account is necessary as this is not currently clear from the  
30 information provided.  
31

32  
33 Authors:

34 We have added more information, as follows: “A multistage stratified random sampling  
35 was used, taking into account age strata (4 groups), region (17 autonomous  
36 communities), school site (rural and urban), and type of school (public and private).  
37 Initially, 480 schools were contacted of which 377 (103 private and 274 public schools)  
38 agreed to participate in the study, which represented a response rate of 78.5%. On  
39 average, three classes were selected in each school .....”  
40

41 Page 7, end of first paragraph. More detail about the standardisation of these scores  
42 would be relevant.  
43

44  
45 Authors:

46 We have added the following text: The items fulfil the assumptions of the Rasch model.  
47 To make the interpretation more applicable, the scores of the Rasch scales are translated  
48 into T-values with scale means of 50 and standard deviation of 10, with higher values  
49 indicating higher health-related quality of life.<sup>24</sup>  
50

51  
52 Page 7, second paragraph. Some information about the validity of the MVPA question  
53 is necessary here.  
54

55 Authors:  
56  
57  
58  
59  
60

1  
2  
3 As suggested, we have included the text as follows: This question, when compared with  
4 PA assessed by accelerometers in Spanish adolescents, has shown an acceptable  
5 validation.<sup>25</sup>  
6

7 There are many potential confounders included. It would be helpful to include rationale  
8 for the inclusion of these, and more information about their measurement.  
9

10 Authors:

11 As can be seen in the article of Sallis et al. (2000), cited in the paper, there are many  
12 determinants of physical activity in children and adolescents. These variables are  
13 potential confounders because they are also related to health status (see Tables 1-2). For  
14 this reason, we consider it relevant to include the pool of variables analysed in the  
15 study.  
16

17 We think that we provide sufficient information about these variables, taking into  
18 account that they are not the main variables of the study. In Tables 1-2, the categories of  
19 the variables are described in detail. However, should the reviewers or the editor  
20 consider it to be necessary, we would gladly add more information about their  
21 measurement.  
22

23 Data analysis

24 The authors state that the “Survey Data” module of STATA was used for analyses;  
25 however, some explanation of what this function actually does is necessary.  
26  
27

28 Authors:

29 The following sentence has now been added: Standard errors were computed by using  
30 the linearized variance estimator based on a first-order Taylor series.  
31

32 More detail about how the confounding variables were included in the models is  
33 necessary e.g. were these all added at once, were they added/removed stepwise? What  
34 happened if they were / were not significant?  
35  
36

37 Authors:

38 We have included this information: All of these co-variables were added simultaneously  
39 into the models.  
40

41 Clarification of the outcome and exposure variables in each model would be helpful in  
42 this section.  
43  
44

45 Authors:

46 We consider that the specification of the model can be seen in Tables 3 and 4.  
47 Nevertheless, we have changed the text in the Data analysis section (Methods section),  
48 as follows: Regression models were used, logistic ones for the estimation of the odds  
49 ratio of prevalence (OR) and linear ones for the calculation of the regression coefficients,  
50 adjusting for the potential confounding variables mentioned above. All co-variables were  
51 added simultaneously into the models. First, we calculated the association between the  
52 frequency of undertaking MVPA and health status by estimating OR for the following  
53 categories: 1-2 days, 3-4 days, 5-6 days, and 7 days, using ‘never’ as the reference.  
54 Second, linear and quadratic trends of the association between MVPA and the health  
55 indicators were calculated from the regression models. For the linear trend, the average  
56 value for each category was used modelling it as a continuous variable, while for the  
57  
58  
59  
60

quadratic trend the square of these values was used. Statistical significance was set at  $p < 0.05$ .

The authors describe methods for assessing quadratic trends. The data is all self-reported but the data is analysed with complicated models and this limitation should at least perhaps be mentioned in the manuscript.

Authors:

In the manuscript, the self-reported nature of the variables used in our study was highlighted as a major limitation. However, nonlinear dose-response models are frequently used to analyze risk trends associated to self-reported life-style and dietary factors (Carroll RJ, Ruppert D, Stefanski LA. *Measurement error in nonlinear models*. Boca Raton, FL: Chapman and Hall/CRC, 1995). Although it is difficult to anticipate the magnitude and direction of the bias induced by measurement error in self-reported physical activity without validity or reproducibility substudies, some degree of attenuation in the underlying trends would be expected if the misclassification of physical activity status was nondifferential with respect to health outcomes.

Results

It would be helpful to report differences in descriptive data for those with missing data compared to those included in analyses.

Authors:

Please see the detailed answer given to the first reviewer. The sample used to analyse the data of this study, excluding missing values, was similar to the original sample. We attach comparisons between these two samples by gender, age, socioeconomic status, health status, and the frequency of undertaking MVPA.

Authors report no significant interactions between MVPA and age. This is perhaps unexpected due to the previously reported age-related PA decline throughout adolescents. It is therefore relevant to mention this in the discussion.

Authors:

It is well known that PA declines with age. However, age does not interact with MVPA to change the relationship with health status.

Page 9. End of last paragraph. A brief explanation of the nature of the sex-MVPA interaction would be useful here.

Authors:

We think that the description of the interaction belongs with the results of the study and that, therefore, it is more appropriate to describe it in the Results section.

Top of Page 10. The authors mention stratified analyses. Presumably analyses were stratified after significant interactions were identified? This should be clarified.

Authors:

This is explained in the last paragraph of the Methods section: *Interactions between MVPA, age and sex were evaluated. Given that interactions were found in the*

1  
2  
3 *relationship between the frequency of MVPA and health status according to sex, the*  
4 *results are shown separately for men and women.*

5  
6  
7 Discussion

8 Terminology like 'protective effect' (top of page 11) and 'cause' (bottom of Page 11)  
9 should be rephrased due to the cross-sectional nature of the study.

10  
11 Authors:

12 This has been carried out with the text rephrased as follows:

13 - Top of page 11 (original version): "In females, the benefits were lower at low levels of  
14 frequency of MVPA".

15 - Bottom of Page 11 (original version): "The dose-response relationship between PA  
16 and health implies that increases in PA are related with additional improvements in  
17 health status"

18  
19  
20 Bottom of page 13. The limitation regarding measurement bias is probably the major  
21 limitation of this study and more explanation about how this may have influenced the  
22 results is necessary.

23  
24 Authors:

25 We have rewritten the text as follows:

26  
27 Second, the measurement of health status, MVPA and several covariables of the study is  
28 based on self-reported information. Although it is difficult to anticipate the magnitude  
29 and direction of the bias induced by measurement error in self-reported physical activity  
30 without validity or reproducibility substudies, some degree of attenuation in the  
31 underlying trends would be expected if the misclassification of physical activity status  
32 was nondifferential with respect to health outcomes. Nevertheless, the measurement of  
33 health status using subjective health scales, as in this present study, has been validated  
34 in previous studies,<sup>20,23,24,39,40</sup> and such scales are considered to be useful tools  
35 especially in the stage of adolescence, when psychological aspects are so important in  
36 the feeling of well-being among young people. The variable used for estimating MVPA  
37 has been previously validated in an adolescent population of Spain, obtaining an  
38 acceptable level of validity when compared with measurement using accelerometers.<sup>25</sup>  
39 Other variables, such as self-reported BMI or tobacco consumption, have also been  
40 validated in Spain, by comparing them with objective measurements.<sup>41,42</sup>

41  
42  
43 First paragraph Page 14. The authors state that the standard methodology across HSBC  
44 implies international comparability. A standard methodology does not imply this unless  
45 a comparison has been made across this standard methodology. The authors should  
46 therefore consider rephrasing this.

47  
48 Authors:

49 We have deleted this phrase in the new version of the manuscript.

50  
51  
52 Conclusions

53 These should be 'toned-down' due to the self-report nature of this data.

54  
55 Authors:

56 As suggested, we have toned-down the words taking into account the self-reported  
57 nature of the data:  
58  
59  
60

1  
2  
3 To sum up, an association was found between the frequency of undertaking self-  
4 reported MVPA and the health status of adolescents enrolled in schools in Spain. A  
5 linear trend was found for self-rated health, health complaints and for satisfaction with  
6 life. For health-related quality of life the relationship was quadratic. The benefits of  
7 MVPA on health were detected from very low levels, below those established by  
8 current recommendations. In general, the magnitude of association was lower in females  
9 than in males, a finding that needs to be explained by subsequent research.  
10

#### 11 Tables and figures

12 There is a lot of information presented in Tables 1 and 2. It is hard to get an overview of  
13 this information and perhaps simplifying these tables by not presenting this separately  
14 for health outcomes may be preferable.  
15

#### 16 Authors:

17 To reduce information, the columns corresponding to the number of individuals have  
18 been deleted, maintaining the totals in the subheadings of the columns.  
19

20 It would be helpful to plot the OR and Beta results in Tables 3 and 4 as figures with  
21 95% CI. This would allow the reader a better overview of the main results.  
22

#### 23 Authors:

24 We preferred to plot the relationship between PA and health status without imposing  
25 any particular function form the dose-response trends, based on regression models using  
26 restricted quadratic splines (Figure 1).  
27

28 It is apparent from the figures that relatively few participants reported doing 60 mins of  
29 MVPA 6 days per week (compared to 5 or 7). Could the authors comment on whether  
30 this is likely to be an artefact of self-reported data (e.g. participants who think they are  
31 active most days select 7 days rather than 6) or due to real differences?  
32

#### 33 Authors:

34 We do not have arguments to consider this to be an artefact of self-reported data  
35 although we cannot rule out this possibility. Males and females of all ages describe this  
36 distribution.  
37

#### 38 Literature

39 The authors state that there is little previous research examining MVPA and health,  
40 however the authors refer to some in the discussion (Iannotti et al) which perhaps  
41 should be included here. Additionally, Ekelund et al., JAMA 2012 is relevant to add  
42 here. More specific details about the PA recommendations would also be relevant to  
43 add here.  
44

#### 45 Authors:

46 We have included these references in the manuscript.  
47

#### 48 Reviewer: David Crawford

49 Head, School of Exercise and Nutrition Sciences  
50 Deakin University  
51 Australia  
52

1  
2  
3 This is a well written paper based on findings from a large population based study, in  
4 an under-studied group, namely adolescents. The major limitation of this paper is its  
5 cross-sectional study design, and while this is acknowledged by the authors, it is a  
6 major weakness.  
7

8 The cross-sectional nature of this study is a major weakness - eg possibility of reverse  
9 causality.  
10

11 **Authors:**

12 We agree with the reviewer. We have highlighted this major limitation in the  
13 manuscript, especially in the Discussion section (first paragraph of Strengths and  
14 weaknesses).  
15  
16  
17  
18  
19  
20  
21  
22  
23  
24  
25  
26  
27  
28  
29  
30  
31  
32  
33  
34  
35  
36  
37  
38  
39  
40  
41  
42  
43  
44  
45  
46  
47  
48  
49  
50  
51  
52  
53  
54  
55  
56  
57  
58  
59  
60



**Physical activity and health status among adolescents: a cross-sectional population-based study**

|                                 |                                                                                                                                                                                                                                                                                                                                                                                                 |
|---------------------------------|-------------------------------------------------------------------------------------------------------------------------------------------------------------------------------------------------------------------------------------------------------------------------------------------------------------------------------------------------------------------------------------------------|
| Journal:                        | <i>BMJ Open</i>                                                                                                                                                                                                                                                                                                                                                                                 |
| Manuscript ID:                  | bmjopen-2013-002644.R2                                                                                                                                                                                                                                                                                                                                                                          |
| Article Type:                   | Research                                                                                                                                                                                                                                                                                                                                                                                        |
| Date Submitted by the Author:   | 10-Apr-2013                                                                                                                                                                                                                                                                                                                                                                                     |
| Complete List of Authors:       | Galán, Iñaki; National Centre of Epidemiology, Boix, Raquel; National Centre of Epidemiology, Medrano, María José; National Centre of Epidemiology, Ramos, Pilar; Faculty of Psychology, University of Seville, Spain, Rivera, Francisco; University of Huelva, Pastor-Barriuso, Roberto; National Centre of Epidemiology, Moreno, Carmen; Faculty of Psychology, University of Seville, Spain, |
| <b>Primary Subject Heading</b>: | Public health                                                                                                                                                                                                                                                                                                                                                                                   |
| Secondary Subject Heading:      | Sports and exercise medicine                                                                                                                                                                                                                                                                                                                                                                    |
| Keywords:                       | Physical activity, Health status, Adolescents                                                                                                                                                                                                                                                                                                                                                   |
|                                 |                                                                                                                                                                                                                                                                                                                                                                                                 |

SCHOLARONE™  
Manuscripts



1  
2  
3 **Physical activity and self-reported health status among adolescents: a cross-sectional**  
4 **population-based study**  
5  
6

7 **Galán I,<sup>1,2</sup> Boix R,<sup>1</sup> Medrano MJ,<sup>1</sup> Ramos P,<sup>3</sup> Rivera F,<sup>4</sup> Pastor-Barriuso R,<sup>1,5</sup> Moreno C<sup>3</sup>**  
8  
9

10  
11  
12 <sup>1</sup> *Centro Nacional de Epidemiología. Instituto de Salud Carlos III* [National Centre of  
13 Epidemiology, Carlos III Institute of Health], Madrid (Spain)  
14

15  
16 <sup>2</sup> *Departamento de Medicina Preventiva y Salud Pública. Facultad de Medicina.*  
17 *Universidad Autónoma de Madrid* [Department of Preventive Medicine and Public  
18 Health, Faculty of Medicine, Autonomous University of Madrid], Madrid (Spain)  
19

20  
21 <sup>3</sup> *Departamento de Psicología Evolutiva y de la Educación. Facultad de Psicología.*  
22 *Universidad de Sevilla* [Department of Developmental and Educational Psychology,  
23 Faculty of Psychology, University of Seville], Seville (Spain)  
24  
25

26  
27 <sup>4</sup> *Departamento de Psicología Clínica, Experimental y Social. Universidad de Huelva*  
28 [Department of Clinical, Experimental and Social Psychology, University of Huelva],  
29 Huelva (Spain)  
30  
31

32  
33 <sup>5</sup> Consortium for Biomedical Research in Epidemiology and Public Health  
34 (CIBERESP), Spain  
35  
36  
37  
38  
39  
40  
41

42 **Keywords:** Physical activity, health status, adolescents  
43

44 **Word count:**  
45  
46  
47  
48

49 **Corresponding author:**

50 Iñaki Galán

51 Centro Nacional de Epidemiología, Madrid (Spain)

52 c/ Monforte de Lemos 5. CP: 28029

53 Telephone: +34 918222679

54 Fax: +34 913877815

55 e-mail: [igalan@isciii.es](mailto:igalan@isciii.es)  
56  
57  
58  
59  
60

## Abstract

**Objectives:** Little is known about the dose-response relationship between physical activity and health benefits among young people. Our objective was to analyse the association between the frequency of undertaking Moderate-to-Vigorous Physical Activity (MVPA) and the self-reported health status of the adolescent population.

**Design:** Cross-sectional study.

**Setting:** All regions of Spain.

**Participants:** Students aged 11-18 years participating in the Spanish Health Behaviour in School-aged Children (HBSC) survey 2006. A total of 375 schools and 21,188 students were selected.

**Main outcomes:** The frequency of undertaking MVPA was measured by questionnaire, as were the following four health indicators: self-rated health, health complaints, satisfaction with life, and health-related quality of life. Linear and logistic regression models were used to analyse the association, adjusting for potential confounding variables and the modelling of the dose-response relationship.

**Results:** As the frequency of MVPA increased, the association with health benefits was stronger. A linear trend ( $p < 0.05$ ) was found for self-rated health and health complaints in males and females, and for satisfaction with life among females; for health-related quality of life, this relationship was quadratic for both sexes ( $p < 0.05$ ). For self-reported health and health complaints, the effect was found to be of greater magnitude in males than in females and, in all scales, the benefits were observed from the lowest frequencies of MVPA, especially in males.

**Conclusions:** A protective effect of MVPA was found in both sexes for the four health indicators studied, and this activity had a gradient effect. Among males, health benefits

1  
2  
3  
4  
5  
6  
7  
8  
9  
10  
11  
12  
13  
14  
15  
16  
17  
18  
19  
20  
21  
22  
23  
24  
25  
26  
27  
28  
29  
30  
31  
32  
33  
34  
35  
36  
37  
38  
39  
40  
41  
42  
43  
44  
45  
46  
47  
48  
49  
50  
51  
52  
53  
54  
55  
56  
57  
58  
59  
60

were detected from very low levels of physical activity and the magnitude of the relationship was greater than that for females.

For peer review only

## Article summary

### Article focus

- Although it is recommended that all adolescents should undertake 60 minutes of daily Moderate-to-Vigorous Physical Activity (MVPA), little is known about the nature of the relationship in this population, and whether or not the effect varies depending on age and sex.
- We examined cross-sectional associations between the frequency of undertaking self-reported MVPA and the health status of the adolescent population, using subjective health scales that are considered to be useful tools especially in the stage of adolescence, when psychological aspects are so important in the feeling of well-being among young people.

### Key messages

- The protective effect of MVPA on health was detected from very low levels, below those established by current recommendations.
- A linear trend was found for self-rated health, health complaints and for satisfaction with life. For health-related quality of life the relationship was quadratic.
- The positive effect on health produced lower results in females than in males.

### Strengths and limitations of this study

- The main strength is the representativeness and large size of the sample. The methodology employed is the standard one for the HBSC study in which more than 40 Western countries have participated.
- A major limitation is the cross-sectional nature of the study. Moreover, the measurement of health status using subjective health scales and the estimation of MVPA are both based on self-reported information.

## INTRODUCTION

According to the World Health Organization (WHO)<sup>1</sup>, physical inactivity is the fourth most important risk factor affecting global mortality, to which nearly 6% of all deaths are attributed. In the adolescent population, short-term benefits related to Physical Activity (PA) are improvements in lipid profile, blood pressure, metabolic syndrome, muscular strength and bone density, together with a reduction in obesity and overweight levels, as well as a decrease in emotional problems and depressive symptoms.<sup>2-5</sup> Moreover, young people who undertake PA adopt healthy behaviour more easily and have better levels of academic achievement and cognitive functioning.<sup>4, 6-8</sup>

The dose-response relationship between physical activity and various health indicators has mainly been studied in the adult population,<sup>9-15</sup> where there is still a controversy about whether or not this relationship is linear.<sup>12,16</sup> Ekelund et al.,<sup>17</sup> in a pooled data analysis of 14 studies in children and adolescents, found a direct benefit between three tertiles of Moderate-to-Vigorous Physical Activity (MVPA) in relation to cardiometabolic outcomes. Although the WHO recommends that all children of 5-17 years of age take at least 60 minutes of daily MVPA,<sup>18</sup> little is known about the nature of the relationship in this population. Therefore, finding out the effect on health of several levels of PA could have important implications for improving the recommendations regarding this activity.

It should be emphasized that concepts underlying health status in children and adolescents differ from those for adults. As young people are still developing, the measurement of health status must be approached from a global and comprehensive perspective for each individual. Concepts such as 'subjective health' and 'health-related quality of life' cover complex physical, emotional, mental and social aspects.<sup>19,20</sup> Hence,

1  
2  
3 it is important to evaluate if the effect of the PA is distributed in a distinct way for the  
4  
5 different dimensions of health status.  
6

7  
8 Finally, although PA varies considerably depending on age and sex,<sup>21</sup> to our knowledge  
9  
10 there have been very few studies in the literature about the role that these variables play  
11  
12 regarding the effect of PA on health.<sup>4</sup>  
13

14  
15 The objective of this study was to analyse the association between the frequency of  
16  
17 undertaking MVPA and the different dimensions of adolescent health status, assessing if  
18  
19 this relationship differs according to age and sex.  
20  
21

## 22 23 24 25 **METHODS**

### 26 27 **Study population**

28  
29  
30 The source of information was the Health Behaviour in School-aged Children (HBSC)  
31  
32 study carried out in 2006.<sup>22</sup> The population was a representative sample of  
33  
34 preadolescents and adolescents, with an age range of 11-18 years, resident in Spain and  
35  
36 enrolled in school from the 5th year of primary school to the last year of upper  
37  
38 secondary school (2nd year of baccalaureate). A multistage stratified random sampling  
39  
40 was used, taking into account age strata (4 groups), region (17 autonomous  
41  
42 communities), school site (rural and urban), and type of school (public and private).  
43  
44 Initially, 480 schools were contacted of which 377 (103 private and 274 public schools)  
45  
46 agreed to participate in the study, which represented a response rate of 78.5%. On  
47  
48 average, three classes were selected in each school. A total of 22,350 questionnaires  
49  
50 were collected, although subsequently 539 were excluded because of non-response to  
51  
52 questions about sex and age, or lack of response to more than 50% of the questionnaire.  
53  
54  
55  
56  
57 The sample size was 21,811 participants. The study was carried out in spring 2006.  
58  
59  
60

1  
2  
3 Previously trained survey technicians visited the selected schools, where the students  
4  
5 completed an anonymous questionnaire during normal school hours.  
6

7  
8 This study was approved by the Institutional Review Board of the Carlos III Institute of  
9  
10 Health .

### 11 12 **Study variables**

13  
14  
15 Health status was measured using four indicators: 1) self-rated health was measured using  
16  
17 the question “*Would you say that your health is: excellent, good, fair or bad*”. Optimal  
18  
19 health status was categorized by a response of excellent or good, and sub-optimal health  
20  
21 status was categorized by a response of fair or bad. 2) The health complaints indicator  
22  
23 was assessed using a scale based on the HBSC-Symptom Checklist, which is a list of  
24  
25 eight physical and psychological symptoms (headaches, abdominal pain, backache,  
26  
27 feeling low, irritability, nervousness, sleeping difficulties and dizziness), to estimate their  
28  
29 frequency during the last six months. Having 2 or more symptoms with a frequency of  
30  
31 several times a week or daily was considered to define having noticeable subjective  
32  
33 health complaints.<sup>19</sup> 3) Satisfaction with life was estimated using the Cantril Ladder,<sup>23</sup> in  
34  
35 which, using a scale from 0 to 10, the participant was asked “*on which rung of the ladder*  
36  
37 *(scale from 0 to 10) do you feel you stand at this moment in your life?*”, with 0 being the  
38  
39 worst score and 10 the best. A score of 0 to 5 was categorized as dissatisfied, whereas a  
40  
41 score of 6 to 10 was categorized as satisfied.<sup>19</sup> 4) Health-related quality of life was  
42  
43 measured using the Kidscreen-10 index,<sup>24</sup> a series of 10 questions about mood, ability to  
44  
45 concentrate, energy, vitality, well-being, ability to have fun with friends. Each question  
46  
47 has five categories of response ranging from “never” to “always” or from “not at all” to  
48  
49 “extremely often”. The items fulfil the assumptions of the Rasch model. To make the  
50  
51 interpretation more applicable, the scores of the Rasch scales are translated into T-values  
52  
53  
54  
55  
56  
57  
58  
59  
60

1  
2  
3 with scale means of 50 and standard deviation of 10, with higher values indicating higher  
4 health-related quality of life.<sup>24</sup>  
5  
6

7  
8 The frequency of MVPA was measured using the question: “*in the last seven days,*  
9 *considering moderate and vigorous activity... On how many days did you feel you were*  
10 *physically active for a total of 60 minutes per day?*” The response categories were from 0  
11 to 7 days. This question, when compared with PA assessed by accelerometers in Spanish  
12 adolescents, has shown an acceptable validation (Spearman correlation=0.43).<sup>25</sup>  
13  
14  
15  
16  
17

18  
19 The following factors were considered as potentially confounding variables for the  
20 association between health status and frequency of MVPA: 1) personal variables (sex,  
21 age, country of birth, current smoker, alcohol consumption, body-mass index –calculated  
22 as the ratio of weight in kg/height in m<sup>2</sup> from self-reported weight and height, and  
23 defining overweight and obesity using the cut-off points proposed by Cole et al.,<sup>26</sup>  
24 consumption of fruit and vegetables, daily breakfast, number of hours each day spent  
25 watching television and using computers or game consoles, number of hours each day  
26 spent doing school homework); 2) family variables (employment status of the father,  
27 employment status of the mother, family purchasing power –measured by the Family  
28 Affluence Scale,<sup>27</sup> an index estimated by four items: number of times that the adolescents  
29 have been on holiday with their family in the last 12 months; does the family own a car or  
30 van; does the student have his/her own bedroom; number of computers owned by the  
31 family-, country of birth of the father, country of birth of the mother, type of household –  
32 both parents, single parent, blended family–, number of minors in the household, number  
33 of adults in the household); and 3) relationships with the school, the family and friends  
34 (academic achievement, satisfaction with family relationships, satisfaction with  
35 relationships with friends). The variables are categorized in Table 1.  
36  
37  
38  
39  
40  
41  
42  
43  
44  
45  
46  
47  
48  
49  
50  
51  
52  
53  
54  
55  
56  
57  
58  
59  
60



### Data analysis

The questionnaires with missing values were excluded from data analysis, so that the number of subjects studied was 17,467 for self-rated health; 17,358 for satisfaction with life; 16,803 for health complaints; and 16,560 for health-related quality of life. The sample excluding missing values was similar to the original (there was no statistically significant difference), comparing the main socioeconomic variables, health status, and the frequency of undertaking MVPA.

The complex sampling design was taken into account during analysis by using the “Survey Data” module of the statistical package Stata v11. Standard errors were computed by using the linearized variance estimator based on a first-order Taylor series. Prevalence was calculated for optimal self-rated health, low level of health complaints, high satisfaction with life, and the means for the scores on the scale for health-related quality of life, with 95% confidence intervals, both global and for the categories of each one of the exposure variables.

Regression models were used, logistic ones for the estimation of the odds ratio of prevalence (OR) and linear ones for the calculation of the regression coefficients, adjusting for the potential confounding variables mentioned above. All co-variables were added simultaneously into the models. First, we calculated the association between the frequency of undertaking MVPA and health status by estimating OR for the following categories: 1-2 days, 3-4 days, 5-6 days, and 7 days, using ‘never’ as the reference. Second, linear and quadratic trends of the association between MVPA and the health indicators were calculated from the regression models. For the linear trend, the average value for each category was used modelling it as a continuous variable, while for the quadratic trend the square of these values was used. Statistical significance was set at  $p < 0.05$ .

1  
2  
3 To further explore the relationships between MVPA and health status indicators without  
4 imposing any particular functional form for the dose-response trends, the amount of  
5 moderate-to-vigorous physical activity was entered in regression models using restricted  
6 quadratic splines with knots at 1, 3.5, and 6 days/week.<sup>28</sup> Restricted quadratic splines  
7 allow for different quadratic trends within each intermediate category and linear trends in  
8 boundary categories, and hence they can accommodate a wide variety of smooth dose-  
9 response curves, while avoiding implausible shapes at the tails of the exposure  
10 distribution.  
11  
12  
13  
14  
15  
16  
17  
18  
19

20  
21 Interactions between MVPA, age and sex were evaluated. Given that interactions were  
22 found in the relationship between the frequency of MVPA and health status according to  
23 sex, the results are shown separately for males and females.  
24  
25  
26  
27  
28  
29  
30

## 31 RESULTS

32  
33 Table 1 describes the health status of the questionnaire respondents, as estimated by the  
34 four health indicators. A total of 91.1% (CI 95%: 90.3-92.0) declared they had an  
35 optimal self-rated health, 67.4% (CI 95%: 66.1-68.5) had a low level of health  
36 complaints and 90.9% (CI 95%: 90.1-91.6) reported a high satisfaction with life. The  
37 mean score on the scale for health-related quality of life was 47.1 (CI 95%: 46.5- 47.6).  
38  
39  
40  
41  
42  
43  
44

45 According to all the indicators used, the level of health was better, in a statistically  
46 significant way, for the questionnaire respondents who indicated that they undertook  
47 MVPA more frequently, with gradual increases depending on the categories of MVPA  
48 (Table 1). The rest of potentially confounding variables considered, were also associated  
49 with self-rated health, less health complaints, high satisfaction with life and health-  
50 related quality of life (Tables 1 and 2).  
51  
52  
53  
54  
55  
56  
57  
58  
59  
60

1  
2  
3 No statistically significant interactions were found between MVPA and age, whereas  
4  
5 statistical significance was reached between MVPA and sex for the indicators self-rated  
6  
7 health and satisfaction with life.  
8  
9

10 Tables 3 and 4 and Figure 1 show the results of the multivariate analysis that evaluated, for  
11  
12 each sex separately, the association of the frequency of undertaking MVPA with the  
13  
14 different indicators of health status, controlling the effect on this association of personal and  
15  
16 family factors. For both boys and girls, there was a positive, graded and statistically  
17  
18 significant association (linear trend,  $p < 0.001$ ) between MVPA and self-rated health (Table  
19  
20 3), with odds ratios (OR) that ranged in males from 2.37, for those who undertook MVPA  
21  
22 on 1-2 days, to 4.60 and 4.05, for those undertaking it on 5-6 and 7 days, respectively.  
23  
24 Moving from less than 5 days to 5-6 days of MVPA, the OR increased from 2.34 to 4.60. In  
25  
26 females, although a positive association was also found, the magnitude of the benefits on  
27  
28 self-reported health was lower, with values that were half those for the males (OR= 2.14, if  
29  
30 MPVA undertaken 7 days).  
31  
32  
33  
34

35 Regarding less health complaints (Table 3), an increase in the positive effects was seen in  
36  
37 males from small amounts of MVPA on 1-2 days (OR=1.66,  $p=0.008$ ), which increased  
38  
39 further to an OR of nearly 2 for MVPA on 5-6 days. In females, this effect was lower,  
40  
41 reaching statistical significance after MVPA on 5-6 days with an OR of 1.46 ( $p=0.009$ ). The  
42  
43 linear trend p-value was statistically significant ( $p < 0.001$ ) in both males and females.  
44  
45

46 The degree of satisfaction with life (Table 3) was also shown to be significantly associated  
47  
48 with the frequency of undertaking MVPA; among the boys the OR for high satisfaction  
49  
50 increased to 1.99 if physical activity was undertaken on 1-2 days per week, and satisfaction  
51  
52 remained at these values for frequencies of more than 5 days of MVPA. In girls, the  
53  
54 magnitude of the effect was similar, but the gradient was steeper. The linear trend p-value  
55  
56 was statistically significant for females ( $p < 0.001$ ), but not for males.  
57  
58  
59  
60

1  
2  
3 Table 4 shows the same analysis applied to health-related quality of life, considering it  
4 as a continuous variable and using linear regression to analyse it. In males, an increasing  
5 dose-response effect was seen, especially noticeable after 5-days per week of MVPA  
6 ( $\beta=3.03$ ), which increased even further, to 5.08, for those undertaking MVPA for 7-days  
7 per week. In females, the benefits were lower at low levels of frequency of MVPA, but  
8 reached the same magnitude from 5 days of MVPA. Overall, this indicator was the one  
9 that showed fewer differences between boys and girls, as can be seen in Figure 1. The  
10 quadratic trend p-value was statistically significant in males ( $p=0.006$ ) and females  
11 ( $p<0.001$ ).

## 22 23 24 25 26 **DISCUSSION**

### 27 28 **Principal findings**

29  
30 The results of this study clearly show the benefits of undertaking physical activity on the  
31 health status of adolescents enrolled in schools in Spain. The following results should be  
32 highlighted: 1) the magnitude of the effect, with benefits for optimal health reaching OR  
33 higher than 4 for males who undertook MVPA daily or on most days, as compared to  
34 those who never undertook it; 2) the existence of a dose-response effect, with the  
35 positive effects increasing in accordance with the increase in the frequency of MVPA; 3)  
36 the consistency of the results with the association present for the four health indicators in  
37 both sexes; and 4) the greater positive effect in males, especially at low levels of  
38 frequency of MVPA.

39  
40 Few studies have linked the effect of MPVA on general indicators of health status in  
41 adolescents. Using data from the HBSC study for adolescents from North America,  
42 Western Europe, Eastern Europe, Northern Europe and Southern Europe, Iannotti et al.<sup>29</sup>  
43  
44  
45  
46  
47  
48  
49  
50  
51  
52  
53  
54  
55  
56  
57  
58  
59  
60

1  
2  
3 evaluated the relationship between the frequency of PA and self-rated health, health  
4 complaints and satisfaction with life and found, as in our study, beneficial effects for all  
5 three indicators.  
6  
7  
8

### 9 10 **Dose-response relationship**

11  
12 The dose-response relationship between PA and health implies that increases in PA are  
13 related with additional improvements in health status, even when it is not undertaken  
14 very frequently. This has also been found in other studies regarding dyslipidemia, blood  
15 pressure, overweight and obesity, metabolic syndrome and mental health.<sup>4,30-32</sup> However,  
16 to our knowledge, there are no comparable studies that measure the nature of the  
17 relationship on general indicators of health status. Indeed, there is a controversy about  
18 whether this relationship is linear or curvilinear, as some studies have found linear  
19 patterns, whereas others have not,<sup>4,30-32</sup> probably because the patterns can be different  
20 depending upon the health effect that is being assessed. In our study, a curvilinear  
21 relationship was found with a slight slowdown in the health benefits beyond 3-4 days of  
22 MVPA in the following indicators: self-rated health; health complaints; and satisfaction  
23 with life. In contrast, for health-related quality of life in both sexes, the benefits  
24 increased from these intermediate levels of MVPA. These differences in the dose-  
25 response relationship suggest that the effect varies depending upon the different  
26 dimensions of health status to which the indicators are related. Although self-rated  
27 health has been proposed as a measurement of the summary effect of multiple  
28 dimensions of health, it is more closely related to the physical dimension rather than the  
29 mental and social ones.<sup>33</sup> Similarly, the scale for health complaints is related to  
30 symptoms with psychosomatic components very frequently associated with  
31 adolescence.<sup>34</sup> Yet, the scale for the quality of life, besides including such physical and  
32 mental dimensions, also incorporates family and social relationships, which could  
33  
34  
35  
36  
37  
38  
39  
40  
41  
42  
43  
44  
45  
46  
47  
48  
49  
50  
51  
52  
53  
54  
55  
56  
57  
58  
59  
60

1  
2  
3 suggest that these additional dimensions may be involved in the achieving of greater  
4  
5 health benefits with the maximum frequencies of MVPA.  
6

7  
8 It should be stressed that the benefits to health status are obtained from low levels of  
9  
10 MVPA, especially for boys. Similar results have been reported for self-rated health in a  
11  
12 young adult population<sup>35</sup> and regarding blood pressure and dyslipidemia in  
13  
14 adolescents.<sup>31,32</sup> This could have important implications for the preventive  
15  
16 recommendations, because (although 60 minutes of physical activity is currently  
17  
18 recommended, if possible on a daily basis) the fact that positive results of a moderate  
19  
20 magnitude can be achieved with very small amounts of MVPA may encourage the  
21  
22 participation of the more sedentary people. Nevertheless, the maximum benefits were  
23  
24 obtained according to public health recommendations, so the message should be: “even a  
25  
26 little is good; more is better”.<sup>36</sup>  
27  
28  
29

### 30 **Gender differences**

31  
32  
33 The results in health that are derived from undertaking MVPA are greater in males,  
34  
35 especially in self-rated health and, to a lesser extent, in having less health complaints.  
36  
37 According to our study, females need to undertake more days of MVPA to obtain  
38  
39 similar health benefits. However, the effect on satisfaction with life and health-related  
40  
41 quality of life was fairly similar in males and females. These differences suggest that the  
42  
43 variation of the effect of MVPA according to sex could also be associated to different  
44  
45 dimensions of health status. Previous reviews have clearly shown important differences  
46  
47 between males and females in the quantity, intensity and type of physical activity, and  
48  
49 that, in part, these distinctions could be explained by biological differences and those  
50  
51 relating to sociocultural environment and body image.<sup>21,37</sup> It would, therefore, be  
52  
53 interesting for subsequent studies to undertake detailed research about this relationship.  
54  
55  
56  
57

### 58 **Strengths and weaknesses**

1  
2  
3 To aid correct interpretation of these data, several limitations should be mentioned. First,  
4  
5 the limitation in causal inference, stemming from the cross-sectional nature of the study,  
6  
7 would theoretically affect the temporality of the association. That is, people who have  
8  
9 health problems can have limitations in undertaking physical exercise. However, from  
10  
11 the data of the National Health Survey of 2006,<sup>38</sup> only 1.7% of adolescents between 16  
12  
13 and 19 years do not undertake the leisure time physical exercise that they would like to  
14  
15 take because of health problems, hence, this figure would not affect the results obtained.  
16  
17 Second, the measurement of health status, MVPA and several covariables of the study is  
18  
19 based on self-reported information. Although it is difficult to anticipate the magnitude  
20  
21 and direction of the bias induced by measurement error in self-reported physical activity  
22  
23 without validity or reproducibility substudies, some degree of attenuation in the  
24  
25 underlying trends would be expected if the misclassification of physical activity status  
26  
27 was nondifferential with respect to health outcomes. Nevertheless, the measurement of  
28  
29 health status using subjective health scales, as in this present study, has been validated in  
30  
31 previous studies,<sup>20,23,24,39,40</sup> and such scales are considered to be useful tools especially in  
32  
33 the stage of adolescence, when psychological aspects are so important in the feeling of  
34  
35 well-being among young people. The variable used for estimating MVPA has been  
36  
37 previously validated in an adolescent population of Spain, obtaining an acceptable level  
38  
39 of validity when compared with measurement using accelerometers.<sup>25</sup> Other variables,  
40  
41 such as self-reported BMI or tobacco consumption, have also been validated in Spain, by  
42  
43 comparing them with objective measurements.<sup>41,42</sup> Third, it has not been possible to  
44  
45 differentiate the effect of the intensity of physical activity, which is a dimension  
46  
47 independently related with self-rated health.<sup>35</sup>

48  
49 The main strengths of this study are the representativeness and large size of the sample  
50  
51 used, which means that the results can be extrapolated accurately, and that the  
52  
53  
54  
55  
56  
57  
58  
59  
60

1  
2  
3 methodology employed is the standard one for the HBSC study. This is a collaborative  
4  
5 WHO study in which more than 40 Western countries (including Spain) have  
6  
7 participated.  
8

## 9 10 **CONCLUSIONS**

11  
12 To sum up, an association was found between the frequency of undertaking self-reported  
13  
14 MVPA and the health status of adolescents enrolled in schools in Spain. A linear trend  
15  
16 was found for self-rated health, health complaints and for satisfaction with life. For  
17  
18 health-related quality of life the relationship was quadratic. The benefits of MVPA on  
19  
20 health were detected from very low levels, below those established by current  
21  
22 recommendations. In general, the magnitude of association was lower in females than in  
23  
24 males, a finding that needs to be explained by subsequent research.  
25  
26  
27  
28  
29  
30

31  
32 **Acknowledgments:** We thank the teachers, principals and participants for their  
33  
34 generous contribution to this study.  
35

36  
37 **Contributors:** All authors were involved in the development of the design of the study.  
38  
39 PR, FR and CM coordinated the field work and collected the data. IG, RB, MM and RP  
40  
41 conducted the analyses. IG and RB prepared the first draft. All authors contributed to the  
42  
43 interpretation of data and revision of the manuscript. All authors approved the final  
44  
45 version.  
46

47  
48 **Funding:** This study has been funded by the *Consejo Superior de Deportes* [National  
49  
50 Sports Council] and the *Ministerio de Sanidad, Servicios Sociales e Igualdad* [Ministry  
51  
52 of Health and Social Policy].  
53

54  
55 **Competing interests:** None.  
56  
57  
58  
59  
60



1  
2  
3 **Ethics approval:** This study was approved by the Institutional Review Board of the  
4  
5 Carlos III Institute of Health.  
6

7  
8 **Provenance and peer review:** Not commissioned; externally peer reviewed.  
9

10 **Data sharing statement:** Full results of the Spanish HBSC study are available at  
11  
12 <http://www.msps.es/profesionales/saludPublica/prevPromocion/promocion/saludJovenes>  
13  
14 [/estudioHBSC/nacional\\_hbsc.htm](http://www.msps.es/profesionales/saludPublica/prevPromocion/promocion/saludJovenes)  
15  
16  
17  
18  
19  
20  
21  
22  
23  
24  
25  
26  
27  
28  
29  
30  
31  
32  
33  
34  
35  
36  
37  
38  
39  
40  
41  
42  
43  
44  
45  
46  
47  
48  
49  
50  
51  
52  
53  
54  
55  
56  
57  
58  
59  
60

## REFERENCES

1. World Health Organization. Global Strategy on Diet, Physical Activity and Health.  
[http://www.who.int/dietphysicalactivity/strategy/eb11344/strategy\\_english\\_web.pdf](http://www.who.int/dietphysicalactivity/strategy/eb11344/strategy_english_web.pdf)  
(accessed Dec 2012).
2. Biddle SJ, Asare M. Physical activity and mental health in children and adolescents: a review of reviews. *Br J Sports Med* 2011, 45:886-95.
3. Hallal PC, Victora CG, Azevedo MR, *et al.* Adolescent physical activity and health: a systematic review. *Sports Med* 2006, 36:1019-30.
4. Janssen I, Leblanc AG. Systematic review of the health benefits of physical activity and fitness in school-aged children and youth. *Int J Behav Nutr Phys Act* 2010, 7:40.
5. Strong WB, Malina RM, Blimkie CJ, *et al.* Evidence based physical activity for school-age youth. *J Pediatr* 2005, 146:732-7.
6. Physical Activity Guidelines Advisory Committee report, 2008. To the Secretary of Health and Human Services. Part A: executive summary. *Nutr Rev* 2009, 67; 114-20.
7. Janssen I. Physical activity guidelines for children and youth. *Can J Public Health* 2007, 98 Suppl 2:109-21.
8. Fedewa A, Ahn S. The effects of physical activity and physical fitness on children's achievement and cognitive outcomes: a meta-analysis. *Res Q Exerc Sport* 2011, 82:521-35.
9. Abu-Omar K, Rutten A, Robine JM. Self-rated health and physical activity in the European Union. *Soz Praventivmed* 2004, 49:235-42.

- 1  
2  
3 10. Haennel RG, Lemire F. Physical activity to prevent cardiovascular disease. How much is  
4  
5 enough? *Can Fam Physician* 2002, 48:65-71.  
6  
7  
8 11. Kim K, Shin YJ, Nam JH, *et al*. A dose-response relationship between types of physical  
9  
10 activity and distress. *J Korean Med Sci* 2008, 23:218-25.  
11  
12  
13 12. Lee IM, Skerrett PJ. Physical activity and all-cause mortality: what is the dose-response  
14  
15 relation? *Med Sci Sports Exerc* 2001, 33 Suppl 6:459-71.  
16  
17  
18 13. Martin CK, Church TS, Thompson AM, *et al*. Exercise dose and quality of life: a  
19  
20 randomized controlled trial. *Arch Intern Med* 2009, 169:269-78.  
21  
22  
23 14. Mayer-Davis EJ, D'Agostino R, Jr., Karter AJ, *et al*. Intensity and amount of physical  
24  
25 activity in relation to insulin sensitivity: the Insulin Resistance Atherosclerosis Study.  
26  
27 *JAMA* 1998, 279:669-74.  
28  
29  
30 15. Ohkawara K, Tanaka S, Miyachi M, *et al*. A dose-response relation between aerobic  
31  
32 exercise and visceral fat reduction: systematic review of clinical trials. *Int J Obes (Lond)*  
33  
34 2007, 31:1786-97.  
35  
36  
37 16. Lollgen H, Bockenhoff A, Knapp G. Physical activity and all-cause mortality: an updated  
38  
39 meta-analysis with different intensity categories. *Int J Sports Med* 2009, 30:213-24.  
40  
41  
42 17. Ekelund U, Luan J, Sherar LB, *et al*. Moderate to vigorous physical activity and sedentary  
43  
44 time and cardiometabolic risk factors in children and adolescents. *JAMA* 2012, 307:704-  
45  
46 12.  
47  
48  
49 18. World Health Organization. Global recommendations on physical activity for health.  
50  
51 World Health Organization 2010.  
52  
53 [http://whqlibdoc.who.int/publications/2010/9789241599979\\_eng.pdf](http://whqlibdoc.who.int/publications/2010/9789241599979_eng.pdf) (accessed Feb  
54  
55 2013).  
56  
57  
58  
59  
60

- 1  
2  
3  
4  
5  
6  
7  
8  
9  
10  
11  
12  
13  
14  
15  
16  
17  
18  
19  
20  
21  
22  
23  
24  
25  
26  
27  
28  
29  
30  
31  
32  
33  
34  
35  
36  
37  
38  
39  
40  
41  
42  
43  
44  
45  
46  
47  
48  
49  
50  
51  
52  
53  
54  
55  
56  
57  
58  
59  
60
19. Ravens-Sieberer U, Torsheim T, Hetland J, *et al.* Subjective health, symptom load and quality of life of children and adolescents in Europe. *Int J Public Health* 2009, 54 Suppl 2:151-9.
20. Ravens-Sieberer U, Erhart M, Wille N, *et al.* Generic health-related quality-of-life assessment in children and adolescents: methodological considerations. *Pharmacoeconomics* 2006, 24:1199-220.
21. Sallis JF, Prochaska JJ, Taylor WC. A review of correlates of physical activity of children and adolescents. *Med Sci Sports Exerc* 2000, 32:963-75.
22. Currie C, Nic GS, Godeau E. The Health Behaviour in School-aged Children: WHO Collaborative Cross-National (HBSC) study: origins, concept, history and development 1982-2008. *Int J Public Health* 2009, 54 Suppl 2:131-9.
23. Curries, CE, Gabhainn, SN, Godeau, E. Inequalities in young people Health. HBSC International report from the 2005/2006 Survey. WHO Regional Office for Europe, Copenhagen, Denmark.  
[http://www.euro.who.int/\\_data/assets/pdf\\_file/0005/53852/E91416.pdf](http://www.euro.who.int/_data/assets/pdf_file/0005/53852/E91416.pdf) (accessed Dec 2012).
24. Erhart M, Ottova V, Gaspar T, *et al.* Measuring mental health and well-being of school-children in 15 European countries using the KIDSCREEN-10 Index. *Int J Public Health* 2009, 54 Suppl 2:160-6.
25. Martinez-Gomez D, Martinez-De-Haro V, Del-Campo J, *et al.* [Validity of four questionnaires to assess physical activity in Spanish adolescents]. *Gac Sanit* 2009, 23:512-7.
26. Cole TJ, Bellizzi MC, Flegal KM, *et al.* Establishing a standard definition for child overweight and obesity worldwide: international survey. *BMJ* 2000, 320:1240-3.

- 1  
2  
3 27. Currie C, Molcho M, Boyce W, *et al.* Researching health inequalities in adolescents: the  
4 development of the Health Behaviour in School-Aged Children (HBSC) family affluence  
5 scale. *Soc Sci Med* 2008, 66:1429-36.  
6  
7  
8  
9  
10 28. Greenland S. Dose-response and trend analysis in epidemiology: alternatives to  
11 categorical analysis. *Epidemiology* 1995, 6:356-65.  
12  
13  
14 29. Iannotti RJ, Janssen I, Haug E, *et al.* Interrelationships of adolescent physical activity,  
15 screen-based sedentary behaviour, and social and psychological health. *Int J Public*  
16 *Health* 2009, 54 Suppl 2:191-8.  
17  
18  
19  
20  
21 30. Hamer M, Stamatakis E, Steptoe A. Dose-response relationship between physical activity  
22 and mental health: the Scottish Health Survey. *Br J Sports Med* 2009, 43:1111-4.  
23  
24  
25  
26  
27 31. Leblanc AG, Janssen I. Dose-response relationship between physical activity and  
28 dyslipidemia in youth. *Can J Cardiol* 2010, 26:201-5.  
29  
30  
31  
32 32. Mark AE, Janssen I. Dose-response relation between physical activity and blood pressure  
33 in youth. *Med Sci Sports Exerc* 2008, 40:1007-12.  
34  
35  
36  
37 33. Mavaddat N, Kinmonth AL, Sanderson S, *et al.* What determines Self-Rated Health  
38 (SRH)? A cross-sectional study of SF-36 health domains in the EPIC-Norfolk cohort. *J*  
39 *Epidemiol Community Health* 2011, 65:800-6.  
40  
41  
42  
43 34. Ravens-Sieberer U, Erhart M, Torsheim T, *et al.* An international scoring system for self-  
44 reported health complaints in adolescents. *Eur J Public Health* 2008, 18:294-9.  
45  
46  
47  
48 35. Galan I, Meseguer CM, Herruzo R, *et al.* Self-rated health according to amount, intensity  
49 and duration of leisure time physical activity. *Prev Med* 2010, 51:378-83.  
50  
51  
52  
53 36. Lee IM. Dose-response relation between physical activity and fitness: even a little is  
54 good; more is better. *JAMA* 2007; 297, 2137-9.  
55  
56  
57  
58  
59  
60

- 1  
2  
3 37. Van Der HK, Paw MJ, Twisk JW, *et al.* A brief review on correlates of physical activity  
4 and sedentariness in youth. *Med Sci Sports Exerc* 2007, 39:1241-50.  
5  
6  
7  
8 38. Ministry of Health, Social Services and Equality, 2012. National Health Survey 2006.  
9  
10 <http://www.msps.es/estadEstudios/estadisticas/encuestaNacional/encuesta2006.htm>  
11  
12 (accessed Dec 2012).  
13  
14  
15 39. Boardman JD. Self-rated health among U.S. adolescents. *J Adolesc Health* 2006, 38:401-  
16  
17 8.  
18  
19  
20 40. Fosse NE, Haas SA. Validity and stability of self-reported health among adolescents in a  
21  
22 longitudinal, nationally representative survey. *Pediatrics* 2009, 123:e496-e501.  
23  
24  
25 41. Galán I, Gandarillas A, Febrel C, *et al.* [Validation of self-reported weight and height in  
26  
27 an adolescent population]. *Gac Sanit* 2001, 15:490-7.  
28  
29  
30 42. Galán I, Meseguer CM, León CM, *et al.* Validity of adolescent self-reported smoking  
31  
32 [Validez de la medición del consumo de tabaco autodeclarado en población juvenil]. *Gac*  
33  
34 *Sanit* 2000, 14 Suppl 2: 85.  
35  
36  
37  
38  
39  
40  
41  
42  
43  
44  
45  
46  
47  
48  
49  
50  
51  
52  
53  
54  
55  
56  
57  
58  
59  
60

Table 1. Description of the sample and distribution of optimal self-rated health, less health complaints, high satisfaction with life and health-related quality of life, according to individual variables. Spanish adolescents aged 11–18 years, 2006.

|                                     |                       | Optimal Self-reported health<br>N (17467) | Less health complaints<br>N (16803) | High satisfaction with life<br>N (17358) | Health-related quality of life<br>N (16560) |
|-------------------------------------|-----------------------|-------------------------------------------|-------------------------------------|------------------------------------------|---------------------------------------------|
|                                     |                       | %                                         | %                                   | %                                        | Mean                                        |
| MVPA                                | Global                | 91.1                                      | 67.4                                | 90.9                                     | 47.1                                        |
|                                     | Never                 | 80.1*                                     | 54.1*                               | 82.3*                                    | 42.6*                                       |
|                                     | 1-2 days              | 87.5                                      | 62.8                                | 87.4                                     | 44.3                                        |
|                                     | 3-4 days              | 90.8                                      | 66.3                                | 91.3                                     | 46.2                                        |
|                                     | 5-6 days              | 94.8                                      | 72.8                                | 93.1                                     | 48.2                                        |
| Sex                                 | 7 days                | 95.9                                      | 74.1                                | 95.2                                     | 52.5                                        |
|                                     | Men                   | 93.3*                                     | 76.7*                               | 91.9*                                    | 48.3*                                       |
| Age                                 | Women                 | 89.3                                      | 59.5                                | 90.0                                     | 46.1                                        |
|                                     | 10-12                 | 95.8*                                     | 68.6                                | 94.9*                                    | 52.5*                                       |
|                                     | 13-16                 | 90.1                                      | 67.6                                | 89.8                                     | 45.6                                        |
| Born in Spain                       | 17-18                 | 86.8                                      | 65.1                                | 87.7                                     | 43.2                                        |
|                                     | Yes                   | 91.1                                      | 67.7*                               | 91.2*                                    | 47.2                                        |
|                                     | No                    | 91.2                                      | 62.9                                | 85.3                                     | 45.7                                        |
| Smoking                             | Non-smoker            | 94.5*                                     | 70.6*                               | 94.0*                                    | 49.3*                                       |
|                                     | Smoker                | 80.9                                      | 56.6                                | 83.7                                     | 42.8                                        |
|                                     | Ex-smoker             | 89.2                                      | 66.6                                | 86.9                                     | 44.1                                        |
| Consumption of alcohol              | Never                 | 95.4*                                     | 70.4*                               | 94.3*                                    | 50.7*                                       |
|                                     | Rarely                | 89.9                                      | 65.2                                | 88.9                                     | 45.4                                        |
|                                     | Monthly               | 88.1                                      | 66.3                                | 87.2                                     | 43.5                                        |
|                                     | Weekly or daily       | 85.2                                      | 64.2                                | 87.9                                     | 43.9                                        |
| Body-mass index                     | Normal or underweight | 92.5*                                     | 68.2*                               | 91.5*                                    | 47.0                                        |
|                                     | Overweight            | 86.7                                      | 67.6                                | 90.3                                     | 47.1                                        |
|                                     | Obese                 | 77.4                                      | 58.0                                | 83.0                                     | 46.6                                        |
|                                     | NR                    | 90.4                                      | 64.6                                | 89.4                                     | 47.2                                        |
| Consumption of fruit and vegetables | Quartile 1            | 88.2*                                     | 64.1*                               | 88.8*                                    | 45.8*                                       |
|                                     | Quartile 2            | 91.5                                      | 67.5                                | 91.5                                     | 46.5                                        |
|                                     | Quartile 3            | 92.5                                      | 69.7                                | 92.2                                     | 47.2                                        |
|                                     | Quartile 4            | 92.6                                      | 68.5                                | 91.2                                     | 48.7                                        |
| Breakfast during the week           | Every day             | 93.2*                                     | 70.4*                               | 92.6*                                    | 48.1*                                       |
|                                     | Not every day         | 85.5                                      | 59.1                                | 86.1                                     | 44.3                                        |
| Time spent TV and computers         | Quartile 1            | 91.1                                      | 68.7*                               | 91.5*                                    | 48.0*                                       |
|                                     | Quartile 2            | 91.1                                      | 69.4                                | 91.8                                     | 47.0                                        |
|                                     | Quartile 3            | 91.7                                      | 68.8                                | 91.5                                     | 47.0                                        |
|                                     | Quartile 4            | 90.2                                      | 62.8                                | 88.7                                     | 46.2                                        |
|                                     | NR                    | 92.6                                      | 65.4                                | 89.3                                     | 48.6                                        |
| Time spent studying/ homework       | Quartile 1            | 89.3*                                     | 68.8*                               | 87.1*                                    | 46.3*                                       |
|                                     | Quartile 2            | 92.2                                      | 69.3                                | 91.9                                     | 47.9                                        |
|                                     | Quartile 3            | 92.4                                      | 68.8                                | 92.5                                     | 47.7                                        |
|                                     | Quartile 4            | 90.5                                      | 62.9                                | 91.5                                     | 46.3                                        |
|                                     | NR                    | 89.4                                      | 69.3                                | 88.6                                     | 48.4                                        |
| Academic achievement                | Very good             | 96.3*                                     | 71.8*                               | 96.4*                                    | 52.4*                                       |
|                                     | Good                  | 94.0                                      | 69.7                                | 94.2                                     | 48.2                                        |
|                                     | Average               | 87.4                                      | 65.3                                | 87.3                                     | 44.2                                        |
|                                     | Low                   | 79.7                                      | 54.0                                | 75.3                                     | 41.7                                        |

\*  $p < 0.05$

MVPA: Moderate-to-Vigorous Physical Activity

NR: Non-response

Table 2. Description of the sample and distribution of optimal self-rated health, less health complaints, high satisfaction with life and health-related quality of life, according to family variables. Spanish adolescents aged 11–18 years, 2006.

|                                                       | Optimal Self-reported health<br>N (17467) | Less health complaints<br>N (16803) | High satisfaction with life<br>N (17358) | Health-related quality of life<br>N (16560) |
|-------------------------------------------------------|-------------------------------------------|-------------------------------------|------------------------------------------|---------------------------------------------|
|                                                       | %                                         | %                                   | %                                        | Mean                                        |
| Employment situation of father                        |                                           |                                     |                                          |                                             |
| Paid employment                                       | 91.5*                                     | 67.8*                               | 91.3*                                    | 47.2*                                       |
| No paid employment                                    | 86.9                                      | 63.0                                | 85.4                                     | 45.4                                        |
| Don't know                                            | 90.3                                      | 52.9                                | 91.5                                     | 43.3                                        |
| No father                                             | 85.4                                      | 59.8                                | 82.0                                     | 44.3                                        |
| Employment situation of mother                        |                                           |                                     |                                          |                                             |
| Paid employment                                       | 91.0                                      | 67.1                                | 90.8*                                    | 47.1*                                       |
| No paid employment                                    | 91.5                                      | 68.3                                | 91.4                                     | 47.0                                        |
| Don't know                                            | 90.9                                      | 59.1                                | 91.4                                     | 47.5                                        |
| No mother                                             | 83.7                                      | 58.7                                | 78.0                                     | 45.2                                        |
| Socioeconomic status                                  |                                           |                                     |                                          |                                             |
| Low                                                   | 86.2*                                     | 62.6*                               | 84.5*                                    | 45.2*                                       |
| Average                                               | 91.2                                      | 66.7                                | 90.9                                     | 46.9                                        |
| High                                                  | 92.9                                      | 69.9                                | 93.2                                     | 48.0                                        |
| Country of birth of father                            |                                           |                                     |                                          |                                             |
| Spain                                                 | 91.1                                      | 67.6                                | 91.2*                                    | 47.1                                        |
| Other countries                                       | 91.1                                      | 64.7                                | 86.2                                     | 46.4                                        |
| Country of birth of mother                            |                                           |                                     |                                          |                                             |
| Spain                                                 | 91.1                                      | 67.7*                               | 91.1*                                    | 47.1                                        |
| Other countries                                       | 91.9                                      | 62.4                                | 87.3                                     | 46.1                                        |
| Type of household                                     |                                           |                                     |                                          |                                             |
| Both parents                                          | 92.0*                                     | 68.4*                               | 91.9*                                    | 47.3*                                       |
| Single parent                                         | 86.9                                      | 62.2                                | 85.0                                     | 45.7                                        |
| Blended                                               | 83.0                                      | 59.3                                | 82.6                                     | 44.2                                        |
| Others                                                | 85.3                                      | 61.3                                | 86.8                                     | 46.8                                        |
| Number of adults in the household                     |                                           |                                     |                                          |                                             |
| 2                                                     | 91.7*                                     | 64.1*                               | 91.2*                                    | 47.3                                        |
| 0,1,3,4,5                                             | 88.8                                      | 68.3                                | 89.3                                     | 46.4                                        |
| Number of minors in the household                     |                                           |                                     |                                          |                                             |
| 1,2,3                                                 | 91.1                                      | 60.3*                               | 91.0                                     | 47.1                                        |
| >3                                                    | 90.6                                      | 68.0                                | 88.8                                     | 46.8                                        |
| Satisfaction: family relationships <sup>a</sup>       |                                           |                                     |                                          |                                             |
| Good                                                  | 93.0*                                     | 45.2*                               | 94.2*                                    | 48.0*                                       |
| Fair-bad                                              | 75.9                                      | 70.1                                | 64.2                                     | 39.4                                        |
| Satisfaction: relationships with friends <sup>a</sup> |                                           |                                     |                                          |                                             |
| Good                                                  | 92.0*                                     | 48.5*                               | 92.3*                                    | 47.5*                                       |
| Fair-bad                                              | 77.1                                      | 68.6                                | 68.5                                     | 40.0                                        |

\*  $p < 0.05$

<sup>a</sup> Good: score 7-10; Fair-bad: score 0-6



Table 3. Logistic models. Association between the amount of moderate-to-vigorous physical activity and optimal self-rated health, less health complaints and high satisfaction with life. Spanish adolescents aged 11–18 years, 2006.

|                                    | Men                 |        | Women               |        |  |
|------------------------------------|---------------------|--------|---------------------|--------|--|
|                                    | OR* (95% CI)        | P      | OR* (95% CI)        | P      |  |
| <b>Optimal self-rated health</b>   |                     |        |                     |        |  |
| Frequency of undertaking MVPA      |                     |        |                     |        |  |
| Never                              | 1 (ref)             |        | 1 (ref)             |        |  |
| 1-2 days                           | 2.37 (1.56 to 3.58) | <0.001 | 1.20 (0.85 to 1.69) | 0.282  |  |
| 3-4 days                           | 2.34 (1.44 to 3.81) | 0.001  | 1.51 (1.06 to 2.14) | 0.020  |  |
| 5-6 days                           | 4.60 (2.60 to 8.13) | <0.001 | 2.28 (1.47 to 3.52) | <0.001 |  |
| 7 days                             | 4.05 (2.38 to 6.89) | <0.001 | 2.14 (1.37 to 3.34) | 0.001  |  |
| Linear trend P-value               | <0.001              |        | <0.001              |        |  |
| Quadratic trend P-value            | 0.325               |        | 0.850               |        |  |
| <b>Less health complaints</b>      |                     |        |                     |        |  |
| Frequency of undertaking MVPA      |                     |        |                     |        |  |
| Never                              | 1 (ref)             |        | 1 (ref)             |        |  |
| 1-2 days                           | 1.66 (1.14 to 2.42) | 0.008  | 1.16 (0.90 to 1.49) | 0.226  |  |
| 3-4 days                           | 1.65 (1.14 to 2.39) | 0.007  | 1.21 (0.93 to 1.58) | 0.143  |  |
| 5-6 days                           | 2.09 (1.47 to 2.96) | <0.001 | 1.46 (1.10 to 1.93) | 0.009  |  |
| 7 days                             | 1.94 (1.38 to 2.73) | <0.001 | 1.32 (0.97 to 1.80) | 0.076  |  |
| Linear trend P-value               | 0.001               |        | 0.021               |        |  |
| Quadratic trend P-value            | 0.216               |        | 0.463               |        |  |
| <b>High satisfaction with life</b> |                     |        |                     |        |  |
| Frequency of undertaking MVPA      |                     |        |                     |        |  |
| Never                              | 1 (ref)             |        | 1 (ref)             |        |  |
| 1-2 days                           | 1.99 (1.20 to 3.31) | 0.007  | 0.93 (0.63 to 1.36) | 0.722  |  |
| 3-4 days                           | 1.52 (0.90 to 2.55) | 0.111  | 1.44 (0.99 to 2.10) | 0.056  |  |
| 5-6 days                           | 2.02 (1.17 to 3.49) | 0.011  | 1.56 (0.98 to 2.49) | 0.059  |  |
| 7 days                             | 1.94 (1.09 to 3.44) | 0.023  | 2.00 (1.19 to 3.35) | 0.008  |  |
| Linear trend P-value               | 0.128               |        | <0.001              |        |  |
| Quadratic trend P-value            | 0.661               |        | 0.975               |        |  |

\* Adjusted for age, country of birth, smoking, alcohol consumption, BMI, consumption of fruit and vegetables, daily breakfast, time spent watching TV using computers, time spent studying, academic achievement, employment situation of the father and mother, socioeconomic status, country of birth of the father and mother, type of household, number of adults and number of minors in the household, satisfaction with family relationships and with friends.

Table 4. Linear models. Association between the amount of moderate-to-vigorous physical activity and health-related quality of life. Spanish adolescents aged 11–18 years, 2006.

|                               | Men                 |        | Women                 |        |
|-------------------------------|---------------------|--------|-----------------------|--------|
|                               | $\beta$ * (95% CI)  | P      | $\beta$ * (95% CI)    | P      |
| Frequency of undertaking MVPA |                     |        |                       |        |
| Never                         | 0 (ref)             |        | 0 (ref)               |        |
| 1-2 days                      | 1.61 (0.29 to 2.93) | 0.017  | 0.19 (- 0.71 to 1.10) | 0.676  |
| 3-4 days                      | 1.87 (0.50 to 3.24) | 0.007  | 1.19 (0.37 to 2.02)   | 0.005  |
| 5-6 days                      | 3.03 (1.74 to 4.31) | <0.001 | 2.79 (1.76 to 3.82)   | <0.001 |
| 7 days                        | 5.08 (3.73 to 6.43) | <0.001 | 5.09 (3.86 to 6.32)   | <0.001 |
| Linear trend P-value          | <0.001              |        | <0.001                |        |
| Quadratic trend P-value       | 0.006               |        | <0.001                |        |

\* Adjusted for age, country of birth, smoking, alcohol consumption, BMI, consumption of fruit and vegetables, daily breakfast, time spent watching TV and using computers, time spent studying, academic achievement, employment situation of the father and mother, socioeconomic status, country of birth of the father and mother, type of household, number of adults and number of minors in the household, satisfaction with family relationships and with friends.

1  
2  
3 Figure 1. Dose-response relationship of the amount of self-reported Moderate-to-  
4 Vigorous Physical Activity (MVPA) with optimal self-rated health, less health  
5 complaints, high satisfaction with life, and health-related quality of life among Spanish  
6 adolescents aged 11–18 years.  
7  
8  
9

10  
11 *Footnote:*

12 Curves represent adjusted odds ratios or mean differences (solid lines) and their 95%  
13 confidence intervals (dashed lines) based on restricted quadratic splines for the amount  
14 of MVPA with knots at 1, 3.5, and 6 days/week. The reference value (odds ratio = 1 and  
15 mean difference = 0) was set at 0 days/week of moderate-vigorous physical activity.  
16 Odds ratios and mean differences were obtained from logistic and linear regression  
17 models accounting for the complex survey and adjusted for personal and familial risk  
18 factors (see Methods). Bars represent the weighted bar charts of the amount of MVPA  
19 among men and women.  
20  
21  
22  
23  
24  
25  
26  
27  
28  
29  
30  
31  
32  
33  
34  
35  
36  
37  
38  
39  
40  
41  
42  
43  
44  
45  
46  
47  
48  
49  
50  
51  
52  
53  
54  
55  
56  
57  
58  
59  
60

1  
2  
3 **Physical activity and self-reported health status among adolescents: a cross-sectional**  
4 **population-based study**  
5  
6

7 **Galán I,<sup>1,2</sup> Boix R,<sup>1</sup> Medrano MJ,<sup>1</sup> Ramos P,<sup>3</sup> Rivera F,<sup>4</sup> Pastor-Barriuso R,<sup>1,5</sup> Moreno C<sup>3</sup>**  
8  
9

10  
11  
12 <sup>1</sup> *Centro Nacional de Epidemiología. Instituto de Salud Carlos III* [National Centre of  
13 Epidemiology, Carlos III Institute of Health], Madrid (Spain)  
14

15  
16 <sup>2</sup> *Departamento de Medicina Preventiva y Salud Pública. Facultad de Medicina.*  
17 *Universidad Autónoma de Madrid* [Department of Preventive Medicine and Public  
18 Health, Faculty of Medicine, Autonomous University of Madrid], Madrid (Spain)  
19

20  
21 <sup>3</sup> *Departamento de Psicología Evolutiva y de la Educación. Facultad de Psicología.*  
22 *Universidad de Sevilla* [Department of Developmental and Educational Psychology,  
23 Faculty of Psychology, University of Seville], Seville (Spain)  
24  
25

26  
27 <sup>4</sup> *Departamento de Psicología Clínica, Experimental y Social. Universidad de Huelva*  
28 [Department of Clinical, Experimental and Social Psychology, University of Huelva],  
29 Huelva (Spain)  
30  
31

32  
33 <sup>5</sup> Consortium for Biomedical Research in Epidemiology and Public Health  
34 (CIBERESP), Spain  
35  
36

37  
38  
39  
40  
41 **Keywords:** Physical activity, health status, adolescents  
42

43  
44 **Word count:**  
45

46  
47  
48 **Corresponding author:**  
49

50 Iñaki Galán

51 Centro Nacional de Epidemiología, Madrid (Spain)

52 c/ Monforte de Lemos 5. CP: 28029

53 Telephone: +34 918222679

54 Fax: +34 913877815

55 e-mail: [igalan@isciii.es](mailto:igalan@isciii.es)  
56  
57  
58  
59  
60

## Abstract

**Objectives:** Little is known about the dose-response relationship between physical activity and health benefits among young people. Our objective was to analyse the association between the frequency of undertaking Moderate-to-Vigorous Physical Activity (MVPA) and the self-reported health status of the adolescent population.

**Design:** Cross-sectional study.

**Setting:** All regions of Spain.

**Participants:** Students aged 11-18 years participating in the Spanish Health Behaviour in School-aged Children (HBSC) survey 2006. A total of 375 schools and 21,188 students were selected.

**Main outcomes:** The frequency of undertaking MVPA was measured by questionnaire, as were the following four health indicators: self-rated health, health complaints, satisfaction with life, and health-related quality of life. Linear and logistic regression models were used to analyse the association, adjusting for potential confounding variables and the modelling of the dose-response relationship.

**Results:** As the frequency of MVPA increased, the association with health benefits was stronger. A linear trend ( $p < 0.05$ ) was found for self-rated health and health complaints in males and females, and for satisfaction with life among females; for health-related quality of life, this relationship was quadratic for both sexes ( $p < 0.05$ ). For self-reported health and health complaints, the effect was found to be of greater magnitude in males than in females and, in all scales, the benefits were observed from the lowest frequencies of MVPA, especially in males.

**Conclusions:** A protective effect of MVPA was found in both sexes for the four health indicators studied, and this activity had a gradient effect. Among males, health benefits

1  
2  
3 were detected from very low levels of physical activity and the magnitude of the  
4  
5 relationship was greater than that for females.  
6  
7  
8  
9  
10  
11  
12  
13  
14  
15  
16  
17  
18  
19  
20  
21  
22  
23  
24  
25  
26  
27  
28  
29  
30  
31  
32  
33  
34  
35  
36  
37  
38  
39  
40  
41  
42  
43  
44  
45  
46  
47  
48  
49  
50  
51  
52  
53  
54  
55  
56  
57  
58  
59  
60

For peer review only

## Article summary

### Article focus

- Although it is recommended that all adolescents should undertake 60 minutes of daily Moderate-to-Vigorous Physical Activity (MVPA), little is known about the nature of the relationship in this population, and whether or not the effect varies depending on age and sex.
- We examined cross-sectional associations between the frequency of undertaking self-reported MVPA and the health status of the adolescent population, using subjective health scales that are considered to be useful tools especially in the stage of adolescence, when psychological aspects are so important in the feeling of well-being among young people.

### Key messages

- The protective effect of MVPA on health was detected from very low levels, below those established by current recommendations.
- A linear trend was found for self-rated health, health complaints and for satisfaction with life. For health-related quality of life the relationship was quadratic.
- The positive effect on health produced lower results in females than in males.

### Strengths and limitations of this study

- The main strength is the representativeness and large size of the sample. The methodology employed is the standard one for the HBSC study in which more than 40 Western countries have participated.
- A major limitation is the cross-sectional nature of the study. Moreover, the measurement of health status using subjective health scales and the estimation of MVPA are both based on self-reported information.

## INTRODUCTION

According to the World Health Organization (WHO)<sup>1</sup>, physical inactivity is the fourth most important risk factor affecting global mortality, to which nearly 6% of all deaths are attributed. In the adolescent population, short-term benefits related to Physical Activity (PA) are improvements in lipid profile, blood pressure, metabolic syndrome, muscular strength and bone density, together with a reduction in obesity and overweight levels, as well as a decrease in emotional problems and depressive symptoms.<sup>2-5</sup> Moreover, young people who undertake PA adopt healthy behaviour more easily and have better levels of academic achievement and cognitive functioning.<sup>4, 6-8</sup>

The dose-response relationship between physical activity and various health indicators has mainly been studied in the adult population,<sup>9-15</sup> where there is still a controversy about whether or not this relationship is linear.<sup>12,16</sup> Ekelund et al.,<sup>17</sup> in a pooled data analysis of 14 studies in children and adolescents, found a direct benefit between three tertiles of Moderate-to-Vigorous Physical Activity (MVPA) in relation to cardiometabolic outcomes. Although the WHO recommends that all children of 5-17 years of age take at least 60 minutes of daily MVPA,<sup>18</sup> little is known about the nature of the relationship in this population. Therefore, finding out the effect on health of several levels of PA could have important implications for improving the recommendations regarding this activity.

It should be emphasized that concepts underlying health status in children and adolescents differ from those for adults. As young people are still developing, the measurement of health status must be approached from a global and comprehensive perspective for each individual. Concepts such as 'subjective health' and 'health-related quality of life' cover complex physical, emotional, mental and social aspects.<sup>19,20</sup> Hence,



1  
2  
3 it is important to evaluate if the effect of the PA is distributed in a distinct way for the  
4  
5 different dimensions of health status.  
6

7  
8 Finally, although PA varies considerably depending on age and sex,<sup>21</sup> to our knowledge  
9  
10 there have been very few studies in the literature about the role that these variables play  
11  
12 regarding the effect of PA on health.<sup>4</sup>  
13

14  
15 The objective of this study was to analyse the association between the frequency of  
16  
17 undertaking MVPA and the different dimensions of adolescent health status, assessing if  
18  
19 this relationship differs according to age and sex.  
20  
21

## 22 23 24 25 **METHODS**

### 26 27 **Study population**

28  
29  
30 The source of information was the Health Behaviour in School-aged Children (HBSC)  
31  
32 study carried out in 2006.<sup>22</sup> The population was a representative sample of  
33  
34 preadolescents and adolescents, with an age range of 11-18 years, resident in Spain and  
35  
36 enrolled in school from the 5th year of primary school to the last year of upper  
37  
38 secondary school (2nd year of baccalaureate). A multistage stratified random sampling  
39  
40 was used, taking into account age strata (4 groups), region (17 autonomous  
41  
42 communities), school site (rural and urban), and type of school (public and private).  
43  
44 Initially, 480 schools were contacted of which 377 (103 private and 274 public schools)  
45  
46 agreed to participate in the study, which represented a response rate of 78.5%. **On**  
47  
48 **average, three classes were selected in each school.** A total of 22,350 questionnaires  
49  
50 were collected, although subsequently 539 were excluded because of non-response to  
51  
52 questions about sex and age, or lack of response to more than 50% of the questionnaire.  
53  
54  
55  
56  
57 The sample size was 21,811 participants. The study was carried out in spring 2006.  
58  
59  
60

1  
2  
3 Previously trained survey technicians visited the selected schools, where the students  
4  
5 completed an anonymous questionnaire during normal school hours.  
6  
7

8 This study was approved by the Institutional Review Board of the Carlos III Institute of  
9  
10 Health .  
11

### 12 Study variables

13  
14 Health status was measured using four indicators: 1) self-rated health was measured using  
15  
16 the question “*Would you say that your health is: excellent, good, fair or bad*”. Optimal  
17  
18 health status was categorized by a response of excellent or good, and sub-optimal health  
19  
20 status was categorized by a response of fair or bad. 2) The health complaints indicator  
21  
22 was assessed using a scale based on the HBSC-Symptom Checklist, which is a list of  
23  
24 eight physical and psychological symptoms (headaches, abdominal pain, backache,  
25  
26 feeling low, irritability, nervousness, sleeping difficulties and dizziness), to estimate their  
27  
28 frequency during the last six months. Having 2 or more symptoms with a frequency of  
29  
30 several times a week or daily was considered to define having noticeable subjective  
31  
32 health complaints.<sup>19</sup> 3) Satisfaction with life was estimated using the Cantril Ladder,<sup>23</sup> in  
33  
34 which, using a scale from 0 to 10, the participant was asked “*on which rung of the ladder*  
35  
36 *(scale from 0 to 10) do you feel you stand at this moment in your life?*”, with 0 being the  
37  
38 worst score and 10 the best. A score of 0 to 5 was categorized as dissatisfied, whereas a  
39  
40 score of 6 to 10 was categorized as satisfied.<sup>19</sup> 4) Health-related quality of life was  
41  
42 measured using the Kidscreen-10 index,<sup>24</sup> a series of 10 questions about mood, ability to  
43  
44 concentrate, energy, vitality, well-being, ability to have fun with friends. Each question  
45  
46 has five categories of response ranging from “never” to “always” or from “not at all” to  
47  
48 “extremely often”. The items fulfil the assumptions of the Rasch model. To make the  
49  
50 interpretation more applicable, the scores of the Rasch scales are translated into T-values  
51  
52  
53  
54  
55  
56  
57  
58  
59  
60

with scale means of 50 and standard deviation of 10, with higher values indicating higher health-related quality of life.<sup>24</sup>

The frequency of MVPA was measured using the question: “*in the last seven days, considering moderate and vigorous activity... On how many days did you feel you were physically active for a total of 60 minutes per day?*” The response categories were from 0 to 7 days. This question, when compared with PA assessed by accelerometers in Spanish adolescents, has shown an acceptable validation (Spearman correlation=0.43).<sup>25</sup>

The following factors were considered as potentially confounding variables for the association between health status and frequency of MVPA: 1) personal variables (sex, age, country of birth, current smoker, alcohol consumption, body-mass index –calculated as the ratio of weight in kg/height in m<sup>2</sup> from self-reported weight and height, and defining overweight and obesity using the cut-off points proposed by Cole et al.,<sup>26</sup> consumption of fruit and vegetables, daily breakfast, number of hours each day spent watching television and using computers or game consoles, number of hours each day spent doing school homework); 2) family variables (employment status of the father, employment status of the mother, family purchasing power –measured by the Family Affluence Scale,<sup>27</sup> an index estimated by four items: number of times that the adolescents have been on holiday with their family in the last 12 months; does the family own a car or van; does the student have his/her own bedroom; number of computers owned by the family-, country of birth of the father, country of birth of the mother, type of household – both parents, single parent, blended family–, number of minors in the household, number of adults in the household); and 3) relationships with the school, the family and friends (academic achievement, satisfaction with family relationships, satisfaction with relationships with friends). The variables are categorized in Table 1.

### Data analysis

1  
2  
3 The questionnaires with missing values were excluded from data analysis, so that the  
4 number of subjects studied was 17,467 for self-rated health; 17,358 for satisfaction with  
5 life; 16,803 for health complaints; and 16,560 for health-related quality of life. The  
6  
7 sample excluding missing values was similar to the original (there was no statistically  
8 significant difference), comparing the main socioeconomic variables, health status, and  
9 the frequency of undertaking MVPA.  
10  
11  
12  
13  
14  
15

16 The complex sampling design was taken into account during analysis by using the  
17 “Survey Data” module of the statistical package Stata v11. Standard errors were  
18 computed by using the linearized variance estimator based on a first-order Taylor series.  
19  
20 Prevalence was calculated for optimal self-rated health, low level of health complaints,  
21 high satisfaction with life, and the means for the scores on the scale for health-related  
22 quality of life, with 95% confidence intervals, both global and for the categories of each  
23 one of the exposure variables.  
24  
25  
26  
27  
28  
29  
30  
31

32 Regression models were used, logistic ones for the estimation of the odds ratio of  
33 prevalence (OR) and linear ones for the calculation of the regression coefficients,  
34 adjusting for the potential confounding variables mentioned above. All co-variables were  
35 added simultaneously into the models. First, we calculated the association between the  
36 frequency of undertaking MVPA and health status by estimating OR for the following  
37 categories: 1-2 days, 3-4 days, 5-6 days, and 7 days, using ‘never’ as the reference.  
38  
39 Second, linear and quadratic trends of the association between MVPA and the health  
40 indicators were calculated from the regression models. For the linear trend, the average  
41 value for each category was used modelling it as a continuous variable, while for the  
42 quadratic trend the square of these values was used. Statistical significance was set at  
43  
44  
45  
46  
47  
48  
49  
50  
51  
52  
53  
54  
55  
56  
57  
58  
59  
60  
p<0.05.

1  
2  
3 To further explore the relationships between MVPA and health status indicators without  
4 imposing any particular functional form for the dose-response trends, the amount of  
5 moderate-to-vigorous physical activity was entered in regression models using restricted  
6 quadratic splines with knots at 1, 3.5, and 6 days/week.<sup>28</sup> Restricted quadratic splines  
7 allow for different quadratic trends within each intermediate category and linear trends in  
8 boundary categories, and hence they can accommodate a wide variety of smooth dose-  
9 response curves, while avoiding implausible shapes at the tails of the exposure  
10 distribution.  
11  
12  
13  
14  
15  
16  
17  
18  
19

20  
21 Interactions between MVPA, age and sex were evaluated. Given that interactions were  
22 found in the relationship between the frequency of MVPA and health status according to  
23 sex, the results are shown separately for males and females.  
24  
25  
26  
27  
28  
29

## 30 31 **RESULTS**

32  
33 Table 1 describes the health status of the questionnaire respondents, as estimated by the  
34 four health indicators. A total of 91.1% (CI 95%: 90.3-92.0) declared they had an  
35 optimal self-rated health, 67.4% (CI 95%: 66.1-68.5) had a low level of health  
36 complaints and 90.9% (CI 95%: 90.1-91.6) reported a high satisfaction with life. The  
37 mean score on the scale for health-related quality of life was 47.1 (CI 95%: 46.5- 47.6).  
38  
39  
40  
41  
42  
43  
44

45 According to all the indicators used, the level of health was better, in a statistically  
46 significant way, for the questionnaire respondents who indicated that they undertook  
47 MVPA more frequently, with gradual increases depending on the categories of MVPA  
48 (Table 1). **The rest of potentially confounding variables considered, were also associated**  
49 **with self-rated health, less health complaints, high satisfaction with life and health-**  
50 **related quality of life (Tables 1 and 2).**  
51  
52  
53  
54  
55  
56  
57  
58  
59  
60

1  
2  
3 No statistically significant interactions were found between MVPA and age, whereas  
4  
5 statistical significance was reached between MVPA and sex for the indicators self-rated  
6  
7 health and satisfaction with life.  
8  
9

10 Tables 3 and 4 and Figure 1 show the results of the multivariate analysis that evaluated, for  
11  
12 each sex separately, the association of the frequency of undertaking MVPA with the  
13  
14 different indicators of health status, controlling the effect on this association of personal and  
15  
16 family factors. For both boys and girls, there was a positive, graded and statistically  
17  
18 significant association (linear trend,  $p < 0.001$ ) between MVPA and self-rated health (Table  
19  
20 3), with odds ratios (OR) that ranged in males from 2.37, for those who undertook MVPA  
21  
22 on 1-2 days, to 4.60 and 4.05, for those undertaking it on 5-6 and 7 days, respectively.  
23  
24 Moving from less than 5 days to 5-6 days of MVPA, the OR increased from 2.34 to 4.60. In  
25  
26 females, although a positive association was also found, the magnitude of the benefits on  
27  
28 self-reported health was lower, with values that were half those for the males (OR= 2.14, if  
29  
30 MPVA undertaken 7 days).  
31  
32  
33

34  
35 Regarding less health complaints (Table 3), an increase in the positive effects was seen in  
36  
37 males from small amounts of MVPA on 1-2 days (OR=1.66,  $p=0.008$ ), which increased  
38  
39 further to an OR of nearly 2 for MVPA on 5-6 days. In females, this effect was lower,  
40  
41 reaching statistical significance after MVPA on 5-6 days with an OR of 1.46 ( $p=0.009$ ). The  
42  
43 linear trend p-value was statistically significant ( $p < 0.001$ ) in both males and females.  
44  
45

46 The degree of satisfaction with life (Table 3) was also shown to be significantly associated  
47  
48 with the frequency of undertaking MVPA; among the boys the OR for high satisfaction  
49  
50 increased to 1.99 if physical activity was undertaken on 1-2 days per week, and satisfaction  
51  
52 remained at these values for frequencies of more than 5 days of MVPA. In girls, the  
53  
54 magnitude of the effect was similar, but the gradient was steeper. The linear trend p-value  
55  
56 was statistically significant for females ( $p < 0.001$ ), but not for males.  
57  
58  
59  
60

1  
2  
3 Table 4 shows the same analysis applied to health-related quality of life, considering it  
4 as a continuous variable and using linear regression to analyse it. In males, an increasing  
5 dose-response effect was seen, especially noticeable after 5-days per week of MVPA  
6 ( $\beta=3.03$ ), which increased even further, to 5.08, for those undertaking MVPA for 7-days  
7 per week. In females, the benefits were lower at low levels of frequency of MVPA, but  
8 reached the same magnitude from 5 days of MVPA. Overall, this indicator was the one  
9 that showed fewer differences between boys and girls, as can be seen in Figure 1. The  
10 quadratic trend p-value was statistically significant in males ( $p=0.006$ ) and females  
11 ( $p<0.001$ ).

## 22 23 24 25 26 **DISCUSSION**

### 27 28 **Principal findings**

29  
30 The results of this study clearly show the benefits of undertaking physical activity on the  
31 health status of adolescents enrolled in schools in Spain. The following results should be  
32 highlighted: 1) the magnitude of the effect, with benefits for optimal health reaching OR  
33 higher than 4 for males who undertook MVPA daily or on most days, as compared to  
34 those who never undertook it; 2) the existence of a dose-response effect, with the  
35 positive effects increasing in accordance with the increase in the frequency of MVPA; 3)  
36 the consistency of the results with the association present for the four health indicators in  
37 both sexes; and 4) the greater positive effect in males, especially at low levels of  
38 frequency of MVPA.

39  
40 Few studies have linked the effect of MPVA on general indicators of health status in  
41 adolescents. Using data from the HBSC study for adolescents from North America,  
42 Western Europe, Eastern Europe, Northern Europe and Southern Europe, Iannotti et al.<sup>29</sup>  
43  
44  
45  
46  
47  
48  
49  
50  
51  
52  
53  
54  
55  
56  
57  
58  
59  
60

1  
2  
3 evaluated the relationship between the frequency of PA and self-rated health, health  
4 complaints and satisfaction with life and found, as in our study, beneficial effects for all  
5 three indicators.  
6  
7  
8

### 9 10 **Dose-response relationship**

11  
12 The dose-response relationship between PA and health implies that increases in PA are  
13 related with additional improvements in health status, even when it is not undertaken  
14 very frequently. This has also been found in other studies regarding dyslipidemia, blood  
15 pressure, overweight and obesity, metabolic syndrome and mental health.<sup>4,30-32</sup> However,  
16 to our knowledge, there are no comparable studies that measure the nature of the  
17 relationship on general indicators of health status. Indeed, there is a controversy about  
18 whether this relationship is linear or curvilinear, as some studies have found linear  
19 patterns, whereas others have not,<sup>4,30-32</sup> probably because the patterns can be different  
20 depending upon the health effect that is being assessed. In our study, a curvilinear  
21 relationship was found with a slight slowdown in the health benefits beyond 3-4 days of  
22 MVPA in the following indicators: self-rated health; health complaints; and satisfaction  
23 with life. In contrast, for health-related quality of life in both sexes, the benefits  
24 increased from these intermediate levels of MVPA. These differences in the dose-  
25 response relationship suggest that the effect varies depending upon the different  
26 dimensions of health status to which the indicators are related. Although self-rated  
27 health has been proposed as a measurement of the summary effect of multiple  
28 dimensions of health, it is more closely related to the physical dimension rather than the  
29 mental and social ones.<sup>33</sup> Similarly, the scale for health complaints is related to  
30 symptoms with psychosomatic components very frequently associated with  
31 adolescence.<sup>34</sup> Yet, the scale for the quality of life, besides including such physical and  
32 mental dimensions, also incorporates family and social relationships, which could  
33  
34  
35  
36  
37  
38  
39  
40  
41  
42  
43  
44  
45  
46  
47  
48  
49  
50  
51  
52  
53  
54  
55  
56  
57  
58  
59  
60



1  
2  
3 suggest that these additional dimensions may be involved in the achieving of greater  
4  
5 health benefits with the maximum frequencies of MVPA.  
6

7  
8 It should be stressed that the benefits to health status are obtained from low levels of  
9  
10 **MVPA**, especially for boys. Similar results have been reported for self-rated health in a  
11  
12 young adult population<sup>35</sup> and regarding blood pressure and dyslipidemia in  
13  
14 adolescents.<sup>31,32</sup> This could have important implications for the preventive  
15  
16 recommendations, because (although 60 minutes of physical activity is currently  
17  
18 recommended, if possible on a daily basis) the fact that positive results of a moderate  
19  
20 magnitude can be achieved with very small amounts of MVPA **may** encourage the  
21  
22 participation of the more sedentary people. Nevertheless, the maximum benefits were  
23  
24 obtained according to public health recommendations, so the message should be: “even a  
25  
26 little is good; more is better”.<sup>36</sup>  
27  
28  
29

### 30 **Gender differences**

31  
32  
33 The results in health that are derived from undertaking MVPA are greater in males,  
34  
35 especially in self-rated health and, to a lesser extent, in having less health complaints.  
36  
37 According to our study, females need to undertake more days of MVPA to obtain  
38  
39 similar health benefits. However, the effect on satisfaction with life and health-related  
40  
41 quality of life was fairly similar in males and females. These differences suggest that the  
42  
43 variation of the effect of MVPA according to sex could also be associated to different  
44  
45 dimensions of health status. Previous reviews have clearly shown important differences  
46  
47 between males and females in the quantity, intensity and type of physical activity, and  
48  
49 that, in part, these distinctions could be explained by biological differences and those  
50  
51 relating to sociocultural environment and body image.<sup>21,37</sup> It would, therefore, be  
52  
53 interesting for subsequent studies to undertake detailed research about this relationship.  
54  
55  
56  
57

### 58 **Strengths and weaknesses**

1  
2  
3 To aid correct interpretation of these data, several limitations should be mentioned. First,  
4 the limitation in causal inference, stemming from the cross-sectional nature of the study,  
5 would theoretically affect the temporality of the association. That is, people who have  
6 health problems can have limitations in undertaking physical exercise. However, from  
7 the data of the National Health Survey of 2006,<sup>38</sup> only 1.7% of adolescents between 16  
8 and 19 years do not undertake the leisure time physical exercise that they would like to  
9 take because of health problems, hence, this figure would not affect the results obtained.

10  
11  
12  
13  
14  
15  
16  
17  
18 **Second, the measurement of health status, MVPA and several covariables of the study is**  
19 **based on self-reported information. Although it is difficult to anticipate the magnitude**  
20 **and direction of the bias induced by measurement error in self-reported physical activity**  
21 **without validity or reproducibility substudies, some degree of attenuation in the**  
22 **underlying trends would be expected if the misclassification of physical activity status**  
23 **was nondifferential with respect to health outcomes. Nevertheless, the measurement of**  
24 **health status using subjective health scales, as in this present study, has been validated in**  
25 **previous studies,<sup>20,23,24,39,40</sup> and such scales are considered to be useful tools especially in**  
26 **the stage of adolescence, when psychological aspects are so important in the feeling of**  
27 **well-being among young people. The variable used for estimating MVPA has been**  
28 **previously validated in an adolescent population of Spain, obtaining an acceptable level**  
29 **of validity when compared with measurement using accelerometers.<sup>25</sup> Other variables,**  
30 **such as self-reported BMI or tobacco consumption, have also been validated in Spain, by**  
31 **comparing them with objective measurements.<sup>41,42</sup> Third, it has not been possible to**  
32 **differentiate the effect of the intensity of physical activity, which is a dimension**  
33 **independently related with self-rated health.<sup>35</sup>**

34  
35  
36  
37  
38  
39  
40  
41  
42  
43  
44  
45  
46  
47  
48  
49  
50  
51  
52  
53  
54  
55  
56  
57  
58  
59  
60  
The main strengths of this study are the representativeness and large size of the sample used, which means that the results can be extrapolated accurately, and that the

1  
2  
3 methodology employed is the standard one for the HBSC study. This is a collaborative  
4 WHO study in which more than 40 Western countries (including Spain) have  
5 participated.  
6  
7  
8

## 9 10 **CONCLUSIONS**

11  
12 To sum up, an association was found between the frequency of undertaking self-reported  
13 MVPA and the health status of adolescents enrolled in schools in Spain. A linear trend  
14 was found for self-rated health, health complaints and for satisfaction with life. For  
15 health-related quality of life the relationship was quadratic. The benefits of MVPA on  
16 health were detected from very low levels, below those established by current  
17 recommendations. In general, the magnitude of association was lower in females than in  
18 males, a finding that needs to be explained by subsequent research.  
19  
20  
21  
22  
23  
24  
25  
26  
27  
28  
29  
30

31 **Acknowledgments:** We thank the teachers, principals and participants for their  
32 generous contribution to this study.  
33  
34

35  
36 **Contributors:** All authors were involved in the development of the design of the study.  
37 PR, FR and CM coordinated the field work and collected the data. IG, RB, MM and RP  
38 conducted the analyses. IG and RB prepared the first draft. All authors contributed to the  
39 interpretation of data and revision of the manuscript. All authors approved the final  
40 version.  
41  
42  
43  
44  
45  
46  
47

48 **Funding:** This study has been funded by the *Consejo Superior de Deportes* [National  
49 Sports Council] and the *Ministerio de Sanidad, Servicios Sociales e Igualdad* [Ministry  
50 of Health and Social Policy].  
51  
52  
53

54 **Competing interests:** None.  
55  
56  
57  
58  
59  
60

1  
2  
3 **Ethics approval:** This study was approved by the Institutional Review Board of the  
4  
5 Carlos III Institute of Health.  
6

7  
8 **Provenance and peer review:** Not commissioned; externally peer reviewed.  
9

10 **Data sharing statement:** Full results of the Spanish HBSC study are available at  
11  
12 <http://www.msps.es/profesionales/saludPublica/prevPromocion/promocion/saludJovenes>  
13  
14 [/estudioHBSC/nacional\\_hbsc.htm](http://www.msps.es/profesionales/saludPublica/prevPromocion/promocion/saludJovenes)  
15  
16  
17  
18  
19  
20  
21  
22  
23  
24  
25  
26  
27  
28  
29  
30  
31  
32  
33  
34  
35  
36  
37  
38  
39  
40  
41  
42  
43  
44  
45  
46  
47  
48  
49  
50  
51  
52  
53  
54  
55  
56  
57  
58  
59  
60

## REFERENCES

1. World Health Organization. Global Strategy on Diet, Physical Activity and Health.  
[http://www.who.int/dietphysicalactivity/strategy/eb11344/strategy\\_english\\_web.pdf](http://www.who.int/dietphysicalactivity/strategy/eb11344/strategy_english_web.pdf)  
(accessed Dec 2012).
2. Biddle SJ, Asare M. Physical activity and mental health in children and adolescents: a review of reviews. *Br J Sports Med* 2011, 45:886-95.
3. Hallal PC, Victora CG, Azevedo MR, *et al.* Adolescent physical activity and health: a systematic review. *Sports Med* 2006, 36:1019-30.
4. Janssen I, Leblanc AG. Systematic review of the health benefits of physical activity and fitness in school-aged children and youth. *Int J Behav Nutr Phys Act* 2010, 7:40.
5. Strong WB, Malina RM, Blimkie CJ, *et al.* Evidence based physical activity for school-age youth. *J Pediatr* 2005, 146:732-7.
6. Physical Activity Guidelines Advisory Committee report, 2008. To the Secretary of Health and Human Services. Part A: executive summary. *Nutr Rev* 2009, 67; 114-20.
7. Janssen I. Physical activity guidelines for children and youth. *Can J Public Health* 2007, 98 Suppl 2:109-21.
8. Fedewa A, Ahn S. The effects of physical activity and physical fitness on children's achievement and cognitive outcomes: a meta-analysis. *Res Q Exerc Sport* 2011, 82:521-35.
9. Abu-Omar K, Rutten A, Robine JM. Self-rated health and physical activity in the European Union. *Soz Praventivmed* 2004, 49:235-42.

- 1  
2  
3 10. Haennel RG, Lemire F. Physical activity to prevent cardiovascular disease. How much is  
4  
5 enough? *Can Fam Physician* 2002, 48:65-71.  
6  
7  
8 11. Kim K, Shin YJ, Nam JH, *et al.* A dose-response relationship between types of physical  
9  
10 activity and distress. *J Korean Med Sci* 2008, 23:218-25.  
11  
12  
13 12. Lee IM, Skerrett PJ. Physical activity and all-cause mortality: what is the dose-response  
14  
15 relation? *Med Sci Sports Exerc* 2001, 33 Suppl 6:459-71.  
16  
17  
18 13. Martin CK, Church TS, Thompson AM, *et al.* Exercise dose and quality of life: a  
19  
20 randomized controlled trial. *Arch Intern Med* 2009, 169:269-78.  
21  
22  
23 14. Mayer-Davis EJ, D'Agostino R, Jr., Karter AJ, *et al.* Intensity and amount of physical  
24  
25 activity in relation to insulin sensitivity: the Insulin Resistance Atherosclerosis Study.  
26  
27 *JAMA* 1998, 279:669-74.  
28  
29  
30 15. Ohkawara K, Tanaka S, Miyachi M, *et al.* A dose-response relation between aerobic  
31  
32 exercise and visceral fat reduction: systematic review of clinical trials. *Int J Obes (Lond)*  
33  
34 2007, 31:1786-97.  
35  
36  
37 16. Lollgen H, Bockenhoff A, Knapp G. Physical activity and all-cause mortality: an updated  
38  
39 meta-analysis with different intensity categories. *Int J Sports Med* 2009, 30:213-24.  
40  
41  
42 17. Ekelund U, Luan J, Sherar LB, *et al.* Moderate to vigorous physical activity and sedentary  
43  
44 time and cardiometabolic risk factors in children and adolescents. *JAMA* 2012, 307:704-  
45  
46 12.  
47  
48  
49 18. World Health Organization. Global recommendations on physical activity for health.  
50  
51 World Health Organization 2010.  
52  
53 [http://whqlibdoc.who.int/publications/2010/9789241599979\\_eng.pdf](http://whqlibdoc.who.int/publications/2010/9789241599979_eng.pdf) (accessed Feb  
54  
55 2013).  
56  
57  
58  
59  
60

- 1  
2  
3 19. Ravens-Sieberer U, Torsheim T, Hetland J, *et al.* Subjective health, symptom load and  
4 quality of life of children and adolescents in Europe. *Int J Public Health* 2009, 54 Suppl  
5 2:151-9.  
6  
7  
8  
9  
10 20. Ravens-Sieberer U, Erhart M, Wille N, *et al.* Generic health-related quality-of-life  
11 assessment in children and adolescents: methodological considerations.  
12 *Pharmacoeconomics* 2006, 24:1199-220.  
13  
14  
15  
16  
17 21. Sallis JF, Prochaska JJ, Taylor WC. A review of correlates of physical activity of children  
18 and adolescents. *Med Sci Sports Exerc* 2000, 32:963-75.  
19  
20  
21  
22 22. Currie C, Nic GS, Godeau E. The Health Behaviour in School-aged Children: WHO  
23 Collaborative Cross-National (HBSC) study: origins, concept, history and development  
24 1982-2008. *Int J Public Health* 2009, 54 Suppl 2:131-9.  
25  
26  
27  
28  
29 23. Curries, CE, Gabhainn, SN, Godeau, E. Inequalities in young people Health. HBSC  
30 International report from the 2005/2006 Survey. WHO Regional Office for Europe,  
31 Copenhagen, Denmark.  
32  
33  
34  
35  
36 [http://www.euro.who.int/\\_data/assets/pdf\\_file/0005/53852/E91416.pdf](http://www.euro.who.int/_data/assets/pdf_file/0005/53852/E91416.pdf) (accessed Dec  
37 2012).  
38  
39  
40  
41 24. Erhart M, Ottova V, Gaspar T, *et al.* Measuring mental health and well-being of school-  
42 children in 15 European countries using the KIDSCREEN-10 Index. *Int J Public Health*  
43 2009, 54 Suppl 2:160-6.  
44  
45  
46  
47  
48 25. Martinez-Gomez D, Martinez-De-Haro V, Del-Campo J, *et al.* [Validity of four  
49 questionnaires to assess physical activity in Spanish adolescents]. *Gac Sanit* 2009,  
50 23:512-7.  
51  
52  
53  
54  
55 26. Cole TJ, Bellizzi MC, Flegal KM, *et al.* Establishing a standard definition for child  
56 overweight and obesity worldwide: international survey. *BMJ* 2000, 320:1240-3.  
57  
58  
59  
60

- 1  
2  
3 27. Currie C, Molcho M, Boyce W, *et al.* Researching health inequalities in adolescents: the  
4 development of the Health Behaviour in School-Aged Children (HBSC) family affluence  
5 scale. *Soc Sci Med* 2008, 66:1429-36.  
6  
7  
8  
9  
10 28. Greenland S. Dose-response and trend analysis in epidemiology: alternatives to  
11 categorical analysis. *Epidemiology* 1995, 6:356-65.  
12  
13  
14 29. Iannotti RJ, Janssen I, Haug E, *et al.* Interrelationships of adolescent physical activity,  
15 screen-based sedentary behaviour, and social and psychological health. *Int J Public*  
16 *Health* 2009, 54 Suppl 2:191-8.  
17  
18  
19  
20 30. Hamer M, Stamatakis E, Steptoe A. Dose-response relationship between physical activity  
21 and mental health: the Scottish Health Survey. *Br J Sports Med* 2009, 43:1111-4.  
22  
23  
24  
25 31. Leblanc AG, Janssen I. Dose-response relationship between physical activity and  
26 dyslipidemia in youth. *Can J Cardiol* 2010, 26:201-5.  
27  
28  
29  
30 32. Mark AE, Janssen I. Dose-response relation between physical activity and blood pressure  
31 in youth. *Med Sci Sports Exerc* 2008, 40:1007-12.  
32  
33  
34  
35 33. Mavaddat N, Kinmonth AL, Sanderson S, *et al.* What determines Self-Rated Health  
36 (SRH)? A cross-sectional study of SF-36 health domains in the EPIC-Norfolk cohort. *J*  
37 *Epidemiol Community Health* 2011, 65:800-6.  
38  
39  
40  
41 34. Ravens-Sieberer U, Erhart M, Torsheim T, *et al.* An international scoring system for self-  
42 reported health complaints in adolescents. *Eur J Public Health* 2008, 18:294-9.  
43  
44  
45  
46 35. Galan I, Meseguer CM, Herruzo R, *et al.* Self-rated health according to amount, intensity  
47 and duration of leisure time physical activity. *Prev Med* 2010, 51:378-83.  
48  
49  
50  
51 36. Lee IM. Dose-response relation between physical activity and fitness: even a little is  
52 good; more is better. *JAMA* 2007; 297, 2137-9.  
53  
54  
55  
56  
57  
58  
59  
60



- 1  
2  
3 37. Van Der HK, Paw MJ, Twisk JW, *et al.* A brief review on correlates of physical activity  
4 and sedentariness in youth. *Med Sci Sports Exerc* 2007, 39:1241-50.  
5  
6  
7  
8 38. Ministry of Health, Social Services and Equality, 2012. National Health Survey 2006.  
9  
10 <http://www.msps.es/estadEstudios/estadisticas/encuestaNacional/encuesta2006.htm>  
11  
12 (accessed Dec 2012).  
13  
14  
15 39. Boardman JD. Self-rated health among U.S. adolescents. *J Adolesc Health* 2006, 38:401-  
16  
17 8.  
18  
19  
20 40. Fosse NE, Haas SA. Validity and stability of self-reported health among adolescents in a  
21  
22 longitudinal, nationally representative survey. *Pediatrics* 2009, 123:e496-e501.  
23  
24  
25 41. Galán I, Gandarillas A, Febrel C, *et al.* [Validation of self-reported weight and height in  
26  
27 an adolescent population]. *Gac Sanit* 2001, 15:490-7.  
28  
29  
30 42. Galán I, Meseguer CM, León CM, *et al.* Validity of adolescent self-reported smoking  
31  
32 [Validez de la medición del consumo de tabaco autodeclarado en población juvenil]. *Gac*  
33  
34 *Sanit* 2000, 14 Suppl 2: 85.  
35  
36  
37  
38  
39  
40  
41  
42  
43  
44  
45  
46  
47  
48  
49  
50  
51  
52  
53  
54  
55  
56  
57  
58  
59  
60

Table 1. Description of the sample and distribution of optimal self-rated health, less health complaints, high satisfaction with life and health-related quality of life, according to individual variables. Spanish adolescents aged 11–18 years, 2006.

|                                     |                       | Optimal Self-reported health<br>N (17467) | Less health complaints<br>N (16803) | High satisfaction with life<br>N (17358) | Health-related quality of life<br>N (16560) |
|-------------------------------------|-----------------------|-------------------------------------------|-------------------------------------|------------------------------------------|---------------------------------------------|
|                                     |                       | %                                         | %                                   | %                                        | Mean                                        |
| MVPA                                | Global                | 91.1                                      | 67.4                                | 90.9                                     | 47.1                                        |
|                                     | Never                 | 80.1*                                     | 54.1*                               | 82.3*                                    | 42.6*                                       |
|                                     | 1-2 days              | 87.5                                      | 62.8                                | 87.4                                     | 44.3                                        |
|                                     | 3-4 days              | 90.8                                      | 66.3                                | 91.3                                     | 46.2                                        |
|                                     | 5-6 days              | 94.8                                      | 72.8                                | 93.1                                     | 48.2                                        |
| Sex                                 | 7 days                | 95.9                                      | 74.1                                | 95.2                                     | 52.5                                        |
|                                     | Men                   | 93.3*                                     | 76.7*                               | 91.9*                                    | 48.3*                                       |
| Age                                 | Women                 | 89.3                                      | 59.5                                | 90.0                                     | 46.1                                        |
|                                     | 10-12                 | 95.8*                                     | 68.6                                | 94.9*                                    | 52.5*                                       |
|                                     | 13-16                 | 90.1                                      | 67.6                                | 89.8                                     | 45.6                                        |
| Born in Spain                       | 17-18                 | 86.8                                      | 65.1                                | 87.7                                     | 43.2                                        |
|                                     | Yes                   | 91.1                                      | 67.7*                               | 91.2*                                    | 47.2                                        |
|                                     | No                    | 91.2                                      | 62.9                                | 85.3                                     | 45.7                                        |
| Smoking                             | Non-smoker            | 94.5*                                     | 70.6*                               | 94.0*                                    | 49.3*                                       |
|                                     | Smoker                | 80.9                                      | 56.6                                | 83.7                                     | 42.8                                        |
|                                     | Ex-smoker             | 89.2                                      | 66.6                                | 86.9                                     | 44.1                                        |
| Consumption of alcohol              | Never                 | 95.4*                                     | 70.4*                               | 94.3*                                    | 50.7*                                       |
|                                     | Rarely                | 89.9                                      | 65.2                                | 88.9                                     | 45.4                                        |
|                                     | Monthly               | 88.1                                      | 66.3                                | 87.2                                     | 43.5                                        |
|                                     | Weekly or daily       | 85.2                                      | 64.2                                | 87.9                                     | 43.9                                        |
| Body-mass index                     | Normal or underweight | 92.5*                                     | 68.2*                               | 91.5*                                    | 47.0                                        |
|                                     | Overweight            | 86.7                                      | 67.6                                | 90.3                                     | 47.1                                        |
|                                     | Obese                 | 77.4                                      | 58.0                                | 83.0                                     | 46.6                                        |
|                                     | NR                    | 90.4                                      | 64.6                                | 89.4                                     | 47.2                                        |
| Consumption of fruit and vegetables | Quartile 1            | 88.2*                                     | 64.1*                               | 88.8*                                    | 45.8*                                       |
|                                     | Quartile 2            | 91.5                                      | 67.5                                | 91.5                                     | 46.5                                        |
|                                     | Quartile 3            | 92.5                                      | 69.7                                | 92.2                                     | 47.2                                        |
|                                     | Quartile 4            | 92.6                                      | 68.5                                | 91.2                                     | 48.7                                        |
| Breakfast during the week           | Every day             | 93.2*                                     | 70.4*                               | 92.6*                                    | 48.1*                                       |
|                                     | Not every day         | 85.5                                      | 59.1                                | 86.1                                     | 44.3                                        |
| Time spent TV and computers         | Quartile 1            | 91.1                                      | 68.7*                               | 91.5*                                    | 48.0*                                       |
|                                     | Quartile 2            | 91.1                                      | 69.4                                | 91.8                                     | 47.0                                        |
|                                     | Quartile 3            | 91.7                                      | 68.8                                | 91.5                                     | 47.0                                        |
|                                     | Quartile 4            | 90.2                                      | 62.8                                | 88.7                                     | 46.2                                        |
|                                     | NR                    | 92.6                                      | 65.4                                | 89.3                                     | 48.6                                        |
| Time spent studying/ homework       | Quartile 1            | 89.3*                                     | 68.8*                               | 87.1*                                    | 46.3*                                       |
|                                     | Quartile 2            | 92.2                                      | 69.3                                | 91.9                                     | 47.9                                        |
|                                     | Quartile 3            | 92.4                                      | 68.8                                | 92.5                                     | 47.7                                        |
|                                     | Quartile 4            | 90.5                                      | 62.9                                | 91.5                                     | 46.3                                        |
|                                     | NR                    | 89.4                                      | 69.3                                | 88.6                                     | 48.4                                        |
| Academic achievement                | Very good             | 96.3*                                     | 71.8*                               | 96.4*                                    | 52.4*                                       |
|                                     | Good                  | 94.0                                      | 69.7                                | 94.2                                     | 48.2                                        |
|                                     | Average               | 87.4                                      | 65.3                                | 87.3                                     | 44.2                                        |
|                                     | Low                   | 79.7                                      | 54.0                                | 75.3                                     | 41.7                                        |

\* p<0.05

MVPA: Moderate-to-Vigorous Physical Activity

NR: Non-response

Table 2. Description of the sample and distribution of optimal self-rated health, less health complaints, high satisfaction with life and health-related quality of life, according to family variables. Spanish adolescents aged 11–18 years, 2006.

|                                                       | Optimal Self-reported health<br>N (17467) | Less health complaints<br>N (16803) | High satisfaction with life<br>N (17358) | Health-related quality of life<br>N (16560) |
|-------------------------------------------------------|-------------------------------------------|-------------------------------------|------------------------------------------|---------------------------------------------|
|                                                       | %                                         | %                                   | %                                        | Mean                                        |
| Employment situation of father                        |                                           |                                     |                                          |                                             |
| Paid employment                                       | 91.5*                                     | 67.8*                               | 91.3*                                    | 47.2*                                       |
| No paid employment                                    | 86.9                                      | 63.0                                | 85.4                                     | 45.4                                        |
| Don't know                                            | 90.3                                      | 52.9                                | 91.5                                     | 43.3                                        |
| No father                                             | 85.4                                      | 59.8                                | 82.0                                     | 44.3                                        |
| Employment situation of mother                        |                                           |                                     |                                          |                                             |
| Paid employment                                       | 91.0                                      | 67.1                                | 90.8*                                    | 47.1*                                       |
| No paid employment                                    | 91.5                                      | 68.3                                | 91.4                                     | 47.0                                        |
| Don't know                                            | 90.9                                      | 59.1                                | 91.4                                     | 47.5                                        |
| No mother                                             | 83.7                                      | 58.7                                | 78.0                                     | 45.2                                        |
| Socioeconomic status                                  |                                           |                                     |                                          |                                             |
| Low                                                   | 86.2*                                     | 62.6*                               | 84.5*                                    | 45.2*                                       |
| Average                                               | 91.2                                      | 66.7                                | 90.9                                     | 46.9                                        |
| High                                                  | 92.9                                      | 69.9                                | 93.2                                     | 48.0                                        |
| Country of birth of father                            |                                           |                                     |                                          |                                             |
| Spain                                                 | 91.1                                      | 67.6                                | 91.2*                                    | 47.1                                        |
| Other countries                                       | 91.1                                      | 64.7                                | 86.2                                     | 46.4                                        |
| Country of birth of mother                            |                                           |                                     |                                          |                                             |
| Spain                                                 | 91.1                                      | 67.7*                               | 91.1*                                    | 47.1                                        |
| Other countries                                       | 91.9                                      | 62.4                                | 87.3                                     | 46.1                                        |
| Type of household                                     |                                           |                                     |                                          |                                             |
| Both parents                                          | 92.0*                                     | 68.4*                               | 91.9*                                    | 47.3*                                       |
| Single parent                                         | 86.9                                      | 62.2                                | 85.0                                     | 45.7                                        |
| Blended                                               | 83.0                                      | 59.3                                | 82.6                                     | 44.2                                        |
| Others                                                | 85.3                                      | 61.3                                | 86.8                                     | 46.8                                        |
| Number of adults in the household                     |                                           |                                     |                                          |                                             |
| 2                                                     | 91.7*                                     | 64.1*                               | 91.2*                                    | 47.3                                        |
| 0,1,3,4,5                                             | 88.8                                      | 68.3                                | 89.3                                     | 46.4                                        |
| Number of minors in the household                     |                                           |                                     |                                          |                                             |
| 1,2,3                                                 | 91.1                                      | 60.3*                               | 91.0                                     | 47.1                                        |
| >3                                                    | 90.6                                      | 68.0                                | 88.8                                     | 46.8                                        |
| Satisfaction: family relationships <sup>a</sup>       |                                           |                                     |                                          |                                             |
| Good                                                  | 93.0*                                     | 45.2*                               | 94.2*                                    | 48.0*                                       |
| Fair-bad                                              | 75.9                                      | 70.1                                | 64.2                                     | 39.4                                        |
| Satisfaction: relationships with friends <sup>a</sup> |                                           |                                     |                                          |                                             |
| Good                                                  | 92.0*                                     | 48.5*                               | 92.3*                                    | 47.5*                                       |
| Fair-bad                                              | 77.1                                      | 68.6                                | 68.5                                     | 40.0                                        |

\*  $p < 0.05$

<sup>a</sup> Good: score 7-10; Fair-bad: score 0-6

Table 3. Logistic models. Association between the amount of moderate-to-vigorous physical activity and optimal self-rated health, less health complaints and high satisfaction with life. Spanish adolescents aged 11–18 years, 2006.

|                                    | Men                 |        | Women               |   |        |
|------------------------------------|---------------------|--------|---------------------|---|--------|
|                                    | OR* (95% CI)        | P      | OR* (95% CI)        | P |        |
| <b>Optimal self-rated health</b>   |                     |        |                     |   |        |
| Frequency of undertaking MVPA      |                     |        |                     |   |        |
| Never                              | 1 (ref)             |        | 1 (ref)             |   |        |
| 1-2 days                           | 2.37 (1.56 to 3.58) | <0.001 | 1.20 (0.85 to 1.69) |   | 0.282  |
| 3-4 days                           | 2.34 (1.44 to 3.81) | 0.001  | 1.51 (1.06 to 2.14) |   | 0.020  |
| 5-6 days                           | 4.60 (2.60 to 8.13) | <0.001 | 2.28 (1.47 to 3.52) |   | <0.001 |
| 7 days                             | 4.05 (2.38 to 6.89) | <0.001 | 2.14 (1.37 to 3.34) |   | 0.001  |
| Linear trend P-value               | <0.001              |        | <0.001              |   |        |
| Quadratic trend P-value            | 0.325               |        | 0.850               |   |        |
| <b>Less health complaints</b>      |                     |        |                     |   |        |
| Frequency of undertaking MVPA      |                     |        |                     |   |        |
| Never                              | 1 (ref)             |        | 1 (ref)             |   |        |
| 1-2 days                           | 1.66 (1.14 to 2.42) | 0.008  | 1.16 (0.90 to 1.49) |   | 0.226  |
| 3-4 days                           | 1.65 (1.14 to 2.39) | 0.007  | 1.21 (0.93 to 1.58) |   | 0.143  |
| 5-6 days                           | 2.09 (1.47 to 2.96) | <0.001 | 1.46 (1.10 to 1.93) |   | 0.009  |
| 7 days                             | 1.94 (1.38 to 2.73) | <0.001 | 1.32 (0.97 to 1.80) |   | 0.076  |
| Linear trend P-value               | 0.001               |        | 0.021               |   |        |
| Quadratic trend P-value            | 0.216               |        | 0.463               |   |        |
| <b>High satisfaction with life</b> |                     |        |                     |   |        |
| Frequency of undertaking MVPA      |                     |        |                     |   |        |
| Never                              | 1 (ref)             |        | 1 (ref)             |   |        |
| 1-2 days                           | 1.99 (1.20 to 3.31) | 0.007  | 0.93 (0.63 to 1.36) |   | 0.722  |
| 3-4 days                           | 1.52 (0.90 to 2.55) | 0.111  | 1.44 (0.99 to 2.10) |   | 0.056  |
| 5-6 days                           | 2.02 (1.17 to 3.49) | 0.011  | 1.56 (0.98 to 2.49) |   | 0.059  |
| 7 days                             | 1.94 (1.09 to 3.44) | 0.023  | 2.00 (1.19 to 3.35) |   | 0.008  |
| Linear trend P-value               | 0.128               |        | <0.001              |   |        |
| Quadratic trend P-value            | 0.661               |        | 0.975               |   |        |

\* Adjusted for age, country of birth, smoking, alcohol consumption, BMI, consumption of fruit and vegetables, daily breakfast, time spent watching TV using computers, time spent studying, academic achievement, employment situation of the father and mother, socioeconomic status, country of birth of the father and mother, type of household, number of adults and number of minors in the household, satisfaction with family relationships and with friends.

Table 4. Linear models. Association between the amount of moderate-to-vigorous physical activity and health-related quality of life. Spanish adolescents aged 11–18 years, 2006.

|                               | Men                 |        | Women                 |        |
|-------------------------------|---------------------|--------|-----------------------|--------|
|                               | $\beta$ * (95% CI)  | P      | $\beta$ * (95% CI)    | P      |
| Frequency of undertaking MVPA |                     |        |                       |        |
| Never                         | 0 (ref)             |        | 0 (ref)               |        |
| 1-2 days                      | 1.61 (0.29 to 2.93) | 0.017  | 0.19 (- 0.71 to 1.10) | 0.676  |
| 3-4 days                      | 1.87 (0.50 to 3.24) | 0.007  | 1.19 (0.37 to 2.02)   | 0.005  |
| 5-6 days                      | 3.03 (1.74 to 4.31) | <0.001 | 2.79 (1.76 to 3.82)   | <0.001 |
| 7 days                        | 5.08 (3.73 to 6.43) | <0.001 | 5.09 (3.86 to 6.32)   | <0.001 |
| Linear trend P-value          | <0.001              |        | <0.001                |        |
| Quadratic trend P-value       | 0.006               |        | <0.001                |        |

\* Adjusted for age, country of birth, smoking, alcohol consumption, BMI, consumption of fruit and vegetables, daily breakfast, time spent watching TV and using computers, time spent studying, academic achievement, employment situation of the father and mother, socioeconomic status, country of birth of the father and mother, type of household, number of adults and number of minors in the household, satisfaction with family relationships and with friends.

1  
2  
3 Figure 1. Dose-response relationship of the amount of self-reported Moderate-to-  
4 Vigorous Physical Activity (MVPA) with optimal self-rated health, less health  
5 complaints, high satisfaction with life, and health-related quality of life among Spanish  
6 adolescents aged 11–18 years.  
7  
8  
9

10  
11 *Footnote:*

12 Curves represent adjusted odds ratios or mean differences (solid lines) and their 95%  
13 confidence intervals (dashed lines) based on restricted quadratic splines for the amount  
14 of MVPA with knots at 1, 3.5, and 6 days/week. The reference value (odds ratio = 1 and  
15 mean difference = 0) was set at 0 days/week of moderate-vigorous physical activity.  
16 Odds ratios and mean differences were obtained from logistic and linear regression  
17 models accounting for the complex survey and adjusted for personal and familial risk  
18 factors (see Methods). Bars represent the weighted bar charts of the amount of MVPA  
19 among men and women.  
20  
21  
22  
23  
24  
25  
26  
27  
28  
29  
30  
31  
32  
33  
34  
35  
36  
37  
38  
39  
40  
41  
42  
43  
44  
45  
46  
47  
48  
49  
50  
51  
52  
53  
54  
55  
56  
57  
58  
59  
60

1  
2  
3  
4  
5  
6  
7  
8  
9  
10  
11  
12  
13  
14  
15  
16  
17  
18  
19  
20  
21  
22  
23  
24  
25  
26  
27  
28  
29  
30  
31  
32  
33  
34  
35  
36  
37  
38  
39  
40  
41  
42  
43  
44  
45  
46  
47  
48  
49  
50  
51  
52  
53  
54  
55  
56  
57  
58  
59  
60



142x203mm (300 x 300 DPI)
